# Supplementary material for: PPM1H phosphatase counteracts LRRK2 signaling by selectively dephosphorylating Rab proteins
Source: eLife. 2019 Oct 30;8:e50416. doi: 10.7554/eLife.50416 (PMC6850886; doi:10.7554/eLife.50416)
Supplement: Supplementary file 2. [file elife-50416-supp2.xlsx]

## Sheet: pRab10_Stoichiometry
PPM1H-KO(-+ MLi2) and Wt-PPM1H (-+MLi2) pRab10 stoichiometry PRM experiment
Phosphopeptide
Sample	Replicate	Peptide sequence	m/z: Heavy charge state (z=2)	m/z: Heavy charge state (z=3)	m/z: Light charge state (z=2)	m/z: Light charge state (z=3)	Peptide Peak Found Ratio	Peptide Retention Time	Ratio To Standard	Ratio to standard*SpikeIn amount		pRab10 Stoichiometry: (pL/H)/((pL/H)+(non-phoL/H))*100
PPM1H-KO_-MLi2_01	RN_191005_RAB10_PRM_01	FHTITTSYYR	689.807	460.207	684.803	456.871	1	6.56	0.4388	4.388		2.60685
PPM1H-KO_-MLi2_02	RN_191005_RAB10_PRM_02	FHTITTSYYR	689.807	460.207	684.803	456.871	1	6.59	0.5115	5.115		2.89912
PPM1H-KO_-MLi2_03	RN_191005_RAB10_PRM_03	FHTITTSYYR	689.807	460.207	684.803	456.871	1	6.29	0.4019	4.019		2.13715
PPM1H-KO_+MLi2_01	RN_191005_RAB10_PRM_04	FHTITTSYYR	689.807	460.207	684.803	456.871	0.9	6.65	0.0813	0.813		0.388458
PPM1H-KO_+MLi2_02	RN_191005_RAB10_PRM_05	FHTITTSYYR	689.807	460.207	684.803	456.871	0.88	6.58	0.0439	0.439		0.217868
PPM1H-KO_+MLi2_03	RN_191005_RAB10_PRM_06	FHTITTSYYR	689.807	460.207	684.803	456.871	1	6.41	0.1014	1.014		0.30572
PPM1H-Wt_-MLi2_01	RN_191005_RAB10_PRM_07	FHTITTSYYR	689.807	460.207	684.803	456.871	1	6.55	0.1412	1.412		0.721642
PPM1H-Wt_-MLi2_02	RN_191005_RAB10_PRM_08	FHTITTSYYR	689.807	460.207	684.803	456.871	0.9	6.67	0.1247	1.247		0.716103
PPM1H-Wt_-MLi2_03	RN_191005_RAB10_PRM_09	FHTITTSYYR	689.807	460.207	684.803	456.871	0.98	6.59	0.2009	2.009		0.950898
PPM1H-Wt_+MLi2_01	RN_191005_RAB10_PRM_10	FHTITTSYYR	689.807	460.207	684.803	456.871	0.96	6.77	0.0424	0.424		0.294107
PPM1H-Wt_+MLi2_02	RN_191005_RAB10_PRM_11	FHTITTSYYR	689.807	460.207	684.803	456.871	0.88	6.71	0.0469	0.469		0.25356
PPM1H-Wt_+MLi2_03	RN_191005_RAB10_PRM_12	FHTITTSYYR	689.807	460.207	684.803	456.871	0.96	6.65	0.0828	0.828		0.399005
Non-Phosphopeptide
Sample	Replicate	Peptide sequence	m/z: Heavy charge state (z=2)	m/z: Heavy charge state (z=3)	m/z: Light charge state (z=2)	m/z: Light charge state (z=3)	Peptide Peak Found Ratio	Peptide Retention Time	Ratio To Standard	Ratio to standard*SpikeIn amount	Sum: L/H(Phospho)+L/H (Non-Phospho)
PPM1H-KO_-MLi2_01	RN_191005_RAB10_PRM_01	FHTITTSYYR	649.824	433.552	644.82	430.216	1	5.87	16.3938	163.938	168.326
PPM1H-KO_-MLi2_02	RN_191005_RAB10_PRM_02	FHTITTSYYR	649.824	433.552	644.82	430.216	0.94	5.96	17.1318	171.318	176.433
PPM1H-KO_-MLi2_03	RN_191005_RAB10_PRM_03	FHTITTSYYR	649.824	433.552	644.82	430.216	0.92	5.75	18.4035	184.035	188.054
PPM1H-KO_+MLi2_01	RN_191005_RAB10_PRM_04	FHTITTSYYR	649.824	433.552	644.82	430.216	1	5.99	20.8476	208.476	209.289
PPM1H-KO_+MLi2_02	RN_191005_RAB10_PRM_05	FHTITTSYYR	649.824	433.552	644.82	430.216	1	6.03	20.1059	201.059	201.498
PPM1H-KO_+MLi2_03	RN_191005_RAB10_PRM_06	FHTITTSYYR	649.824	433.552	644.82	430.216	1	5.73	33.0662	330.662	331.676
PPM1H-Wt_-MLi2_01	RN_191005_RAB10_PRM_07	FHTITTSYYR	649.824	433.552	644.82	430.216	1	5.96	19.4253	194.253	195.665
PPM1H-Wt_-MLi2_02	RN_191005_RAB10_PRM_08	FHTITTSYYR	649.824	433.552	644.82	430.216	1	6.07	17.289	172.89	174.137
PPM1H-Wt_-MLi2_03	RN_191005_RAB10_PRM_09	FHTITTSYYR	649.824	433.552	644.82	430.216	1	5.93	20.9265	209.265	211.274
PPM1H-Wt_+MLi2_01	RN_191005_RAB10_PRM_10	FHTITTSYYR	649.824	433.552	644.82	430.216	1	6.19	14.3741	143.741	144.165
PPM1H-Wt_+MLi2_02	RN_191005_RAB10_PRM_11	FHTITTSYYR	649.824	433.552	644.82	430.216	1	6.16	18.4497	184.497	184.966
PPM1H-Wt_+MLi2_03	RN_191005_RAB10_PRM_12	FHTITTSYYR	649.824	433.552	644.82	430.216	1	6.07	20.6688	206.688	207.516

## Sheet: pRabs_PRM
PPM1H-KO(-+ MLi2) and Wt-PPM1H (-+MLi2) pRabs PRM experiment
pRAB10									pRab8									pRab35							pRab3
Sample	Replicate	Phosphopeptide sequence	m/z: Heavy charge state (z=2)	m/z: Light charge state (z=2)	Peptide Peak Found Ratio	Peptide Retention Time	Ratio To Standard	pRab10 Difference: PPM1H-KO(-MLi2)/PPM1H-Wt (-MLi2)	Phosphopeptide sequence	m/z: Heavy charge state (z=2)	m/z: Heavy charge state (z=3)	m/z: Light charge state (z=2)	m/z: Light charge state (z=3)	Peptide Peak Found Ratio	Peptide Retention Time	Ratio To Standard	pRab8 Difference: PPM1H-KO(-MLi2)/PPM1H-Wt (-MLi2)	Phosphopeptide sequence	m/z: Heavy charge state (z=2)	m/z: Light charge state (z=2)	Peptide Peak Found Ratio	Peptide Retention Time	Ratio To Standard	pRab35 Difference: PPM1H-KO(-MLi2)/PPM1H-Wt (-MLi2)	Phosphopeptide sequence	m/z: Heavy charge state (z=2)	m/z: Light charge state (z=2)	Peptide Peak Found Ratio	Peptide Retention Time	Ratio To Standard	pRab3 Difference: PPM1H-KO(-MLi2)/PPM1H-Wt (-MLi2)
PPM1H-KO_-MLi2_01	RN_191006_pRab8-IP_PRM_01	FHTITTSYYR	689.807	684.803	1	7.76	0.0382	1.81905	FRTITTAYYR (missed 1)	691.331	461.223	686.327	457.887	0.65	8.09	0.014	ND	FRTITSTYYR (missed 1)	699.328	694.324	0.41	7.34	0.0082	1.46429	YRTITTAYYR (missed 1)	699.328	694.324	0.77	7.34	0.008	1
PPM1H-KO_-MLi2_02	RN_191006_pRab8-IP_PRM_02	FHTITTSYYR	689.807	684.803	1	7.71	0.0567	4.2	FRTITTAYYR (missed 1)	691.331	461.223	686.327	457.887	1	8.67	0.007	1.62791	FRTITSTYYR (missed 1)	699.328	694.324	1	8.11	0.0085	1.41667	YRTITTAYYR (missed 1)	699.328	694.324	1	7.29	0.0096	1.24675
PPM1H-KO_-MLi2_03	RN_191006_pRab8-IP_PRM_03	FHTITTSYYR	689.807	684.803	1	7.89	0.0366	1.31183	FRTITTAYYR (missed 1)	691.331	461.223	686.327	457.887	0.98	8.85	0.0046	2.55556	FRTITSTYYR (missed 1)	699.328	694.324	1	8.27	0.0088	1.12821	YRTITTAYYR (missed 1)	699.328	694.324	0.96	7.47	0.0105	1.28049
PPM1H-KO_+MLi2_01	RN_191006_pRab8-IP_PRM_04	FHTITTSYYR	689.807	684.803	1	7.68	0.0063		FRTITTAYYR (missed 1)	691.331	461.223	686.327	457.887	1	8.71	0.0037		FRTITSTYYR (missed 1)	699.328	694.324	0.95	8.09	0.0077		YRTITTAYYR (missed 1)	699.328	694.324	1	7.3	0.0098
PPM1H-KO_+MLi2_02	RN_191006_pRab8-IP_PRM_05	FHTITTSYYR	689.807	684.803	1	7.64	0.0048		FRTITTAYYR (missed 1)	691.331	461.223	686.327	457.887	0.92	8.64	0.0018		FRTITSTYYR (missed 1)	699.328	694.324	0.95	8.05	0.0051		YRTITTAYYR (missed 1)	699.328	694.324	1	7.28	0.0105
PPM1H-KO_+MLi2_03	RN_191006_pRab8-IP_PRM_06	FHTITTSYYR	689.807	684.803	1	7.57	0.0055		FRTITTAYYR (missed 1)	691.331	461.223	686.327	457.887	1	8.55	0.0045		FRTITSTYYR (missed 1)	699.328	694.324	1	8	0.0064		YRTITTAYYR (missed 1)	699.328	694.324	1	7.17	0.0078
PPM1H-Wt_-MLi2_01	RN_191006_pRab8-IP_PRM_07	FHTITTSYYR	689.807	684.803	1	7.69	0.021		FRTITTAYYR (missed 1)	691.331	461.223	686.327	457.887	1	8.69	0.0043		FRTITSTYYR (missed 1)	699.328	694.324	1	8.09	0.0056		YRTITTAYYR (missed 1)	699.328	694.324	1	7.31	0.008
PPM1H-Wt_-MLi2_02	RN_191006_pRab8-IP_PRM_08	FHTITTSYYR	689.807	684.803	1	7.72	0.0135		FRTITTAYYR (missed 1)	691.331	461.223	686.327	457.887	1	8.69	0.0018		FRTITSTYYR (missed 1)	699.328	694.324	0.95	8.1	0.006		YRTITTAYYR (missed 1)	699.328	694.324	0.96	7.31	0.0077
PPM1H-Wt_-MLi2_03	RN_191006_pRab8-IP_PRM_09	FHTITTSYYR	689.807	684.803	1	7.66	0.0279		FRTITTAYYR (missed 1)	691.331	461.223	686.327	457.887	1	8.66	0.0042		FRTITSTYYR (missed 1)	699.328	694.324	1	8.06	0.0078		YRTITTAYYR (missed 1)	699.328	694.324	1	7.27	0.0082
PPM1H-Wt_+MLi2_01	RN_191006_pRab8-IP_PRM_10	FHTITTSYYR	689.807	684.803	0.96	7.62	0.0034		FRTITTAYYR (missed 1)	691.331	461.223	686.327	457.887	0.94	8.56	0.0021		FRTITSTYYR (missed 1)	699.328	694.324	0.95	8	0.0043		YRTITTAYYR (missed 1)	699.328	694.324	1	7.19	0.0097
PPM1H-Wt_+MLi2_02	RN_191006_pRab8-IP_PRM_11	FHTITTSYYR	689.807	684.803	1	7.75	0.0047		FRTITTAYYR (missed 1)	691.331	461.223	686.327	457.887	0.98	8.69	0.0027		FRTITSTYYR (missed 1)	699.328	694.324	0.95	8.11	0.0036		YRTITTAYYR (missed 1)	699.328	694.324	0.85	7.31	0.0085
PPM1H-Wt_+MLi2_03	RN_191006_pRab8-IP_PRM_12	FHTITTSYYR	689.807	684.803	1	7.61	0.0043		FRTITTAYYR (missed 1)	691.331	461.223	686.327	457.887	0.96	8.63	0.0032		FRTITSTYYR (missed 1)	699.328	694.324	0.91	8.03	0.005		YRTITTAYYR (missed 1)	699.328	694.324	0.96	7.23	0.0097
