# Supplementary material for: PPM1H phosphatase counteracts LRRK2 signaling by selectively dephosphorylating Rab proteins
Source: eLife. 2019 Oct 30;8:e50416. doi: 10.7554/eLife.50416 (PMC6850886; doi:10.7554/eLife.50416)
Supplement: Supplementary file 3. [file elife-50416-supp3.xlsx]

## Sheet: HA_PPM1H_11TMT_IP
List of proteins identified from 11plex TMT HA-PPM1H-D288A+LRRK2-R1441G + Wt-PPM1H+LRRK2 R1441G+HA Empty																					Normalized TMT Reporter ion intensities
Gene names	Protein names	P-value (-Log10)	Difference: HA-PPM1H D288A+LRRK2(R1441G)/Wt+LRRK2(R1441G) (Log2)	Difference: HA-PPM1H D288A+LRRK2(R1441G)/Wt+LRRK2(R1441G)	Protein IDs	Majority protein IDs	Unique peptides	MS/MS count	Sequence coverage [%]	Only identified by site	Reverse	Potential contaminant	Peptides	Razor + unique peptides	Unique + razor sequence coverage [%]	Unique sequence coverage [%]	Mol. weight [kDa]	Q-value	Score	Intensity	HA-W8PPM1H-D288A_LRRK2-R1441G_01	HA-W8PPM1H-D288A_LRRK2-R1441G_02	HA-W8PPM1H-D288A_LRRK2-R1441G_03	HA-W8PPM1H-D288A_LRRK2-R1441G_04	HA-PPM1H_LRRK2-R1441G_01	HA-PPM1H_LRRK2-R1441G_02	HA-PPM1H_LRRK2-R1441G_03	HA-PPM1H_LRRK2-R1441G_04	HA-Empty_01	HA-Empty_02	HA-Empty_03
ACACB	Acetyl-CoA carboxylase 2;Biotin carboxylase	8.71338	5.75607	54.0443	O00763-3;O00763-2;O00763	O00763-3;O00763-2;O00763	2	20	1.8				3	2	1.5	1.5	255.09	0	1.8861	160090000000	8.63619	8.71953	8.40648	8.43526	2.98284	2.68392	2.77365	2.73276	-1.17977	0.878204	-2.38131
HIST1H2BM;HIST1H2BN;HIST1H2BH;HIST2H2BF;HIST1H2BC;HIST1H2BD;H2BFS;HIST1H2BK;HIST1H2BL;HIST1H2BA	Histone H2B type 1-M;Histone H2B type 1-N;Histone H2B type 1-H;Histone H2B type 2-F;Histone H2B type 1-C/E/F/G/I;Histone H2B type 1-D;Histone H2B type F-S;Histone H2B type 1-K;Histone H2B type 1-L;Histone H2B type 1-A	1.81616	1.77556	3.4237	Q99879;Q99877;Q93079;Q5QNW6;P62807;P58876;P57053;O60814;Q5QNW6-2;Q99880;Q96A08	Q99879;Q99877;Q93079;Q5QNW6;P62807;P58876;P57053;O60814;Q5QNW6-2;Q99880;Q96A08	2	22	55.6				9	9	55.6	7.9	13.989	0	68.345	16358000000	6.1885	4.44968	5.11585	4.1605	3.09003	2.90559	2.80089	4.01578	4.28616	0.156575	6.28221
RAB10	Ras-related protein Rab-10	5.76945	1.75939	3.38555	P61026	P61026	4	10	24				5	4	18.5	18.5	22.541	0	19.238	3343200000	3.40236	3.33458	3.14108	3.31682	1.73495	1.59056	1.38416	1.4476	-0.976152	-0.0303879	0.850055
HIST1H4A	Histone H4	2.1699	1.72646	3.30914	P62805	P62805	11	18	63.1				11	11	63.1	63.1	11.367	0	31.137	8248300000	4.87125	4.13437	3.96584	3.05032	2.23625	2.02688	1.98097	2.87185	4.3039	5.19099	4.58904
RAB8B	Ras-related protein Rab-8B	4.62102	1.33842	2.52875	Q92930	Q92930	3	7	31.9				6	3	15.9	15.9	23.584	0	8.025	231680000	0.347809	0.635344	0.194817	0.285583	-0.847813	-0.896343	-1.01049	-1.13549	1.88707	3.37678	-1.59309
RAB8A	Ras-related protein Rab-8A	4.71814	1.29278	2.45	P61006;DU68111;P61006-2;P59190-2;P59190	P61006;DU68111;P61006-2	11	27	61.4				14	14	61.4	48.8	23.668	0	44.73	7148500000	4.77245	5.06193	4.61797	4.74073	3.63636	3.52076	3.39776	3.46705	2.59038	3.16733	3.20504
HIST2H3A;HIST3H3;H3F3A;HIST1H3A	Histone H3.2;Histone H3.1t;Histone H3.3;Histone H3.1	1.08505	1.0009	2.00125	Q71DI3;Q16695;P84243;P68431;Q6NXT2	Q71DI3;Q16695;P84243;P68431	4	9	36.8				4	4	36.8	36.8	15.388	0	6.9387	9276300000	3.67546	1.56903	2.92726	2.20932	1.57943	1.44978	1.3181	2.03015	2.63736	-3.8631	3.83866
ACACA	Acetyl-CoA carboxylase 1;Biotin carboxylase	5.02072	0.855247	1.80907	Q13085-3;Q13085-2;Q13085;Q13085-4	Q13085-3;Q13085-2;Q13085;Q13085-4	2	5	1.5				3	3	1.5	1.2	257.24	0	5.86	203300000	-0.974684	-0.951645	-1.10706	-1.11739	-1.88854	-1.77969	-2.00019	-1.90334	-4.46586	-2.1261	-1.51562
RAB13	Ras-related protein Rab-13	2.8104	0.825025	1.77157	P51153	P51153	5	12	31				6	5	25.6	25.6	22.774	0	36.404	1103800000	1.88901	2.24259	1.8468	1.65927	0.840967	1.25287	1.07769	1.16604	1.19687	2.04047	0.0403814
NUMA1	Nuclear mitotic apparatus protein 1	0.564387	0.789492	1.72847	Q14980-4;Q14980-3;Q14980-2;Q14980	Q14980-4;Q14980-3;Q14980-2;Q14980	4	4	2.9				4	4	2.9	2.9	200.09	0	4.4967	123230000	-1.79299	-1.45237	-1.62927	0.946646	-1.89201	-1.87292	-1.83703	-1.48399	-2.27576	NaN	-1.53683
VIM	Vimentin	0.86707	0.71013	1.63595	P08670;P17661;P41219;P41219-2;CON__Q6ISB0;CON__Q9DCV7;CON__Q9NSB2;Q9NSB2;P05787-2;Q16352;CON__P05787;P05787;CON__O43790;CON__P78386;CON__Q6NT21;CON__Q61726;CON__Q9H552;CON__Q7RTT2;CON__P78385;CON__Q8N1N4-2;P78386;CON__H-INV:HIT000292931;Q8N1N4;CON__Q14533;Q14533;Q8N1N4-2;P14136-3;O43790;P14136-2;P14136;P78385	P08670	19	41	54.7				23	23	54.7	48.9	53.651	0	93.92	3824100000	4.61321	2.90237	3.8156	3.18225	3.32472	2.57482	2.77705	2.99631	3.33721	1.34371	4.61357
ZNF225	Zinc finger protein 225	0.369932	0.694854	1.61872	Q9UK10	Q9UK10	2	1	3.3				2	2	3.3	3.3	82.471	0.00075586	1.6895	39207000	-7.94137	-5.32953	-8.22152	-8.75285	-7.88557	-7.65341	-8.83442	-8.65129	-0.450394	0.74117	-6.78786
PTBP1	Polypyrimidine tract-binding protein 1	0.825814	0.655653	1.57533	P26599;P26599-2;P26599-3	P26599;P26599-2;P26599-3	7	14	15.8				7	7	15.8	15.8	57.221	0	13.763	668640000	1.77441	0.996986	2.16393	2.87067	1.36466	1.0942	1.34758	1.37694	0.845007	2.11918	1.80527
DNAH8	Dynein heavy chain 8, axonemal	0.607316	0.634441	1.55234	Q96JB1-2;Q96JB1	Q96JB1-2;Q96JB1	2	2	0.8				2	2	0.8	0.8	510.44	0	1.8936	1375100000	1.55327	3.06063	0.976675	1.70421	1.35771	1.73169	0.71851	0.949116	NaN	1.35022	-2.17195
EIF3D	Eukaryotic translation initiation factor 3 subunit D	3.16475	0.627137	1.5445	O15371-2;O15371-3;O15371	O15371-2;O15371-3;O15371	4	5	12.8				4	4	12.8	12.8	58.14	0	10.491	344180000	0.073885	0.0564384	-0.0584831	-0.131407	-0.827156	-0.714777	-0.429785	-0.596397	-0.0258465	-2.56814	0.596391
NID2	Nidogen-2	0.413269	0.605797	1.52182	Q14112-2;Q14112	Q14112-2;Q14112	2	2	3.1				2	2	3.1	3.1	140.86	0	2.7589	55020000	-2.02579	0.487988	-2.1688	-2.00378	-1.96865	-1.77198	-2.26295	-2.12998	NaN	NaN	-1.12813
NOP58	Nucleolar protein 58	0.449959	0.601095	1.51687	Q9Y2X3	Q9Y2X3	2	2	8.1				2	2	8.1	8.1	59.578	0	1.9924	393250000	-4.04034	-1.99197	-4.39031	-4.55876	-4.28294	-4.22012	-4.57926	-4.30344	-4.93647	-1.69711	-4.8887
PRC1	Protein regulator of cytokinesis 1	0.417356	0.590854	1.50614	O43663-3;O43663-4;O43663;O43663-2	O43663-3;O43663-4;O43663;O43663-2	2	2	3.2				2	2	3.2	3.2	61.388	0.0021676	1.4854	52591000	-3.30142	-0.916367	-3.3863	-3.53061	-3.55143	-3.29187	-3.35534	-3.29947	1.83934	3.50848	-3.06697
TMEM11	Transmembrane protein 11, mitochondrial	0.758971	0.58064	1.49551	P17152	P17152	2	2	12.5				2	2	12.5	12.5	21.541	0	3.1664	57909000	-1.87185	-2.03638	-1.87901	-0.514889	-2.12135	-1.83065	-2.41945	-2.25323	-0.662783	-1.82847	-3.29851
CHCHD3	MICOS complex subunit MIC19	0.587698	0.57689	1.49163	Q9NX63	Q9NX63	10	20	41.9				10	10	41.9	41.9	26.152	0	27.072	1737900000	2.33726	2.88386	2.27578	4.22569	2.36207	2.47443	2.08997	2.48857	1.14544	1.70704	1.56585
TAF15	TATA-binding protein-associated factor 2N	1.61224	0.572586	1.48719	Q92804-2;Q92804	Q92804-2;Q92804	2	5	11				3	2	8.7	8.7	61.557	0	17.592	527260000	1.24362	0.873367	1.45148	1.12402	0.366329	0.934278	0.332703	0.768827	1.21157	NaN	2.93405
PUF60	Poly(U)-binding-splicing factor PUF60	1.08174	0.569079	1.48358	Q9UHX1-4;Q9UHX1-6;Q9UHX1-3;Q9UHX1-5;Q9UHX1-2;Q9UHX1	Q9UHX1-4;Q9UHX1-6;Q9UHX1-3;Q9UHX1-5;Q9UHX1-2;Q9UHX1	3	5	7				3	3	7	7	54.024	0	5.4604	67909000	-1.83266	-1.53279	-1.96305	-0.753979	-2.14356	-1.99564	-2.05725	-2.16233	NaN	-0.423491	-1.1318
SH3GL1;SH3GL2	Endophilin-A2;Endophilin-A1	0.657538	0.516772	1.43075	Q99961-3;Q99961-2;Q99961;Q99962	Q99961-3;Q99961-2;Q99961;Q99962	2	2	4.9				2	2	4.9	4.9	34.519	0.0074488	1.0143	68306000	-2.55448	-1.17711	-2.73564	-2.66299	-2.80732	-2.89256	-2.59071	-2.90672	1.0092	2.46381	-2.197
RAB35	Ras-related protein Rab-35	3.58824	0.487022	1.40155	Q15286-2;Q15286	Q15286-2;Q15286	3	6	19.1				3	3	19.1	19.1	17.058	0	7.9632	455270000	0.840673	0.84248	0.733917	0.697611	0.418434	0.332838	0.200672	0.214647	-0.377718	-2.8633	0.0211611
TRIP11	Thyroid receptor-interacting protein 11	0.562232	0.460162	1.3757	Q15643	Q15643	2	2	1.1				2	2	1.1	1.1	227.58	0	1.953	670920000	0.414362	0.514175	-0.655516	-0.903151	-0.479866	-0.461166	-0.559284	-0.970459	-1.79531	-1.26573	-2.59534
ANAPC7	Anaphase-promoting complex subunit 7	0.968188	0.456384	1.3721	Q9UJX3-2;Q9UJX3	Q9UJX3-2;Q9UJX3	5	9	11				5	5	11	11	60.002	0	9.773	619070000	1.09924	1.08604	1.86601	0.770393	0.93199	0.736702	0.655916	0.671537	-0.198173	1.52306	0.0612783
RBM26	RNA-binding protein 26	0.493274	0.439408	1.35605	Q5T8P6-3;Q5T8P6-2;Q5T8P6;Q5T8P6-6;Q5T8P6-5;Q5T8P6-4	Q5T8P6-3;Q5T8P6-2;Q5T8P6;Q5T8P6-6;Q5T8P6-5;Q5T8P6-4	2	2	2.8				2	2	2.8	2.8	110.66	0	2.6028	62414000	-2.09719	-0.566582	-2.24405	-2.16777	-2.19665	-2.07389	-2.36841	-2.19427	5.00369	5.89516	-1.20709
HNRNPC	Heterogeneous nuclear ribonucleoproteins C1/C2	0.848384	0.434777	1.3517	P07910-2;P07910;P07910-4;P07910-3;P0DMR1;O60812;B7ZW38;B2RXH8	P07910-2;P07910;P07910-4	4	4	16.4				4	4	16.4	16.4	32.337	0	5.0207	1071900000	2.84599	1.80964	2.40541	1.98079	1.70548	1.59875	2.10346	1.89504	2.6876	0.688202	3.17414
DNM1L	Dynamin-1-like protein	0.789928	0.42427	1.34189	O00429-4;O00429-5;O00429-3;O00429-2;O00429;O00429-8;O00429-6;O00429-7	O00429-4;O00429-5;O00429-3;O00429-2;O00429;O00429-8;O00429-6;O00429-7	3	4	7				4	4	7	5.6	78.099	0	18.532	62030000	-3.09085	-1.92868	-2.78058	-2.36749	-2.75803	-3.1318	-2.90232	-3.07252	-1.08618	0.676961	-3.40232
EDC4	Enhancer of mRNA-decapping protein 4	0.828097	0.422812	1.34054	Q6P2E9-2;Q6P2E9	Q6P2E9-2;Q6P2E9	3	3	4.9				3	3	4.9	4.9	109.73	0	34.343	44904000	-2.08335	-1.09059	-2.20525	-1.68814	-2.12714	-2.09909	-2.23917	-2.29317	-0.55198	-0.37873	-2.41402
PRAF2	PRA1 family protein 2	0.38723	0.406178	1.32517	O60831	O60831	2	3	12.4				2	2	12.4	12.4	19.258	0	4.4283	398130000	-0.295046	1.42071	-0.521553	-0.329636	-0.327976	-0.214691	-0.533785	-0.273785	-2.43585	NaN	-2.93796
SRSF8;SRSF2	Serine/arginine-rich splicing factor 8;Serine/arginine-rich splicing factor 2	0.465375	0.398888	1.31849	Q9BRL6-2;Q9BRL6;Q01130-2;Q01130	Q9BRL6-2;Q9BRL6;Q01130-2;Q01130	2	1	10.2				2	2	10.2	10.2	31.424	0	2.0029	39103000	-2.61764	-0.983009	-1.29514	-2.05823	-2.38673	-2.08522	-1.85056	-2.22705	-3.51226	NaN	-1.13817
AP1M1;AP1M2	AP-1 complex subunit mu-1;AP-1 complex subunit mu-2	0.567147	0.397841	1.31754	Q9BXS5;Q9BXS5-2;Q9Y6Q5;Q9Y6Q5-2	Q9BXS5;Q9BXS5-2;Q9Y6Q5;Q9Y6Q5-2	2	2	5.9				2	2	5.9	5.9	48.586	0	2.1654	36709000	-2.85614	-2.79788	-2.92451	-1.59819	-2.78587	-2.79702	-3.08391	-3.1013	-2.25708	-1.13112	-2.37144
RPS7	40S ribosomal protein S7	0.787692	0.395056	1.31499	P62081	P62081	2	6	9.8				2	2	9.8	9.8	22.127	0	2.751	259110000	-0.214151	-0.367949	0.0167389	0.670969	-0.520245	-0.435413	-0.0847759	-0.434183	-0.914476	-0.754061	0.880393
NUP88	Nuclear pore complex protein Nup88	0.357695	0.388507	1.30904	Q99567	Q99567	2	2	3.9				2	2	3.9	3.9	83.541	0	3.1979	93170000	-3.29227	-1.37571	-3.21748	-3.22959	-3.22437	-3.12051	-3.19502	-3.12917	1.88542	3.4057	-2.34369
YWHAQ	14-3-3 protein theta	2.98974	0.384459	1.30537	P27348	P27348	7	25	47.8				11	8	43.3	39.6	27.764	0	228.7	2552100000	2.15426	2.34512	2.1082	2.22236	1.77871	1.88619	1.7348	1.8924	0.650803	0.679353	0.861169
VAMP3;VAMP2	Vesicle-associated membrane protein 3;Vesicle-associated membrane protein 2	0.341502	0.356853	1.28063	Q15836;P63027;P23763-2;P23763-3;P23763	Q15836;P63027	3	8	49				3	3	49	49	11.309	0	15.505	360260000	0.255518	1.98775	0.228035	0.197119	0.470278	0.421995	0.174221	0.174517	1.37815	1.30579	-0.0420752
VCL	Vinculin	0.893285	0.355432	1.27937	P18206-3;P18206-2;P18206	P18206-3;P18206-2;P18206	2	1	9.5				2	2	9.5	9.5	24.904	0	2.0639	7240700	-5.38211	-5.60201	-4.83598	-4.82042	-5.57531	-5.52677	-5.39365	-5.56651	-5.74829	-3.19246	-4.93532
XPO7	Exportin-7	0.604525	0.353266	1.27745	Q9UIA9	Q9UIA9	4	7	5.4				5	5	5.4	4	123.91	0	18.814	305300000	0.558336	1.4476	0.189037	0.670828	0.42157	0.514193	0.137108	0.379871	1.00194	1.16043	-0.929734
STMN1;STMN2	Stathmin;Stathmin-2	0.227254	0.35311	1.27731	P16949;P16949-2;Q93045;Q93045-2	P16949;P16949-2;Q93045;Q93045-2	2	3	12.1				2	2	12.1	12.1	17.302	0	3.9042	67890000	-2.08811	-1.15256	-0.00747871	-0.773689	-1.68062	-2.39855	-0.27047	-1.08465	-0.659264	NaN	0.561408
PPP2R5E	Serine/threonine-protein phosphatase 2A 56 kDa regulatory subunit epsilon isoform	0.612705	0.350211	1.27475	Q16537-3;Q16537-2;Q16537	Q16537-3;Q16537-2;Q16537	2	1	6.4				2	2	6.4	6.4	46.179	0	24.192	19159000	-5.59731	-5.29054	-5.64893	-4.48209	-5.66168	-5.6486	-5.53516	-5.57427	NaN	NaN	-6.41299
LDHB	L-lactate dehydrogenase B chain	0.328106	0.338324	1.26429	P07195	P07195	8	17	30.8				9	9	30.8	27.2	36.638	0	45.749	2468800000	3.11018	2.67437	3.54228	3.22684	2.48558	1.94749	3.83897	2.92833	3.44115	-1.81028	5.08513
FUBP3	Far upstream element-binding protein 3	1.25606	0.336581	1.26276	Q96I24;Q96I24-2	Q96I24;Q96I24-2	12	20	34.4				14	12	31.1	31.1	61.64	0	47.643	1883000000	2.10591	2.26701	1.94746	2.58655	1.84681	1.98704	1.81108	1.91568	1.50342	1.1484	1.6677
ATIC	Bifunctional purine biosynthesis protein PURH;Phosphoribosylaminoimidazolecarboxamide formyltransferase;IMP cyclohydrolase	1.93465	0.335727	1.26201	P31939-2;P31939	P31939-2;P31939	2	3	4.9				2	2	4.9	4.9	64.523	0	4.0154	11325000	-2.8369	-2.92698	-2.61694	-2.6081	-3.20654	-3.11659	-3.00584	-3.00286	-3.94532	-4.32297	-2.19012
EIF5A;EIF5AL1;EIF5A2	Eukaryotic translation initiation factor 5A-1;Eukaryotic translation initiation factor 5A-1-like;Eukaryotic translation initiation factor 5A-2	0.439636	0.334591	1.26102	P63241;Q6IS14;Q9GZV4;P63241-2	P63241;Q6IS14;Q9GZV4;P63241-2	3	4	29.9				4	4	29.9	29.9	16.832	0	35.81	90358000	-0.586113	-0.303659	0.280437	0.382771	-0.79126	-0.779898	0.246992	-0.240763	-1.60589	0.252518	1.05889
FARSA	Phenylalanine--tRNA ligase alpha subunit	0.96091	0.330416	1.25738	Q9Y285-2;Q9Y285	Q9Y285-2;Q9Y285	2	5	7.8				3	3	7.8	5.5	54.157	0	2.7244	102960000	-1.41682	-1.14575	-1.94062	-1.43101	-1.92188	-1.64989	-1.8199	-1.8642	-1.25849	NaN	-1.766
GOLGB1	Golgin subfamily B member 1	0.336508	0.329764	1.25681	Q14789-4;Q14789-3;Q14789;Q14789-2	Q14789-4;Q14789-3;Q14789;Q14789-2	3	3	1.5				3	3	1.5	1.5	367.42	0	4.1154	46219000	-0.823812	-1.81281	-1.40751	-0.108698	-0.99169	-1.22019	-1.90871	-1.3513	-3.8077	-4.93301	-1.74685
SLC25A24	Calcium-binding mitochondrial carrier protein SCaMC-1	0.292798	0.329561	1.25663	Q6NUK1-2;Q6NUK1	Q6NUK1-2;Q6NUK1	2	3	5.7				2	2	5.7	5.7	51.354	0	2.2386	84069000	-1.77426	-1.93828	-1.79872	0.0205231	-1.62868	-1.71333	-1.87695	-1.59002	-1.72693	-1.92275	-1.53683
RAB5B	Ras-related protein Rab-5B	0.131098	0.32243	1.25043	P61020-2;P61020	P61020-2;P61020	2	2	27.6				4	2	15.5	15.5	19.09	0	2.5505	93526000	-2.23927	1.35554	-2.24615	-2.24991	-1.19284	-2.16037	-1.8651	-1.45121	-3.23316	-0.286688	-2.17753
UBE2N;UBE2NL	Ubiquitin-conjugating enzyme E2 N;Putative ubiquitin-conjugating enzyme E2 N-like	0.801506	0.31307	1.24235	P61088;Q5JXB2	P61088;Q5JXB2	2	5	19.7				2	2	19.7	19.7	17.138	0	18.593	122380000	0.363853	-0.406744	0.154446	-0.223742	-0.423901	-0.535789	-0.188232	-0.216545	0.282296	NaN	1.28034
TUBB8	Tubulin beta-8 chain	0.174078	0.305714	1.23603	Q3ZCM7	Q3ZCM7	3	3	29.3				12	3	11.5	11.5	49.775	0	4.2192	320260000	-0.947586	1.46037	-1.42961	-1.18287	-0.783001	-0.478159	-1.08547	-0.975924	-1.15254	0.695057	-1.85904
SNRPN;SNRPB	Small nuclear ribonucleoprotein-associated protein N;Small nuclear ribonucleoprotein-associated proteins B and B	0.505867	0.305187	1.23558	P63162-2;P14678-2;P63162;P14678;P14678-3	P63162-2;P14678-2;P63162;P14678;P14678-3	2	1	7.4				2	2	7.4	7.4	25.075	0.0034459	1.3122	106050000	-1.65201	-2.33261	-1.51362	-0.998697	-2.01658	-1.9241	-1.87555	-1.90145	-3.53055	NaN	-0.802022
CS	Citrate synthase, mitochondrial	1.10382	0.300162	1.23128	O75390	O75390	2	2	3.9				2	2	3.9	3.9	51.712	0	2.6303	32503000	-4.65876	-4.16669	-4.51155	-4.48919	-4.84048	-4.97996	-4.5379	-4.6685	-4.99636	-2.12086	-3.25292
LDHA	L-lactate dehydrogenase A chain	0.309092	0.296105	1.22782	P00338;P00338-4;P00338-3;P00338-5;P00338-2;Q6ZMR3;P07864	P00338;P00338-4;P00338-3;P00338-5;P00338-2	5	7	22.9				6	5	19.3	19.3	36.688	0	23.989	1295900000	1.67243	1.32902	1.90098	1.5611	0.975681	0.562204	2.36339	1.37783	1.95371	1.88006	3.53173
CHTOP	Chromatin target of PRMT1 protein	1.14966	0.289183	1.22195	Q9Y3Y2-4;Q9Y3Y2;Q9Y3Y2-3	Q9Y3Y2-4;Q9Y3Y2;Q9Y3Y2-3	2	3	17.3				2	2	17.3	17.3	21.918	0	6.1296	25111000	-2.8003	-2.89278	-2.42019	-2.39785	-2.98727	-2.86099	-2.86149	-2.95811	NaN	NaN	-1.44865
FKBP4	Peptidyl-prolyl cis-trans isomerase FKBP4;Peptidyl-prolyl cis-trans isomerase FKBP4, N-terminally processed	0.318617	0.280118	1.21429	Q02790	Q02790	2	3	5.2				2	2	5.2	5.2	51.804	0	3.4485	143560000	-2.43175	-1.36319	-1.29192	-1.85197	-2.30103	-2.45238	-1.26996	-2.03594	-0.629794	0.969333	0.187867
LRBA	Lipopolysaccharide-responsive and beige-like anchor protein	0.242061	0.273582	1.20881	P50851-2;P50851	P50851-2;P50851	2	2	0.8				2	2	0.8	0.8	317.7	0	1.8072	40657000	-4.6318	-2.7592	-4.53519	-4.48171	-4.37879	-4.12651	-4.59167	-4.40527	0	-0.0248146	-5.45169
RPL12	60S ribosomal protein L12	0.523604	0.273163	1.20845	P30050;P30050-2	P30050;P30050-2	6	14	41.8				6	6	41.8	41.8	17.818	0	83.56	2507900000	3.04449	4.03058	3.00504	3.21091	3.06783	3.06985	3.0064	3.0543	2.01923	1.77794	3.99828
GAPDH	Glyceraldehyde-3-phosphate dehydrogenase	0.873384	0.272664	1.20804	P04406;P04406-2	P04406;P04406-2	14	27	56.4				14	14	56.4	56.4	36.053	0	46.236	4771500000	3.98852	4.13124	4.1746	3.91117	3.58154	3.56025	4.18528	3.7878	4.11002	4.76108	5.00923
CBX3	Chromobox protein homolog 3	1.13486	0.268317	1.2044	Q13185	Q13185	3	5	21.3				3	3	21.3	21.3	20.811	0	6.2757	143480000	0.375252	0.273062	0.150272	-0.137062	-0.258793	-0.0244179	-0.0249596	-0.103575	0.422036	-0.94987	0.708003
ARFIP1	Arfaptin-1	0.43761	0.268033	1.20416	P53367-3;P53367-2;P53367	P53367-3;P53367-2;P53367	2	3	14.5				2	2	14.5	14.5	22.054	0	2.6138	52229000	-2.58618	-2.43186	-1.47429	-2.48808	-2.26639	-2.50366	-2.64591	-2.63657	-5.41806	-2.24443	-3.91832
ABCC4	Multidrug resistance-associated protein 4	0.45962	0.266175	1.20261	O15439-4;O15439-3;O15439-2;O15439	O15439-4;O15439-3;O15439-2;O15439	2	2	5.1				2	2	5.1	5.1	88.137	0	6.869	5214500	-5.42348	-5.44054	-5.9437	-5.02027	-5.41619	-5.57976	-6.24144	-5.65529	NaN	NaN	NaN
LPHN2	Latrophilin-2	1.53181	0.258841	1.19652	O95490-3;O95490-4;O95490-2;O95490-5;O95490;O95490-7;O95490-6	O95490-3;O95490-4;O95490-2;O95490-5;O95490;O95490-7;O95490-6	3	6	4				3	3	4	4	126.16	0	90.755	55698000	-1.09669	-0.999411	-1.25669	-1.19954	-1.30674	-1.30073	-1.60373	-1.3765	-5.16235	-7.77611	-2.17688
YWHAE	14-3-3 protein epsilon	2.18703	0.255815	1.19401	P62258;P62258-2	P62258;P62258-2	11	20	50.2				12	11	47.1	47.1	29.174	0	46.404	2292100000	2.82764	2.98813	2.91234	2.90215	2.51542	2.62902	2.76655	2.696	2.91384	-0.569113	2.92457
YWHAZ	14-3-3 protein zeta/delta	1.82394	0.247323	1.187	P63104;P63104-2	P63104	10	27	56.3				13	13	56.3	51.8	27.745	0	180.32	4056300000	3.59916	3.35545	3.63442	3.56523	3.18969	3.28892	3.37259	3.31376	2.18876	1.83855	3.04816
TROVE2	60 kDa SS-A/Ro ribonucleoprotein	0.252936	0.246076	1.18598	P10155-3;P10155-5;P10155-4;P10155;P10155-2	P10155-3;P10155-5;P10155-4;P10155	5	9	12.7				5	5	12.7	12.7	58.482	0	14.059	394530000	0.469696	1.9037	0.467005	0.513634	0.98983	0.795586	0.26454	0.319773	-0.518337	-1.57769	0.689664
MARS	Methionine--tRNA ligase, cytoplasmic	0.565548	0.245534	1.18553	P56192;P56192-2	P56192;P56192-2	9	13	10.6				9	9	10.6	10.6	101.11	0	20.046	832650000	1.25687	1.30227	1.16192	2.02487	1.17394	1.19321	1.09298	1.30366	1.60322	-0.536174	1.14812
AFG3L2	AFG3-like protein 2	0.212136	0.239087	1.18025	Q9Y4W6	Q9Y4W6	7	6	8				7	7	8	8	88.583	0	9.1034	419510000	-0.016428	1.72102	-0.0246048	-0.145117	0.164904	0.209673	0.0105076	0.193438	2.83482	2.31469	-0.128131
TCEB1	Transcription elongation factor B polypeptide 1	0.276663	0.237168	1.17868	Q15369;Q15369-2	Q15369;Q15369-2	3	5	44.6				3	3	44.6	44.6	12.473	0	44.427	233230000	-0.952141	0.362104	-1.10662	-1.03583	-0.841923	-0.821692	-1.08488	-0.932678	-0.670472	0.364619	-0.696456
COPS4	COP9 signalosome complex subunit 4	0.812265	0.236445	1.17809	Q9BT78;Q9BT78-2	Q9BT78;Q9BT78-2	3	6	9.6				3	3	9.6	9.6	46.268	0	14.351	115620000	-1.10583	-1.08045	-1.11971	-0.536245	-1.19628	-1.176	-1.1345	-1.28122	-0.48174	-0.177174	-0.259467
C1QBP	Complement component 1 Q subcomponent-binding protein, mitochondrial	0.495214	0.234364	1.17639	Q07021	Q07021	2	10	14.9				2	2	14.9	14.9	31.362	0	37.56	117740000	-1.49643	-0.804411	-0.972589	-1.37019	-1.61955	-1.60509	-1.01575	-1.34068	-0.29342	-0.721219	-0.151122
PSMA4	Proteasome subunit alpha type-4	0.422943	0.233853	1.17597	P25789;P25789-2	P25789;P25789-2	2	2	11.9				2	2	11.9	11.9	29.483	0.0034083	1.2808	104460000	-1.77211	-0.852783	-1.77083	-1.26581	-1.66624	-1.35249	-1.83013	-1.74809	-1.56567	-0.0827532	-1.49218
GLO1	Lactoylglutathione lyase	0.214096	0.229455	1.17239	Q04760-2;Q04760	Q04760-2;Q04760	2	2	16.6				2	2	16.6	16.6	19.043	0	3.8844	88973000	-2.52481	-1.89627	-1.13812	-1.61104	-2.40219	-2.62609	-1.22031	-1.83947	-2.37856	NaN	-0.485841
ANXA2P2;ANXA2	Putative annexin A2-like protein;Annexin A2	0.43855	0.227902	1.17113	A6NMY6;P07355;P07355-2	A6NMY6;P07355;P07355-2	4	5	15.9				4	4	15.9	15.9	38.659	0	31.206	119040000	-1.3966	-0.560001	-1.22795	-1.4218	-1.619	-1.53172	-1.16143	-1.2058	-0.669153	1.45892	-0.360869
APRT	Adenine phosphoribosyltransferase	0.928278	0.22767	1.17094	P07741-2;P07741	P07741-2;P07741	2	3	26.9				3	3	26.9	18.7	14.557	0.005148	1.1064	43651000	-3.09876	-2.86413	-2.74575	-2.56931	-3.07571	-3.1155	-2.87881	-3.11861	-1.17848	-0.296206	-2.61878
ANKFY1	Rabankyrin-5	1.66606	0.226979	1.17038	Q9P2R3;Q9P2R3-2;Q9P2R3-4	Q9P2R3;Q9P2R3-2;Q9P2R3-4	2	2	2.8				2	2	2.8	2.8	128.4	0	10.463	33257000	-4.89185	-4.68226	-4.94	-4.78	-4.96146	-4.98487	-5.14721	-5.10848	-2.99849	-0.64377	-2.77606
VAC14	Protein VAC14 homolog	0.0793608	0.225361	1.16907	Q08AM6	Q08AM6	2	2	3.2				2	2	3.2	3.2	87.972	0.005632	1.042	27521000	-3.67332	-0.264278	-4.12065	-4.53192	-2.74655	-2.96367	-3.9795	-3.80189	2.09646	2.7609	-2.04211
HNRNPA2B1	Heterogeneous nuclear ribonucleoproteins A2/B1	0.758395	0.224979	1.16876	P22626;P22626-2	P22626;P22626-2	3	6	11.6				3	3	11.6	11.6	37.429	0	5.9983	1135800000	2.21375	2.42288	2.3902	2.06413	1.73863	1.97952	2.26153	2.21136	2.27433	0.406057	3.98223
GNB1	Guanine nucleotide-binding protein G(I)/G(S)/G(T) subunit beta-1	0.631046	0.222428	1.1667	P62873;P62873-2;P62879-2;P16520-2;P16520	P62873;P62873-2	4	11	33.8				8	8	33.8	15.9	37.377	0	56.765	1662100000	2.09881	2.54538	1.93934	1.82773	1.81481	2.0539	1.81187	1.84096	4.16041	5.60913	1.0927
PGK1	Phosphoglycerate kinase 1	0.197809	0.221464	1.16592	P00558-2;P00558;P07205	P00558-2;P00558	4	7	13.1				4	4	13.1	13.1	41.428	0	33.883	466700000	-0.629856	-0.131536	0.829599	0.19628	-0.563215	-0.735151	0.677822	-0.000823975	-1.7872	-1.97397	1.91175
RPL8	60S ribosomal protein L8	0.536043	0.221251	1.16574	P62917	P62917	7	13	25.7				7	7	25.7	25.7	28.024	0	25.317	1906300000	2.19075	3.03338	2.51917	2.54669	2.5001	2.18819	2.47646	2.24023	3.25923	4.56339	2.60999
NUP133	Nuclear pore complex protein Nup133	0.176791	0.221138	1.16565	Q8WUM0	Q8WUM0	2	2	2.1				2	2	2.1	2.1	128.98	0	1.9036	75599000	-2.68692	-0.736288	-2.48639	-2.79173	-2.43122	-2.24408	-2.49297	-2.41761	-4.41843	-1.19728	-2.75816
SPTBN2	Spectrin beta chain, non-erythrocytic 2	0.355832	0.220796	1.16538	O15020-2;O15020	O15020-2;O15020	2	2	0.6				2	2	0.6	0.6	268.31	0.0014826	1.6087	0	-0.0733891	0.737764	-0.00408936	-0.506578	-0.096386	-0.361298	-0.221228	-0.0505638	-1.4759	NaN	-0.318727
RPL5	60S ribosomal protein L5	0.201456	0.22052	1.16515	P46777	P46777	3	3	11.8				3	3	11.8	11.8	34.362	0	2.7164	196250000	-1.36728	0.284773	-1.13812	-1.60054	-1.18646	-1.39974	-0.968252	-1.1488	-1.98815	NaN	0.0559721
DDX1	ATP-dependent RNA helicase DDX1	0.326734	0.219237	1.16412	Q92499;Q92499-3;Q92499-2	Q92499;Q92499-3;Q92499-2	2	3	3.9				2	2	3.9	3.9	82.431	0	29.336	25772000	-2.74307	-1.61149	-2.75388	-2.54584	-2.72087	-2.78924	-2.39031	-2.63082	-6.50219	NaN	-0.920354
HNRNPA1;HNRNPA1L2	Heterogeneous nuclear ribonucleoprotein A1;Heterogeneous nuclear ribonucleoprotein A1, N-terminally processed;Heterogeneous nuclear ribonucleoprotein A1-like 2	0.585132	0.212115	1.15838	P09651-3;P09651-2;P09651;Q32P51	P09651-3;P09651-2;P09651;Q32P51	4	4	22.5				4	4	22.5	22.5	29.386	0	5.7139	188250000	-0.7903	-1.13276	-0.680666	-0.890392	-1.3382	-1.26843	-0.717321	-1.01862	-2.55404	-1.76814	0.240552
SFXN4	Sideroflexin-4	0.404052	0.208156	1.15521	Q6P4A7-2;Q6P4A7	Q6P4A7-2;Q6P4A7	2	2	9.8				2	2	9.8	9.8	34.104	0	4.6173	49680000	-1.3471	-1.55169	-1.61245	-1.53814	-1.27959	-1.40891	-2.05247	-2.14101	NaN	NaN	-5.8991
RPL14	60S ribosomal protein L14	0.356666	0.205511	1.15309	P50914	P50914	3	9	16.3				3	3	16.3	16.3	23.432	0	60.711	2518600000	1.91957	2.84164	1.84666	1.80068	1.95544	1.87052	1.88378	1.87677	-1.91374	-2.48667	2.30362
RPS15	40S ribosomal protein S15	0.419508	0.202731	1.15087	P62841	P62841	4	9	37.2				4	4	37.2	37.2	17.04	0	48.624	1827100000	2.9807	3.54448	2.76833	2.54582	2.75712	2.77549	2.75646	2.73934	0.810811	NaN	2.22357
HNRNPD	Heterogeneous nuclear ribonucleoprotein D0	0.728256	0.201491	1.14989	Q14103-4;Q14103-3;Q14103-2;Q14103	Q14103-4;Q14103-3;Q14103-2;Q14103	2	4	11.1				3	3	11.1	8.4	30.672	0	7.2049	211670000	-0.487337	-0.532654	-0.258917	-0.436239	-0.883179	-0.760004	-0.332899	-0.545031	-3.82751	-4.53177	0.700812
XRCC5	X-ray repair cross-complementing protein 5	0.474922	0.200141	1.14881	P13010	P13010	3	4	5.9				3	3	5.9	5.9	82.704	0	6.8231	77238000	-1.65339	-1.82884	-1.425	-1.5356	-1.89819	-2.18009	-1.35899	-1.80612	-0.795177	-1.0171	-0.156354
PSMA5	Proteasome subunit alpha type-5	0.315729	0.198204	1.14727	P28066;P28066-2	P28066;P28066-2	2	3	12				2	2	12	12	26.411	0	127.95	207200000	-1.81762	-0.695953	-1.59	-1.786	-1.7063	-1.62436	-1.61509	-1.73662	-1.59398	-1.56559	-0.765599
NOP56	Nucleolar protein 56	1.18427	0.19253	1.14277	O00567	O00567	4	7	5.9				4	4	5.9	5.9	66.049	0	7.7174	272270000	0.505266	0.194674	0.321716	0.246881	-0.0222702	0.133762	0.167355	0.21957	0.741323	0.419098	0.757831
NAP1L1	Nucleosome assembly protein 1-like 1	0.468038	0.188283	1.13941	P55209;P55209-2;P55209-3	P55209;P55209-2;P55209-3	2	8	10.2				4	4	10.2	7.4	45.374	0	10.512	414320000	0.522346	0.14822	0.558937	0.486164	0.116127	-0.0556488	0.671551	0.230507	1.05766	-2.1934	1.6596
RPL37A;RPL37AP8	60S ribosomal protein L37a;Putative 60S ribosomal protein L37a-like protein	0.220379	0.187469	1.13876	P61513;A6NKH3	P61513;A6NKH3	2	3	21.7				2	2	21.7	21.7	10.275	0	2.258	208340000	-0.614452	0.638628	-0.707825	-0.800463	-0.51701	-0.522289	-0.524916	-0.669775	0.476214	0.178964	0.110291
CKB	Creatine kinase B-type	0.197636	0.186575	1.13806	P12277	P12277	6	9	23.4				6	6	23.4	23.4	42.644	0	32.395	375810000	-0.818123	-0.8643	-0.0105228	-0.188404	-0.922588	-1.26776	0.149544	-0.586843	-1.07805	-3.49296	0.680602
EXOC4	Exocyst complex component 4	0.527136	0.185915	1.13754	Q96A65;Q96A65-2	Q96A65;Q96A65-2	2	2	1.7				2	2	1.7	1.7	110.5	0	3.5738	68125000	-3.10232	-2.56215	-3.24054	-2.92361	-2.97141	-3.11235	-3.31045	-3.17806	-3.25337	-1.13622	-3.5369
NSUN2	tRNA (cytosine(34)-C(5))-methyltransferase	0.20259	0.184888	1.13673	Q08J23;Q08J23-2;Q08J23-3	Q08J23;Q08J23-2;Q08J23-3	4	6	7.2				4	4	7.2	7.2	86.47	0	7.3127	122900000	-1.44011	-0.179079	-1.40151	-1.08821	-0.586441	-1.33586	-1.44245	-1.48371	-1.76053	-2.36959	-0.997006
ARID1A	AT-rich interactive domain-containing protein 1A	0.76128	0.183187	1.13539	O14497-3;O14497-2;O14497	O14497-3;O14497-2;O14497	2	2	1.6				2	2	1.6	1.6	205.92	0	2.9393	107290000	-1.66419	-1.63501	-1.4895	-1.225	-1.80134	-1.70217	-1.50767	-1.73526	-2.97452	NaN	-0.883285
ATP13A1	Manganese-transporting ATPase 13A1	0.494258	0.183021	1.13526	Q9HD20-2;Q9HD20	Q9HD20-2;Q9HD20	2	4	1.5				2	2	1.5	1.5	121.11	0	2.4803	66894000	-2.39856	-1.82756	-2.3867	-1.94131	-2.17556	-2.18847	-2.46152	-2.46065	-1.10202	-0.976894	-2.34691
NUDC	Nuclear migration protein nudC	0.594824	0.181484	1.13405	Q9Y266	Q9Y266	2	5	6.3				2	2	6.3	6.3	38.242	0	3.7523	127160000	-0.951029	-1.0265	-0.827238	-0.692471	-1.11962	-1.36505	-0.782614	-0.955887	-1.18641	NaN	-0.273944
SRRM2	Serine/arginine repetitive matrix protein 2	0.584384	0.181293	1.1339	Q9UQ35;Q9UQ35-3;Q9UQ35-2	Q9UQ35;Q9UQ35-3;Q9UQ35-2	2	2	1.1				2	2	1.1	1.1	299.61	0.0021692	1.4898	62637000	-3.81962	-3.39471	-3.96621	-3.46186	-3.78332	-3.74475	-3.89175	-3.94777	-3.67174	NaN	-3.00592
HNRNPM	Heterogeneous nuclear ribonucleoprotein M	0.803451	0.181033	1.1337	P52272-2;P52272	P52272-2;P52272	33	59	46.3				33	33	46.3	46.3	73.62	0	62.43	6242200000	4.22953	3.95959	4.39445	3.93128	3.96163	3.90805	3.96913	3.9519	3.66666	3.02495	4.20687
P4HB	Protein disulfide-isomerase	0.515336	0.180147	1.133	P07237	P07237	6	10	11.2				6	6	11.2	11.2	57.116	0	42.729	382670000	0.791941	1.43729	0.780058	0.902433	0.783306	0.900925	0.704323	0.802584	0.315604	-0.205137	1.90216
PPHLN1	Periphilin-1	1.00742	0.179095	1.13217	Q8NEY8-6;Q8NEY8-9;Q8NEY8-8;Q8NEY8-2;Q8NEY8-7;Q8NEY8-5;Q8NEY8-3;Q8NEY8	Q8NEY8-6;Q8NEY8-9;Q8NEY8-8;Q8NEY8-2;Q8NEY8-7;Q8NEY8-5;Q8NEY8-3;Q8NEY8	2	2	6.6				2	2	6.6	6.6	36.952	0	2.7767	8527200	-1.93843	-2.17569	-2.20332	-2.32763	-2.3421	-2.22222	-2.41602	-2.38111	NaN	NaN	-2.43655
DDX46	Probable ATP-dependent RNA helicase DDX46	1.25931	0.17879	1.13193	Q7L014	Q7L014	2	2	2.6				2	2	2.6	2.6	117.36	0	4.1517	29765000	-3.2956	-3.13644	-3.06978	-3.13532	-3.44875	-3.3317	-3.17983	-3.392	-1.46984	-0.67431	-2.01197
LARP1	La-related protein 1	1.4285	0.177997	1.13131	Q6PKG0;Q6PKG0-3	Q6PKG0;Q6PKG0-3	3	4	6				4	4	6	3.7	123.51	0	3.6276	70765000	-2.04074	-1.85809	-2.0406	-2.11161	-2.1306	-2.12701	-2.21444	-2.29097	-0.474021	0.729511	-1.3861
AHCY	Adenosylhomocysteinase	1.10254	0.176537	1.13017	P23526;P23526-2	P23526;P23526-2	7	10	17.8				7	7	17.8	17.8	47.716	0	9.0756	534280000	1.22965	1.59791	1.26894	1.37883	1.21065	1.21596	1.17191	1.17068	0.679888	0.89873	1.92803
FUS	RNA-binding protein FUS	0.433262	0.174081	1.12825	P35637-2;P35637	P35637-2;P35637	4	11	13.9				5	5	13.9	13.9	53.354	0	26.905	1015500000	2.70351	2.40853	2.90449	2.59595	2.48184	2.83993	2.12401	2.47036	3.33076	-1.85097	3.95298
EXOSC4	Exosome complex component RRP41	0.936614	0.173803	1.12803	Q9NPD3	Q9NPD3	2	2	8.2				2	2	8.2	8.2	26.383	0	2.8433	39460000	-3.97159	-3.82319	-4.21242	-3.83407	-4.1531	-4.05314	-4.16999	-4.16026	-4.00314	-2.97633	-5.10505
CDKAL1	Threonylcarbamoyladenosine tRNA methylthiotransferase	0.137551	0.172854	1.12729	Q5VV42;Q5VV42-2;Q5VV42-3	Q5VV42;Q5VV42-2	3	5	9.7				3	3	9.7	9.7	65.111	0	7.9849	34102000	-3.15079	-1.37471	-3.20102	-3.25061	-2.77516	-2.64307	-3.23076	-3.01956	-2.46743	NaN	-4.06984
RUSC2	Iporin	0.495053	0.172072	1.12668	Q8N2Y8	Q8N2Y8	2	2	1.3				2	2	1.3	1.3	161.22	0.0045752	1.15	80777000	-1.47758	-0.802811	-1.40337	-1.33227	-1.32642	-1.39147	-1.49777	-1.48866	-2.89521	NaN	-1.61286
PRDX3	Thioredoxin-dependent peroxide reductase, mitochondrial	0.318222	0.171099	1.12592	P30048-2;P30048	P30048-2;P30048	2	3	10.5				2	2	10.5	10.5	25.838	0	7.1211	107310000	-1.05355	-0.185469	-1.11807	-1.0911	-0.990299	-1.08891	-0.981888	-1.07148	-3.13931	NaN	-1.57368
SMARCA5;SMARCA1	SWI/SNF-related matrix-associated actin-dependent regulator of chromatin subfamily A member 5;Probable global transcription activator SNF2L1	0.800396	0.171007	1.12584	O60264;P28370-2;P28370	O60264;P28370-2;P28370	2	3	1.9				2	2	1.9	1.9	121.9	0	3.7718	84990000	-1.19533	-1.4314	-1.54457	-1.64328	-1.66144	-1.52287	-1.72774	-1.58655	-0.279793	-4.09991	-1.00214
HSD17B4	Peroxisomal multifunctional enzyme type 2;(3R)-hydroxyacyl-CoA dehydrogenase;Enoyl-CoA hydratase 2	0.561548	0.170307	1.1253	P51659-3;P51659;P51659-2	P51659-3;P51659;P51659-2	2	2	3.8				2	2	3.8	3.8	77.869	0	4.8051	79931000	-2.45204	-2.24027	-1.82297	-2.2447	-2.30037	-2.51281	-2.29607	-2.33196	-2.5845	NaN	-1.41237
ENO1	Alpha-enolase	0.179233	0.16399	1.12038	P06733;P06733-2	P06733;P06733-2	13	28	41				15	15	41	35.9	47.168	0	141.54	4318700000	2.7187	2.85374	3.7701	3.26091	2.63346	2.49839	3.67051	3.14514	2.62517	2.67362	4.93777
TBCA	Tubulin-specific chaperone A	0.0842342	0.161843	1.11872	O75347;O75347-2	O75347;O75347-2	2	3	26.9				2	2	26.9	26.9	12.855	0	2.9011	75228000	-3.42485	-2.63057	-1.04521	-1.82627	-2.87245	-3.32766	-1.16393	-2.21023	-0.845024	-1.63538	0.371045
ADRM1	Proteasomal ubiquitin receptor ADRM1	0.163858	0.161371	1.11835	Q16186	Q16186	2	2	10.8				3	3	10.8	7.1	42.153	0	3.3067	112420000	-2.32066	-0.85302	-2.42316	-2.33922	-2.02715	-2.17558	-2.20404	-2.17477	-4.60942	NaN	-3.15295
EIF2S3;EIF2S3L	Eukaryotic translation initiation factor 2 subunit 3;Putative eukaryotic translation initiation factor 2 subunit 3-like protein	0.71119	0.16022	1.11746	P41091;Q2VIR3;Q2VIR3-2	P41091;Q2VIR3	6	8	17.2				6	6	17.2	17.2	51.109	0	12.994	337670000	0.531925	1.00855	0.61997	0.68759	0.509333	0.643431	0.569431	0.484964	-0.537212	1.46096	1.57609
NCL	Nucleolin	0.288401	0.159997	1.11728	P19338	P19338	7	13	15.2				7	7	15.2	15.2	76.613	0	14.542	996860000	1.16674	1.07415	1.67911	1.40661	0.957439	0.882208	1.71068	1.13629	1.39594	-0.40045	2.64178
THRAP3	Thyroid hormone receptor-associated protein 3	0.307717	0.159426	1.11684	Q9Y2W1	Q9Y2W1	5	10	8.1				5	5	8.1	8.1	108.66	0	16.012	427720000	0.740746	0.423542	1.04149	1.44012	0.772015	0.679234	0.768997	0.787941	1.20369	-0.119448	2.05166
PDIA3	Protein disulfide-isomerase A3	0.242826	0.159275	1.11673	P30101	P30101	3	3	6.1				3	3	6.1	6.1	56.782	0	2.1417	46900000	-0.912733	-0.783297	0.00678825	-0.441151	-0.801344	-1.10611	-0.320637	-0.539402	-2.227	NaN	0.433114
NEFM	Neurofilament medium polypeptide	0.464786	0.15852	1.11614	P07197;P07197-2	P07197	7	11	10.7				9	7	9.4	9.4	102.47	0	19.99	573090000	0.544207	-0.12096	0.208319	-0.0471401	-0.0880737	0.0752106	-0.0175419	-0.0192509	0.644089	0.590466	0.763438
MTOR	Serine/threonine-protein kinase mTOR	0.394036	0.158443	1.11608	P42345	P42345	2	2	1.4				2	2	1.4	1.4	288.89	0	6.1545	34142000	-2.82292	-2.71451	-2.89096	-2.15768	-2.79682	-2.65346	-2.924	-2.84557	-1.86619	NaN	-2.89575
NHP2L1	NHP2-like protein 1;NHP2-like protein 1, N-terminally processed	0.663793	0.15738	1.11526	P55769	P55769	2	3	18.8				2	2	18.8	18.8	14.173	0	73.415	136040000	-0.783155	-1.27753	-0.992208	-1.16739	-1.3082	-1.22482	-1.13645	-1.18035	-1.84496	NaN	-0.251809
PHB	Prohibitin	0.263007	0.156744	1.11477	P35232;P35232-2	P35232	20	43	76.5				20	20	76.5	76.5	29.804	0	160.3	14316000000	4.68926	4.84392	4.64025	5.6685	4.87059	4.82275	4.66077	4.86086	4.01321	3.70354	4.71894
RALGAPA1	Ral GTPase-activating protein subunit alpha-1	0.43046	0.155753	1.114	Q6GYQ0-4;Q6GYQ0;Q6GYQ0-7;Q6GYQ0-5;Q6GYQ0-6;Q6GYQ0-2;Q6GYQ0-3	Q6GYQ0-4;Q6GYQ0;Q6GYQ0-7;Q6GYQ0-5;Q6GYQ0-6;Q6GYQ0-2;Q6GYQ0-3	2	3	0.9				2	2	0.9	0.9	221.1	0.0021583	1.4834	2636900000	0	0.478668	-0.207432	0.302717	0.0385704	-0.156368	-0.00123405	0.0699749	-0.286325	NaN	1.77417
LMNA	Prelamin-A/C;Lamin-A/C	0.458397	0.155648	1.11392	P02545-3;P02545;P02545-2;P02545-6;P02545-5;P02545-4	P02545-3;P02545;P02545-2;P02545-6;P02545-5;P02545-4	13	26	24.3				15	13	24.1	24.1	70.66	0	80.097	1215700000	2.38098	2.31885	2.51379	1.96036	2.01572	2.39044	2.18569	1.95954	2.28922	2.61687	2.86669
SRP14	Signal recognition particle 14 kDa protein	1.82915	0.154609	1.11312	P37108	P37108	2	6	19.9				2	2	19.9	19.9	14.57	0	18.87	402220000	0.714521	0.813786	0.825594	0.66466	0.532156	0.634455	0.601143	0.63237	0.16447	-0.728855	0.0308352
SEC23B	Protein transport protein Sec23B	0.456111	0.154598	1.11311	Q15437	Q15437	6	13	13.6				7	6	12.3	12.3	86.478	0	53.797	419000000	0.14287	0.550215	-0.000705719	0.449684	0.210878	0.308428	-0.0640888	0.0684528	-0.599789	0.435968	0.835134
NOMO1;NOMO2;NOMO3	Nodal modulator 1;Nodal modulator 2;Nodal modulator 3	0.231485	0.154037	1.11268	Q15155;Q5JPE7-3;Q5JPE7-2;P69849;Q5JPE7	Q15155;Q5JPE7-3;Q5JPE7-2;P69849;Q5JPE7	10	17	13.3				10	10	13.3	13.3	134.32	0	50.061	469550000	0.663504	1.69288	0.574083	0.684528	0.77494	0.866779	0.642677	0.714453	0.641936	0	-0.223655
RPL4	60S ribosomal protein L4	0.695209	0.153847	1.11253	P36578	P36578	15	28	35.8				15	15	35.8	35.8	47.697	0	53.491	6357900000	3.915	4.30358	3.86732	3.91474	3.93393	3.84844	3.83519	3.76769	4.37879	5.08271	4.21917
MON2	Protein MON2 homolog	0.700721	0.152566	1.11154	Q7Z3U7-2;Q7Z3U7-6;Q7Z3U7-5;Q7Z3U7	Q7Z3U7-2;Q7Z3U7-6;Q7Z3U7-5;Q7Z3U7	2	3	1.4				2	2	1.4	1.4	185.85	0.004645	1.203	124740000	-0.929398	-0.552299	-0.984608	-0.83955	-0.878525	-0.953169	-1.08962	-0.994802	-0.249439	0.60788	-2.05851
PRPF8	Pre-mRNA-processing-splicing factor 8	0.452328	0.150671	1.11009	Q6P2Q9	Q6P2Q9	7	10	3.6				7	7	3.6	3.6	273.6	0	15.667	236820000	0.384842	0.9461	0.270483	0.468142	0.318365	0.407217	0.373882	0.36742	0.87575	0.290563	0.979768
TPP2	Tripeptidyl-peptidase 2	0.220434	0.150155	1.10969	P29144	P29144	4	5	4.7				5	5	4.7	3.4	138.35	0	4.9061	190580000	0.5049	1.46118	0.539822	0.426699	0.636597	0.906807	0.372517	0.416056	-0.844945	0.134954	-1.13101
RPSA	40S ribosomal protein SA	0.875904	0.148555	1.10846	P08865	P08865	3	5	24.1				4	4	24.1	18.6	32.854	0	156.82	214210000	-0.814476	-0.513927	-0.739622	-0.710981	-0.966043	-0.889395	-0.699596	-0.818193	-0.700014	NaN	0.365525
TRIM28	Transcription intermediary factor 1-beta	0.236629	0.14804	1.10806	Q13263-2;Q13263	Q13263-2;Q13263	9	12	24.6				9	9	24.6	24.6	79.473	0	18.643	415530000	0.312904	0.126972	0.485701	1.25969	0.330988	0.305937	0.4806	0.475578	0.343043	0.414286	1.27204
XAB2	Pre-mRNA-splicing factor SYF1	0.336418	0.144697	1.1055	Q9HCS7	Q9HCS7	2	2	2.6				2	2	2.6	2.6	100.01	0	2.8886	39249000	-2.83165	-2.0858	-2.80352	-2.75943	-2.7334	-2.7242	-2.89154	-2.71005	-2.40353	NaN	-2.28679
MTDH	Protein LYRIC	0.276727	0.143421	1.10452	Q86UE4	Q86UE4	10	15	24.1				10	10	24.1	24.1	63.836	0	110.24	538840000	0.882832	1.7294	0.913773	0.848576	0.972862	1.01328	0.866058	0.948689	0.649078	0.752653	0.499358
YWHAH	14-3-3 protein eta	1.37067	0.143344	1.10446	Q04917	Q04917	2	3	15.4				3	2	15.4	15.4	28.218	0	9.9825	78250000	-2.49594	-2.24281	-2.34592	-2.33184	-2.50897	-2.45874	-2.4765	-2.54568	NaN	-1.62097	-2.37259
PGD	6-phosphogluconate dehydrogenase, decarboxylating	1.41535	0.142809	1.10405	P52209-2;P52209	P52209-2;P52209	2	5	8.1				2	2	8.1	8.1	51.872	0	30.167	86539000	-1.99231	-1.85793	-1.92446	-1.83933	-2.12255	-2.10796	-1.95074	-2.00401	-2.43174	-5.01201	-0.481038
FXR1	Fragile X mental retardation syndrome-related protein 1	2.08904	0.142456	1.10378	P51114-2;P51114;P51114-3;Q06787-8;Q06787-6;Q06787-2;Q06787-4;Q06787-5;Q06787-9;Q06787-7;Q06787-3;Q06787	P51114-2;P51114;P51114-3	2	8	7.2				3	3	7.2	5.8	60.791	0	13.444	301930000	0.199568	0.252213	0.1495	0.156746	-0.0240173	0.0308151	0.103399	0.0780067	0.543422	-0.593386	0.958413
MYL12A;MYL12B	Myosin regulatory light chain 12A;Myosin regulatory light chain 12B	0.818276	0.142162	1.10356	P19105;O14950	P19105;O14950	2	3	17.5				2	2	17.5	17.5	19.794	0	47.539	97830000	-1.85398	-2.05166	-1.76525	-1.92793	-1.94774	-2.14979	-1.92221	-2.14773	-0.102769	NaN	-0.675338
DYNC1H1	Cytoplasmic dynein 1 heavy chain 1	0.238803	0.142065	1.10348	Q14204	Q14204	54	78	15.9				54	54	15.9	15.9	532.4	0	245.92	5499500000	3.87823	4.84426	3.86874	3.91538	4.00126	4.05251	3.92494	3.95964	4.30392	4.83396	4.0762
PARP1	Poly [ADP-ribose] polymerase 1	0.277248	0.141953	1.1034	P09874	P09874	6	13	9.5				7	7	9.5	8.1	113.08	0	7.5884	549550000	0.723291	0.768879	1.31942	0.880301	0.57238	0.55158	1.24995	0.750164	0.964502	0.681144	2.24008
TIA1	Nucleolysin TIA-1 isoform p40	0.2695	0.140732	1.10246	P31483;P31483-2;P31483-3	P31483;P31483-2;P31483-3	3	7	22				6	6	22	16.6	42.963	0	9.0304	787520000	2.16533	1.99265	2.18014	2.91879	2.24365	2.20177	1.9885	2.26006	2.40704	-0.354971	3.54142
RPS26;RPS26P11	40S ribosomal protein S26;Putative 40S ribosomal protein S26-like 1	0.252745	0.140494	1.10228	P62854;Q5JNZ5	P62854;Q5JNZ5	4	12	37.4				4	4	37.4	37.4	13.015	0	8.329	2129000000	2.11802	2.99907	2.11589	2.11822	2.21811	2.31371	2.05073	2.20667	0.933808	0.42898	2.50974
PA2G4	Proliferation-associated protein 2G4	0.332296	0.140322	1.10215	Q9UQ80;Q9UQ80-2	Q9UQ80;Q9UQ80-2	3	5	10.4				3	3	10.4	10.4	43.786	0	7.7103	301460000	-0.827789	-0.683491	-0.225588	-0.440767	-0.835958	-0.903221	-0.3624	-0.637342	-1.65919	-1.44439	0.863347
MCM5	DNA replication licensing factor MCM5	0.918774	0.139056	1.10118	P33992	P33992	2	3	3.8				2	2	3.8	3.8	82.285	0	3.6621	102670000	-2.30043	-2.3336	-2.38891	-2.08481	-2.47772	-2.47138	-2.40224	-2.31263	-2.60812	NaN	-1.89746
TTC4	Tetratricopeptide repeat protein 4	0.496562	0.13898	1.10113	O95801	O95801	4	4	16				5	5	16	10.9	44.678	0	4.841	394370000	0.637487	0.890636	0.405619	0.452377	0.378996	0.63488	0.343935	0.472387	-0.563349	-2.86719	-0.942946
NDUFAF3	NADH dehydrogenase [ubiquinone] 1 alpha subcomplex assembly factor 3	0.726891	0.138625	1.10086	Q9BU61;Q9BU61-2	Q9BU61;Q9BU61-2	3	4	28.3				3	3	28.3	28.3	20.35	0	41.648	158110000	-0.361994	-0.38863	-0.459867	-0.592428	-0.430117	-0.507586	-0.785019	-0.634699	-0.416799	NaN	-1.04299
KTN1	Kinectin	1.01361	0.138068	1.10043	Q86UP2-2;Q86UP2-4;Q86UP2;Q86UP2-3	Q86UP2-2;Q86UP2-4;Q86UP2;Q86UP2-3	13	15	12.5				13	13	12.5	12.5	149.61	0	40.656	625210000	0.970921	1.14194	0.970592	1.09648	1.0307	0.960871	0.785675	0.850424	1.08635	0.284852	1.18501
SCAMP4	Secretory carrier-associated membrane protein 4	0.451941	0.135781	1.09869	Q969E2;Q969E2-2;Q969E2-3	Q969E2;Q969E2-2	2	4	22.3				3	3	22.3	17	25.728	0	23.938	474770000	-1.70335	-1.29919	-1.7058	-1.83147	-1.91174	-1.62122	-1.86235	-1.68761	-1.67472	NaN	-3.41633
ENO3	Beta-enolase	0.572196	0.135652	1.09859	P13929-3;P13929;P13929-2	P13929-3;P13929;P13929-2	2	3	21.5				4	2	11.3	11.3	42.248	0	15.471	352800000	0.275568	0.653399	0.392815	0.521425	0.391552	0.487242	0.134863	0.286942	0.335108	NaN	0.85225
GADD45GIP1	Growth arrest and DNA damage-inducible proteins-interacting protein 1	0.56007	0.134635	1.09782	Q8TAE8	Q8TAE8	3	4	21.2				3	3	21.2	21.2	25.384	0	10.316	88449000	-2.50698	-2.06218	-2.48106	-2.45017	-2.5537	-2.59836	-2.45582	-2.43105	-5.27629	-2.95922	-1.2996
TPI1	Triosephosphate isomerase	0.29642	0.13427	1.09754	P60174-4;P60174-1;P60174	P60174-4;P60174-1;P60174	2	3	12				2	2	12	12	17.958	0	10.75	102790000	-2.01489	-1.61362	-1.36664	-1.5006	-1.92833	-2.00975	-1.4586	-1.63616	-2.13449	NaN	-0.180251
RCN1	Reticulocalbin-1	0.217659	0.133003	1.09657	Q15293;Q15293-2	Q15293;Q15293-2	4	6	15.7				4	4	15.7	15.7	38.89	0	16.197	229100000	-0.49729	-0.781607	-0.241173	0.364368	-0.440952	-0.397589	-0.433741	-0.415432	-1.59161	0.884363	-0.203275
ERP44	Endoplasmic reticulum resident protein 44	0.813341	0.132177	1.09595	Q9BS26	Q9BS26	2	5	4.7				2	2	4.7	4.7	46.971	0	3.2947	397370000	0.200169	0.377207	0.0195255	0.18372	0.00091362	0.130499	0.00504303	0.115458	0.990916	-1.3395	1.35992
SYNCRIP	Heterogeneous nuclear ribonucleoprotein Q	0.267327	0.132054	1.09585	O60506-4;O60506-3;O60506-2;O60506;O60506-5	O60506-4;O60506-3;O60506-2;O60506;O60506-5	3	12	10.8				5	5	10.8	6.5	58.735	0	22.67	268440000	0.282204	-0.227093	0.365099	0.30258	-0.160866	-0.157658	0.478363	0.0347328	-0.250373	2.00242	1.38081
MBLAC2	Metallo-beta-lactamase domain-containing protein 2	0.386717	0.129172	1.09367	Q68D91-2;Q68D91	Q68D91-2;Q68D91	3	3	18.1				3	3	18.1	18.1	22.432	0	11.887	20643000	-3.186	-2.91548	-3.4452	-3.01568	-3.09663	-3.15902	-3.49004	-3.33336	-1.39644	7.03759	-2.99224
TIMM23;TIMM23B	Mitochondrial import inner membrane translocase subunit Tim23;Putative mitochondrial import inner membrane translocase subunit Tim23B	0.240771	0.129001	1.09354	O14925;Q5SRD1	O14925;Q5SRD1	3	11	21.5				3	3	21.5	21.5	21.943	0	7.4972	346490000	0.840321	1.53088	0.612143	0.691277	0.715536	0.910295	0.669241	0.863543	0.224305	-2.11581	-0.283973
SSR3	Translocon-associated protein subunit gamma	0.313004	0.127515	1.09241	Q9UNL2;Q9UNL2-2	Q9UNL2;Q9UNL2-2	3	7	14.1				3	3	14.1	14.1	21.08	0	20.4	330240000	-0.014452	0.127272	0.0588188	0.70475	0.133829	0.143061	-0.0590858	0.148525	0.439614	0.128217	0.163472
EEF1G	Elongation factor 1-gamma	0.491807	0.1272	1.09217	P26641;P26641-2	P26641;P26641-2	12	16	31.4				12	12	31.4	31.4	50.118	0	62.769	2508900000	2.92492	2.88598	2.99104	3.07573	2.64692	2.68683	3.12348	2.91164	3.66604	NaN	4.55179
MORC3	MORC family CW-type zinc finger protein 3	0.54633	0.126294	1.09149	Q14149	Q14149	2	1	2				2	2	2	2	107.11	0.0046053	1.1765	420780000	-2.15309	-2.27887	-2.28095	-1.96798	-2.09419	-2.26848	-2.36201	-2.46139	2.90717	NaN	-1.61136
NPM1	Nucleophosmin	0.215096	0.125077	1.09057	P06748;P06748-2;P06748-3	P06748;P06748-2;P06748-3	7	12	23.1				7	7	23.1	23.1	32.575	0	19.464	2517900000	2.49373	2.2953	2.90112	2.47098	2.13877	2.10353	2.93612	2.4824	3.29892	1.75342	3.96053
TP53	Cellular tumor antigen p53	0.169452	0.125005	1.09051	P04637-2;P04637-3;P04637;P04637-8;P04637-9;P04637-7;P04637-5;P04637-6;P04637-4	P04637-2;P04637-3;P04637;P04637-8;P04637-9;P04637-7;P04637-5;P04637-6;P04637-4	3	6	13.8				3	3	13.8	13.8	37.825	0	10.91	141180000	-0.914684	-0.664579	-1.39712	-1.88962	-1.16749	-1.21431	-1.54522	-1.439	-1.13164	-0.253541	-1.65
ACTL6A	Actin-like protein 6A	0.523394	0.124783	1.09034	O96019;O96019-2;O94805	O96019;O96019-2	4	6	14.5				4	4	14.5	14.5	47.46	0	30.952	199410000	-2.47616	-2.50803	-2.38799	-2.18791	-2.46743	-2.30383	-2.68071	-2.60726	-3.70943	-1.35291	-2.11871
RTN4	Reticulon-4	0.298821	0.123732	1.08955	Q9NQC3-2;Q9NQC3-5;Q9NQC3;Q9NQC3-4;Q9NQC3-3;Q9NQC3-6	Q9NQC3-2;Q9NQC3-5;Q9NQC3;Q9NQC3-4	3	5	14.2				3	3	14.2	14.2	40.317	0	33.825	112560000	-1.38735	-1.65356	-1.52581	-0.952049	-1.32629	-1.4273	-1.70981	-1.5503	-0.769879	0.330786	-2.71178
TSPYL1	Testis-specific Y-encoded-like protein 1	0.939272	0.122125	1.08834	Q9H0U9	Q9H0U9	2	2	9.2				2	2	9.2	9.2	49.192	0	55.273	25327000	-4.06218	-4.04941	-4.02942	-3.89065	-4.17955	-3.98325	-4.22927	-4.12808	-2.83266	-1.42963	-5.20442
SCAMP3	Secretory carrier-associated membrane protein 3	0.1631	0.121855	1.08813	O14828;O14828-2	O14828;O14828-2	4	7	21.6				4	4	21.6	21.6	38.287	0	5.8376	560880000	0.168736	1.19006	0.0456448	0.0220852	0.380278	0.318964	0.0899906	0.149874	0.567915	1.35279	-0.0830698
TOR1AIP1	Torsin-1A-interacting protein 1	0.387547	0.121058	1.08753	Q5JTV8-3;Q5JTV8;Q5JTV8-2	Q5JTV8-3;Q5JTV8	3	3	6.7				3	3	6.7	6.7	66.319	0	7.1463	69778000	-2.2597	-2.87721	-2.49329	-2.58176	-2.627	-2.60732	-2.81849	-2.64338	-6.29005	NaN	-2.10448
PCNA	Proliferating cell nuclear antigen	0.975463	0.120816	1.08735	P12004	P12004	8	13	34.1				8	8	34.1	34.1	28.768	0	9.7594	534140000	1.21461	1.43732	1.46806	1.41613	1.20946	1.25116	1.33833	1.25391	0.505375	-1.51835	2.17988
OLFML3	Olfactomedin-like protein 3	0.524045	0.119862	1.08663	Q9NRN5;Q9NRN5-3;Q9NRN5-2	Q9NRN5;Q9NRN5-3;Q9NRN5-2	3	5	9.1				3	3	9.1	9.1	46.01	0	13	200740000	-0.821066	-0.729107	-0.879417	-0.410646	-0.823154	-0.842955	-0.860607	-0.792967	1.97828	3.3126	-0.204167
DPYSL3	Dihydropyrimidinase-related protein 3	0.383295	0.118683	1.08574	Q14195;Q14195-2	Q14195;Q14195-2	2	2	7.7				3	2	4.9	4.9	61.963	0	2.5125	14258000	-1.92813	-2.11486	-1.88685	-1.49375	-1.94923	-2.07433	-1.9649	-1.90986	-3.3865	NaN	-1.61451
RPS27;RPS27L	40S ribosomal protein S27;40S ribosomal protein S27-like	0.132823	0.118542	1.08564	P42677;Q71UM5	P42677;Q71UM5	4	6	40.5				4	4	40.5	40.5	9.461	0	4.9722	6597500000	1.89411	3.06698	1.6977	1.71256	2.04286	2.14667	1.80709	1.90057	-2.04946	NaN	0.573163
RTCB	tRNA-splicing ligase RtcB homolog	0.333426	0.117925	1.08517	Q9Y3I0	Q9Y3I0	3	5	7.5				3	3	7.5	7.5	55.21	0	17.284	140340000	1.27395	1.4116	1.10633	1.0987	1.37193	1.2843	0.847111	0.915543	-3.03237	-3.41125	-0.295762
HNRNPR	Heterogeneous nuclear ribonucleoprotein R	0.16551	0.117918	1.08517	O43390-4;O43390;O43390-2;O43390-3	O43390-4;O43390;O43390-2;O43390-3	2	2	9.2				4	2	4.9	4.9	59.952	0	2.8895	28973000	-2.50173	-3.23792	-2.37313	-2.46786	-3.04078	-2.99272	-2.21617	-2.80264	-3.09523	-3.53663	-1.21637
RPS28	40S ribosomal protein S28	1.61558	0.117818	1.08509	P62857	P62857	5	8	56.5				5	5	56.5	56.5	7.8409	0	21.645	345080000	-0.231403	-0.106859	-0.199886	-0.233229	-0.370441	-0.324102	-0.245749	-0.302357	-0.498288	0.389144	0.153543
SFXN1	Sideroflexin-1	0.441461	0.114985	1.08296	Q9H9B4	Q9H9B4	7	17	35.1				8	8	35.1	29.2	35.619	0	70.155	851960000	1.90955	1.83101	1.57173	1.48556	1.70771	1.64553	1.45029	1.53438	2.2139	1.24924	1.5364
AKAP8	A-kinase anchor protein 8	0.331406	0.113309	1.08171	O43823	O43823	7	7	13.9				7	7	13.9	13.9	76.107	0	9.0405	561280000	1.26742	1.8784	1.28851	1.43277	1.36997	1.41899	1.26446	1.36043	4.34429	5.87827	1.54251
PSMD12	26S proteasome non-ATPase regulatory subunit 12	0.55514	0.111746	1.08054	O00232;O00232-2	O00232;O00232-2	3	3	9				3	3	9	9	52.904	0	12.833	273600000	0.451094	0.179144	0.12789	0.085207	0.150105	0.190607	-0.0112877	0.066927	1.93054	NaN	2.04649
RBM14	RNA-binding protein 14	0.409773	0.111437	1.0803	Q96PK6;Q96PK6-2;Q96PK6-3;Q96PK6-4	Q96PK6	12	33	28.3				15	15	28.3	22.6	69.491	0	186.24	3690800000	2.42052	2.74161	2.45341	2.26304	2.20487	2.53065	2.33617	2.36113	2.83188	1.79116	3.45728
LAS1L	Ribosomal biogenesis protein LAS1L	0.280867	0.111297	1.0802	Q9Y4W2-2;Q9Y4W2;Q9Y4W2-4;Q9Y4W2-3	Q9Y4W2-2;Q9Y4W2;Q9Y4W2-4;Q9Y4W2-3	2	4	5.4				2	2	5.4	5.4	81.242	0	12.748	15407000	-4.08113	-3.65391	-4.07177	-3.77644	-3.67819	-3.98691	-4.08972	-4.27362	-0.946582	0.897337	-4.01055
YWHAB	14-3-3 protein beta/alpha;14-3-3 protein beta/alpha, N-terminally processed	0.911986	0.111066	1.08003	P31946-2;P31946	P31946-2;P31946	2	4	27.9				6	3	20.1	13.5	27.85	0	10.065	92479000	-0.782661	-0.685385	-0.765354	-0.737928	-0.729956	-0.780369	-0.961527	-0.943741	-2.19351	-8.32212	-1.59577
XRCC6	X-ray repair cross-complementing protein 6	0.230106	0.110894	1.0799	P12956;P12956-2	P12956;P12956-2	3	5	6.2				3	3	6.2	6.2	69.842	0	27.969	231270000	-0.490728	-0.858591	-0.456404	-0.551352	-0.908087	-0.964506	-0.212463	-0.715595	-1.11756	-1.25287	0.794536
RPL34	60S ribosomal protein L34	0.589055	0.110171	1.07936	P49207	P49207	5	13	31.6				5	5	31.6	31.6	13.293	0	12.182	1184600000	1.72941	2.02403	1.664	1.79467	1.68225	1.58408	1.76634	1.73875	1.22393	1.61678	2.75079
MAT2A	S-adenosylmethionine synthase isoform type-2	0.578963	0.110065	1.07928	P31153;P31153-2	P31153;P31153-2	5	7	14.4				5	5	14.4	14.4	43.66	0	8.8863	164720000	-0.810234	-0.456821	-0.704288	-0.837423	-0.845009	-0.847105	-0.757683	-0.799232	1.42925	3.02747	-0.35201
SON	Protein SON	0.703123	0.109858	1.07912	P18583-6;P18583-2;P18583-10;P18583-3;P18583-4;P18583-7;P18583;P18583-5;P18583-9;P18583-8	P18583-6;P18583-2;P18583-10;P18583-3;P18583-4;P18583-7;P18583;P18583-5;P18583-9	5	7	5.2				6	6	5.2	4.8	228.18	0	15.803	329050000	-0.721821	-0.642334	-0.848864	-0.511091	-0.738543	-0.867744	-0.774786	-0.782467	-1.21095	NaN	-0.0304003
GNB2	Guanine nucleotide-binding protein G(I)/G(S)/G(T) subunit beta-2	0.487954	0.109681	1.07899	P62879	P62879	2	6	22.6				6	3	10	5.9	37.331	0	10.302	375420000	0.780701	0.948137	0.722996	0.519453	0.549049	0.781601	0.582703	0.619209	1.09516	0.71101	0.600678
DLST	Dihydrolipoyllysine-residue succinyltransferase component of 2-oxoglutarate dehydrogenase complex, mitochondrial	0.401931	0.109492	1.07885	P36957-2;P36957	P36957-2;P36957	2	2	4.1				2	2	4.1	4.1	39.552	0	1.7746	143350000	-1.18274	-0.706385	-1.16782	-1.15171	-1.1181	-1.1009	-1.18569	-1.24192	0.760358	1.46898	-0.43842
SHMT2	Serine hydroxymethyltransferase, mitochondrial	1.24464	0.109263	1.07868	P34897-3;P34897-2;P34897	P34897-3;P34897-2;P34897	6	12	14.5				6	6	14.5	14.5	53.454	0	25.38	1256600000	1.13509	1.24325	1.05285	1.1917	1.06052	1.09338	0.986952	1.04499	2.03964	4.24868	2.21216
STAT1	Signal transducer and activator of transcription 1-alpha/beta	1.09022	0.108326	1.07798	P42224;P42224-2	P42224;P42224-2	3	4	5.9				3	3	5.9	5.9	87.334	0	116.2	52239000	-2.23835	-2.16273	-2.11169	-2.29903	-2.30079	-2.24507	-2.39586	-2.30339	-3.08676	-1.44153	-2.39257
PCBP2;PCBP3	Poly(rC)-binding protein 2;Poly(rC)-binding protein 3	0.401442	0.107962	1.0777	Q15366-4;Q15366-5;Q15366-3;Q15366-2;Q15366-7;Q15366-8;Q15366-6;Q15366;P57721-2;P57721-3;P57721-5;P57721-4;P57721	Q15366-4;Q15366-5;Q15366-3;Q15366-2;Q15366-7;Q15366-8;Q15366-6;Q15366;P57721-2;P57721-3;P57721-5;P57721-4;P57721	5	7	39.6				9	5	25.4	25.4	34.917	0	33.849	1440400000	1.39437	1.7632	1.27929	1.26954	1.26886	1.35925	1.3631	1.28335	-0.920907	0.964158	1.37031
HNRNPF	Heterogeneous nuclear ribonucleoprotein F;Heterogeneous nuclear ribonucleoprotein F, N-terminally processed	0.294909	0.107698	1.07751	P52597	P52597	8	14	35.2				10	8	28.7	28.7	45.671	0	33.376	1064300000	0.995449	1.49709	0.919621	0.914169	1.05554	1.07398	0.804537	0.961477	0.963249	-1.28595	0.80273
RPL6	60S ribosomal protein L6	1.78891	0.1071	1.07706	Q02878	Q02878	7	9	28.5				8	8	28.5	24.7	32.728	0	6.976	2880600000	2.06704	2.00883	2.04974	1.97763	1.95752	1.8447	1.94334	1.92928	0.809815	-1.3809	2.54731
PSME1	Proteasome activator complex subunit 1	0.655903	0.106917	1.07692	Q06323;Q06323-3;Q06323-2	Q06323;Q06323-3;Q06323-2	3	5	13.3				3	3	13.3	13.3	28.723	0	3.4711	124820000	-0.256124	-0.305925	-0.429747	-0.252529	-0.454887	-0.304331	-0.589998	-0.322779	0.879764	1.85651	0.19217
RFC4	Replication factor C subunit 4	0.516072	0.106853	1.07688	P35249-2;P35249	P35249-2;P35249	2	3	5.9				2	2	5.9	5.9	33.675	0.00075815	1.6969	59328000	-1.66508	-1.44026	-1.65652	-1.77307	-1.74131	-1.56042	-1.86132	-1.79929	-3.11378	-2.06586	-2.11755
EWSR1	RNA-binding protein EWS	0.273005	0.105302	1.07572	Q01844-2;Q01844-6;Q01844-3;Q01844;Q01844-5	Q01844-2;Q01844-6;Q01844-3;Q01844;Q01844-5	2	4	5.8				2	2	5.8	5.8	61.217	0	5.845	842740000	1.56267	2.32957	1.83724	1.87075	1.8216	1.78993	1.76497	1.80251	1.56332	NaN	3.4471
CDC5L	Cell division cycle 5-like protein	0.614896	0.105229	1.07567	Q99459	Q99459	2	2	2.6				2	2	2.6	2.6	92.25	0	1.8632	18390000	-2.91944	-2.66757	-2.85321	-2.62488	-2.94815	-2.88868	-2.762	-2.88718	-0.867062	-0.600166	-2.43527
YME1L1	ATP-dependent zinc metalloprotease YME1L1	1.42738	0.1046	1.0752	Q96TA2-3;Q96TA2-2;Q96TA2	Q96TA2-3;Q96TA2-2;Q96TA2	3	4	6				3	3	6	6	75.981	0	3.3818	97409000	-0.947363	-0.820856	-0.825361	-0.785061	-0.934666	-0.945517	-0.91918	-0.997681	-0.974437	-0.283607	-0.609666
SRP9	Signal recognition particle 9 kDa protein	0.591486	0.101151	1.07263	P49458;P49458-2	P49458;P49458-2	2	3	27.9				2	2	27.9	27.9	10.112	0.0014848	1.6159	244650000	0.14365	-0.0353279	0.00357437	-0.162567	-0.129883	0.0160351	-0.228519	-0.112909	-0.666726	-1.42771	-1.14509
EIF3A	Eukaryotic translation initiation factor 3 subunit A	0.831221	0.099299	1.07125	Q14152;Q14152-2	Q14152;Q14152-2	10	14	8				10	10	8	8	166.57	0	18.378	631030000	1.29628	1.51362	1.33409	1.34084	1.23903	1.23883	1.37654	1.23323	1.12133	1.57811	1.9144
RPL23A	60S ribosomal protein L23a	0.0962548	0.0981541	1.0704	P62750	P62750	3	4	23.1				3	3	23.1	23.1	17.695	0	2.5969	222050000	-0.718126	-0.376848	0.417707	-0.188339	-0.919127	-0.475555	0.458206	-0.321747	0.752996	NaN	2.12264
PKM	Pyruvate kinase PKM	0.515132	0.0973554	1.06981	P14618;P14618-3;P30613-2;P30613	P14618;P14618-3	3	72	45.6				24	24	45.6	9.4	57.936	0	268.5	9607600000	4.39313	4.74293	4.41808	4.41467	4.3887	4.4614	4.35629	4.373	4.43188	2.80199	5.47732
TMX1	Thioredoxin-related transmembrane protein 1	0.401227	0.0971179	1.06963	Q9H3N1	Q9H3N1	4	7	15.7				4	4	15.7	15.7	31.791	0	6.9815	541480000	0.690878	1.03439	0.625437	0.945587	0.76782	0.812792	0.625851	0.701357	0.677024	-0.330084	0.695834
DHCR7	7-dehydrocholesterol reductase	1.09781	0.0968957	1.06947	Q9UBM7	Q9UBM7	2	2	3.8				2	2	3.8	3.8	54.489	0	2.538	163430000	-1.10212	-0.957863	-1.12531	-1.02784	-1.17088	-1.12891	-1.21047	-1.09045	-0.389445	-0.753185	-0.996533
ADSS	Adenylosuccinate synthetase isozyme 2	0.251533	0.0965295	1.0692	P30520	P30520	2	2	7.7				2	2	7.7	7.7	50.097	0	15.465	41638000	-2.84676	-2.70547	-2.31193	-2.46557	-2.86393	-2.76529	-2.39478	-2.69185	-0.825403	-0.405492	-1.25897
RFC2	Replication factor C subunit 2	0.247682	0.0963697	1.06908	P35250;P35250-2	P35250;P35250-2	2	2	10.5				2	2	10.5	10.5	39.157	0	3.6874	66769000	-1.88527	-1.41816	-2.03675	-1.99809	-1.78836	-1.83569	-2.04708	-2.05263	-6.27487	NaN	-1.96943
RPS23	40S ribosomal protein S23	0.279895	0.096272	1.06901	P62266	P62266	3	7	23.1				3	3	23.1	23.1	15.807	0	8.1702	2738300000	2.16494	2.50165	1.89787	1.92292	1.95918	2.07665	2.00808	2.05839	0.923537	1.91325	2.69767
SMC4	Structural maintenance of chromosomes protein 4	0.414271	0.0956078	1.06852	Q9NTJ3-2;Q9NTJ3	Q9NTJ3-2;Q9NTJ3	10	20	9.6				10	10	9.6	9.6	140.28	0	93.306	656500000	2.43485	2.03846	2.17122	2.02055	2.07843	2.12122	1.96711	2.11589	2.04937	1.68285	2.47387
PGAM1	Phosphoglycerate mutase 1	0.0935315	0.0951738	1.06819	P18669;Q8N0Y7	P18669	3	6	15.4				3	3	15.4	15.4	28.804	0	16.22	463070000	0.331629	0.431574	1.52221	0.995407	0.396626	0.269423	1.36006	0.874016	1.14018	-0.690696	2.94167
ZNF207	BUB3-interacting and GLEBS motif-containing protein ZNF207	0.318978	0.0949001	1.06799	O43670-3;O43670-2;O43670;O43670-4	O43670-3;O43670-2;O43670;O43670-4	2	1	8.4				2	2	8.4	8.4	41.559	0.0028329	1.4211	42286000	-3.04498	-2.63467	-2.99249	-3.04482	-3.22976	-2.96431	-2.86064	-3.04185	-5.4899	NaN	-2.02338
CD44	CD44 antigen	0.258453	0.0943351	1.06757	P16070;P16070-18;P16070-5;P16070-7;P16070-3;P16070-6;P16070-4;P16070-17;P16070-8;P16070-16;P16070-10;P16070-11;P16070-13;P16070-14;P16070-12;P16070-9;P16070-15	P16070;P16070-18;P16070-5;P16070-7;P16070-3;P16070-6;P16070-4;P16070-17;P16070-8;P16070-16;P16070-10;P16070-11;P16070-13;P16070-14;P16070-12;P16070-9;P16070-15	2	2	2.4				2	2	2.4	2.4	81.537	0	2.3964	79101000	-2.57953	-2.22593	-2.68024	-2.7391	-2.5852	-2.42534	-2.8759	-2.7157	NaN	-2.88253	-2.54604
ALDOA	Fructose-bisphosphate aldolase A	0.135578	0.0943174	1.06756	P04075;P04075-2;P09972;P05062	P04075;P04075-2	10	17	36				10	10	36	36	39.42	0	19.014	2395400000	2.58782	2.53265	3.25676	2.97993	2.47701	2.37853	3.24841	2.87593	2.91187	0.400062	4.37404
ADCK4	AarF domain-containing protein kinase 4	0.244124	0.0942011	1.06747	Q96D53-2;Q96D53	Q96D53-2;Q96D53	2	3	5.2				2	2	5.2	5.2	55.852	0	3.2554	55709000	-1.76744	-1.48243	-1.93824	-1.61244	-1.67403	-1.57362	-2.1343	-1.79542	-0.657335	-1.01304	-2.84231
USO1	General vesicular transport factor p115	0.173322	0.0933313	1.06683	O60763;O60763-2	O60763;O60763-2	2	3	2.6				2	2	2.6	2.6	107.89	0	2.7701	60865000	-1.88783	-1.96311	-2.72453	-2.47959	-2.35447	-2.42413	-2.20819	-2.4416	-2.25389	-0.83494	-2.22293
NME3	Nucleoside diphosphate kinase 3	0.241109	0.0932355	1.06676	Q13232	Q13232	2	2	14.2				2	2	14.2	14.2	19.015	0.002185	1.523	71560000	-3.03944	-2.57547	-3.24269	-3.17241	-3.14114	-2.98451	-3.19813	-3.07917	-7.01484	-2.43505	-4.18244
ILF3	Interleukin enhancer-binding factor 3	0.449961	0.0932035	1.06674	Q12906;Q12906-7;Q12906-5;Q12906-4;Q12906-2;Q12906-6;Q12906-3	Q12906;Q12906-7;Q12906-5;Q12906-4;Q12906-2;Q12906-6;Q12906-3	4	6	4.6				4	4	4.6	4.6	95.337	0	20.956	205440000	-0.186134	-0.108341	-0.0358791	-0.282726	-0.392435	-0.329418	-0.0433598	-0.220682	-0.273133	-0.712032	1.12928
SYNE1	Nesprin-1	0.0935536	0.0923285	1.06609	Q8NF91-4;Q8NF91;Q8NF91-12;Q8NF91-9;Q8NF91-3;Q8NF91-11;Q8NF91-8;Q8NF91-2;Q8NF91-7	Q8NF91-4;Q8NF91;Q8NF91-12;Q8NF91-9;Q8NF91-3;Q8NF91-11;Q8NF91-8;Q8NF91-2;Q8NF91-7	2	1	0.3				2	2	0.3	0.3	1005.2	0.0057692	1.094	0	-3.88729	-2.53139	-4.01005	-3.81537	-3.55376	-3.42177	-3.7704	-3.86749	-2.53601	-1.04667	NaN
NBEAL1	Neurobeachin-like protein 1	0.119696	0.0921087	1.06593	Q6ZS30-1;Q6ZS30	Q6ZS30-1;Q6ZS30	3	3	2				3	3	2	2	297.07	0	2.3203	269200000	0.0157318	-0.386745	-0.132748	0.729996	0.209856	0.215797	-0.44796	-0.119894	-0.997689	-0.45045	-4.92398
DCTPP1	dCTP pyrophosphatase 1	0.425814	0.0920596	1.06589	Q9H773	Q9H773	5	8	57.1				5	5	57.1	57.1	18.681	0	63.775	344800000	-0.785137	-0.537304	-0.902977	-0.885155	-0.906876	-0.731035	-0.921736	-0.919165	-0.377888	-1.97155	-1.22341
TBL2	Transducin beta-like protein 2	0.550009	0.0907922	1.06495	Q9Y4P3	Q9Y4P3	6	6	13.4				6	6	13.4	13.4	49.797	0	10.729	360490000	0.660995	0.827171	0.569336	0.525406	0.473612	0.651091	0.521685	0.573353	0.712371	-0.528326	-0.209487
RPS8	40S ribosomal protein S8	0.306401	0.0902634	1.06456	P62241	P62241	12	36	53.8				12	12	53.8	53.8	24.205	0	161.64	4062400000	3.53525	3.11576	3.64711	3.47537	3.4803	3.36407	3.29346	3.27462	3.73815	3.41649	3.89541
GMPS	GMP synthase [glutamine-hydrolyzing]	0.276957	0.0902338	1.06454	P49915-2;P49915	P49915-2;P49915	2	2	3				2	2	3	3	65.928	0.0092707	0.9939	14234000	-2.17721	-1.81619	-2.37394	-2.31034	-2.20275	-2.17914	-2.2485	-2.40822	-1.35767	-0.693147	-2.38221
MTHFD2	Bifunctional methylenetetrahydrofolate dehydrogenase/cyclohydrolase, mitochondrial;NAD-dependent methylenetetrahydrofolate dehydrogenase;Methenyltetrahydrofolate cyclohydrolase	0.291607	0.0887332	1.06344	P13995-2;P13995;Q9H903-3;Q9H903-1;Q9H903-5;Q9H903	P13995-2;P13995	3	4	12.1				3	3	12.1	12.1	26.849	0	3.145	142480000	-1.45544	-1.61063	-1.59584	-1.46067	-1.92688	-1.35671	-1.65961	-1.53432	-5.78348	-3.62086	-1.96312
DHX9	ATP-dependent RNA helicase A	0.318055	0.0883479	1.06315	Q08211	Q08211	6	9	6.9				6	6	6.9	6.9	140.96	0	35.992	348400000	-0.097311	-0.521521	-0.111572	-0.07127	-0.395472	-0.342894	-0.196318	-0.220383	0.351858	-1.05639	0.880908
CFL1	Cofilin-1	0.189781	0.086843	1.06204	P23528;Q9Y281-3;Q9Y281	P23528	6	9	43.4				7	7	43.4	36.7	18.502	0	31.83	1102900000	1.93767	2.0485	2.49317	2.20158	1.86741	1.89823	2.44491	2.123	-0.186902	1.83438	3.17675
TCERG1	Transcription elongation regulator 1	0.534445	0.0864797	1.06178	O14776-2;O14776	O14776-2;O14776	2	3	2.1				2	2	2.1	2.1	121.69	0	4.0914	25050000	-3.48502	-3.36304	-3.41354	-3.59792	-3.60328	-3.5646	-3.39388	-3.64367	-3.55035	NaN	-2.27081
LMNB2	Lamin-B2	0.442959	0.0861292	1.06152	Q03252	Q03252	22	39	41.7				27	22	38.5	38.5	67.688	0	79.485	3778200000	3.3791	3.21697	3.48049	3.17894	3.18479	3.35882	3.24846	3.11892	3.46078	3.12415	3.78165
BZW2	Basic leucine zipper and W2 domain-containing protein 2	0.361175	0.0860171	1.06144	Q9Y6E2;Q9Y6E2-2	Q9Y6E2	4	5	10.7				4	4	10.7	10.7	48.162	0	4.8432	653350000	-0.00161171	0.170908	-0.206385	-0.185568	-0.23835	-0.139845	-0.192854	0.00432396	-0.236888	-0.681417	-0.964538
LMF2	Lipase maturation factor 2	0.115643	0.0856862	1.06119	Q9BU23-3;Q9BU23-2;Q9BU23	Q9BU23-3;Q9BU23-2;Q9BU23	2	2	3				2	2	3	3	67.155	0.0051414	1.104	107810000	-1.74552	-2.47107	-1.81711	-1.38917	-1.79487	-1.67364	-2.39473	-1.90238	-1.84684	NaN	-3.21281
GLMN	Glomulin	0.435924	0.0841403	1.06006	Q92990;Q92990-2	Q92990;Q92990-2	2	5	3.2				3	3	3.2	3.2	68.207	0	7.7017	90018000	-1.38503	-1.38932	-1.53383	-1.15991	-1.44369	-1.39624	-1.56148	-1.40325	-2.45829	-2.33311	-2.50979
PCLO	Protein piccolo	0.0907113	0.0836992	1.05973	Q9Y6V0-2;Q9Y6V0-6;Q9Y6V0;Q9Y6V0-5;Q9Y6V0-4	Q9Y6V0-2;Q9Y6V0-6;Q9Y6V0;Q9Y6V0-5;Q9Y6V0-4	2	1	0.4				2	2	0.4	0.4	530.85	0.0056818	1.0566	0	-3.29905	-4.04475	-3.58743	-2.6521	-3.21866	-3.34344	-3.96765	-3.38838	-3.38901	-3.20589	-5.38446
USP5	Ubiquitin carboxyl-terminal hydrolase 5	0.681239	0.0829229	1.05916	P45974-2;P45974	P45974-2;P45974	6	8	12.7				7	7	12.7	10.4	93.307	0	6.7227	351190000	0.0783062	0.0878296	0.0125961	0.243824	-0.0592155	0	0.0771618	0.0729179	-0.876164	-1.69335	0.507848
MRPL3	39S ribosomal protein L3, mitochondrial	0.214685	0.0827727	1.05905	P09001	P09001	2	1	7.8				2	2	7.8	7.8	38.632	0	1.8134	18738000	-4.69801	-4.29771	-5.00496	-4.86257	-4.81436	-4.75692	-4.83916	-4.78389	NaN	-3.8439	-4.2852
SGTA	Small glutamine-rich tetratricopeptide repeat-containing protein alpha	0.342546	0.0827065	1.059	O43765	O43765	3	3	12.5				3	3	12.5	12.5	34.063	0	21.453	137270000	-1.12527	-1.48356	-1.07347	-1.40051	-1.32104	-1.40959	-1.3705	-1.3125	-3.03087	NaN	-1.39132
PLBD2	Putative phospholipase B-like 2;Putative phospholipase B-like 2 32 kDa form;Putative phospholipase B-like 2 45 kDa form	0.454866	0.0825052	1.05886	Q8NHP8-2;Q8NHP8	Q8NHP8-2;Q8NHP8	3	6	5.2				3	3	5.2	5.2	61.884	0	9.8922	913810000	1.15767	1.12175	1.05787	1.0011	1.06222	1.146	0.799301	1.00085	1.04885	-1.53105	0.766141
RANGAP1	Ran GTPase-activating protein 1	0.225418	0.0824699	1.05883	P46060	P46060	9	15	21.1				10	10	21.1	18.7	63.541	0	41.822	949770000	1.85733	2.28834	1.81219	1.64571	1.66225	1.86772	1.84218	1.90154	5.35775	7.25532	1.26935
RAC1;RAC3;RAC2	Ras-related C3 botulinum toxin substrate 1;Ras-related C3 botulinum toxin substrate 3;Ras-related C3 botulinum toxin substrate 2	0.278512	0.0810099	1.05776	P63000;P60763;P15153;P63000-2	P63000;P60763;P15153;P63000-2	2	2	15.1				3	2	9.4	9.4	21.45	0	3.4995	385670000	-2.31624	-2.65057	-2.6417	-2.2259	-2.55367	-2.4133	-2.65553	-2.53596	-3.2572	NaN	-3.11199
MYBBP1A	Myb-binding protein 1A	0.220318	0.0808139	1.05761	Q9BQG0;Q9BQG0-2	Q9BQG0;Q9BQG0-2	9	16	7.8				9	9	7.8	7.8	148.85	0	17.183	1330200000	2.3855	2.00482	2.34785	2.67397	2.20476	2.38128	2.16102	2.34184	1.69867	0.948378	1.82247
EMD	Emerin	0.490863	0.080442	1.05734	P50402	P50402	6	15	25.2				7	7	25.2	24.8	28.994	0	323.31	1024500000	1.56985	1.69816	1.42144	1.39456	1.44975	1.48779	1.37117	1.45352	1.36573	0.0375061	1.22282
BUB3	Mitotic checkpoint protein BUB3	0.206694	0.0804234	1.05733	O43684-2;O43684	O43684-2;O43684	3	7	9.8				3	3	9.8	9.8	36.954	0	4.3057	158300000	-0.514688	-0.173235	-0.307558	-0.1185	-0.531469	-0.583477	-0.0298939	-0.290834	-1.97384	-3.87744	0.771623
MTCH2	Mitochondrial carrier homolog 2	0.268115	0.0797477	1.05683	Q9Y6C9	Q9Y6C9	5	6	24.4				5	5	24.4	24.4	33.331	0	58.727	1068100000	1.49489	1.84516	1.38202	1.35974	1.42352	1.53495	1.30988	1.49449	-0.600252	2.26295	0.283858
HDLBP	Vigilin	0.315478	0.0796447	1.05676	Q00341;Q00341-2	Q00341;Q00341-2	2	2	1.7				2	2	1.7	1.7	141.45	0.0028209	1.4099	23059000	-3.19831	-3.0701	-3.05002	-3.22106	-3.32807	-3.41694	-2.98583	-3.12723	-2.95108	-1.39327	-1.90154
CDC42EP1	Cdc42 effector protein 1	0.311268	0.0795622	1.0567	Q00587-2;Q00587	Q00587-2;Q00587	2	3	7				2	2	7	7	39.686	0	2.8356	75341000	-2.44983	-2.24632	-2.50564	-2.42855	-2.36352	-2.36174	-2.75237	-2.47096	-1.82698	-1.33611	-3.55974
NCAPG2	Condensin-2 complex subunit G2	0.360465	0.0793738	1.05656	Q86XI2;Q86XI2-2	Q86XI2	3	5	2.1				3	3	2.1	2.1	130.96	0	3.4533	68225000	-1.92507	-1.7626	-1.77154	-1.56808	-1.85758	-1.70744	-1.99387	-1.78588	-0.908976	0.455338	-2.14201
MYH9	Myosin-9	0.642821	0.0786099	1.056	P35579;P35579-2;Q7Z406-5;Q7Z406-4;P35749-4;P35749-3;P35749;P35749-2;Q7Z406;Q7Z406-6;Q7Z406-2	P35579;P35579-2	14	18	9.6				15	15	9.6	9.2	226.53	0	44.185	564890000	0.485888	0.716085	0.618919	0.606489	0.516191	0.490183	0.629137	0.47743	0.977216	0.588467	1.75736
PRDX1	Peroxiredoxin-1	0.728919	0.0778322	1.05543	Q06830	Q06830	6	28	38.7				10	10	38.7	23.6	22.11	0	39.885	10755000000	4.50023	4.55927	4.43952	4.55083	4.3075	4.44018	4.49404	4.49679	3.94134	0.913319	5.04924
SRM	Spermidine synthase	0.524884	0.0772271	1.05499	P19623	P19623	2	2	5.3				2	2	5.3	5.3	33.824	0.0035112	1.3713	15412000	-3.0557	-2.87145	-3.10738	-3.06487	-3.00883	-3.06581	-3.21152	-3.12215	-3.02471	-1.93304	-2.34521
IKBIP	Inhibitor of nuclear factor kappa-B kinase-interacting protein	0.113863	0.0769639	1.0548	Q70UQ0-4;Q70UQ0-3;Q70UQ0	Q70UQ0-4	3	4	8.8				3	3	8.8	8.8	43.083	0	3.3553	144550000	-0.691315	0.253366	-0.766039	-0.710981	-0.43338	-0.495123	-0.680517	-0.613804	-0.853278	-1.49208	-0.550235
RCC2	Protein RCC2	0.3381	0.0766821	1.05459	Q9P258	Q9P258	8	14	13.6				8	8	13.6	13.6	56.084	0	9.5838	1096300000	1.97929	2.21634	2.00083	1.84027	1.7772	1.9346	2.05667	1.96153	1.82389	-1.97757	2.52355
RPL11	60S ribosomal protein L11	0.234436	0.0766463	1.05456	P62913-2;P62913	P62913-2;P62913	5	10	22				5	5	22	22	20.124	0	26.312	2166200000	2.79079	3.17373	2.71344	2.64131	2.57925	2.80185	2.81141	2.82016	2.53829	2.0311	3.35078
DDX21	Nucleolar RNA helicase 2	0.619261	0.0764556	1.05442	Q9NR30-2;Q9NR30;Q9BQ39	Q9NR30-2;Q9NR30	9	16	16.2				9	9	16.2	16.2	79.656	0	17.505	421900000	0.652203	0.414972	0.583836	0.470106	0.482567	0.401396	0.50308	0.428251	0.587709	0.459022	1.34541
VCP	Transitional endoplasmic reticulum ATPase	0.570889	0.0760336	1.05412	P55072	P55072	45	104	54.2				46	46	54.2	52.1	89.321	0	323.31	26578000000	5.46373	5.52154	5.32125	5.39819	5.35391	5.44605	5.22886	5.37175	5.12095	4.45327	6.43746
RPS12	40S ribosomal protein S12	0.525923	0.0758843	1.05401	P25398	P25398	10	19	81.8				10	10	81.8	81.8	14.515	0	49.522	5953100000	4.23705	4.2543	4.14259	4.0085	3.97855	4.11278	4.12646	4.12111	3.45658	1.51371	4.24177
ETFB	Electron transfer flavoprotein subunit beta	0.116661	0.0757704	1.05392	P38117;P38117-2	P38117;P38117-2	2	2	9.8				2	2	9.8	9.8	27.843	0	11.583	51587000	-2.32844	-2.75107	-1.97598	-2.40638	-2.5768	-2.83147	-1.9684	-2.38827	-2.15676	-1.00732	-1.00681
NDUFB4	NADH dehydrogenase [ubiquinone] 1 beta subcomplex subunit 4	0.416117	0.0751672	1.05348	O95168;O95168-2	O95168;O95168-2	5	11	38.8				5	5	38.8	38.8	15.208	0	10.421	454000000	1.30452	1.56417	1.29688	1.41405	1.26034	1.43815	1.21715	1.36332	3.22701	4.90912	2.72853
FBL	rRNA 2-O-methyltransferase fibrillarin	0.220566	0.0747561	1.05318	P22087;A6NHQ2	P22087	8	12	32.7				8	8	32.7	32.7	33.784	0	14.577	1407300000	2.63451	2.25718	2.84505	2.34178	2.4245	2.47789	2.43986	2.43724	4.56075	5.88068	2.55797
MAGOH;MAGOHB	Protein mago nashi homolog;Protein mago nashi homolog 2	0.367914	0.0743475	1.05288	P61326;P61326-2;Q96A72	P61326;P61326-2;Q96A72	2	3	19.2				2	2	19.2	19.2	17.163	0	4.8117	39025000	-3.50101	-3.53059	-3.24594	-3.219	-3.37589	-3.44771	-3.44604	-3.52429	-3.0201	-0.772294	-2.87562
GMFB	Glia maturation factor beta	0.294112	0.0739903	1.05262	P60983	P60983	2	3	21.8				3	3	21.8	20.4	16.713	0	2.7349	32049000	-3.17573	-3.53309	-3.1722	-3.10645	-3.27761	-3.22618	-3.38412	-3.39552	-2.55133	-2.47477	-2.14124
CCT7	T-complex protein 1 subunit eta	0.264375	0.0736942	1.05241	Q99832;Q99832-3;Q99832-2	Q99832;Q99832-3;Q99832-2	5	23	37				13	13	37	14.7	59.366	0	109.53	2755000000	3.5881	3.34557	3.61328	3.89504	3.48087	3.53583	3.54036	3.59016	3.65156	-0.917651	3.49034
DDX20	Probable ATP-dependent RNA helicase DDX20	0.0585073	0.0735564	1.05231	Q9UHI6;Q9UHI6-2	Q9UHI6	5	9	10.3				5	5	10.3	10.3	92.239	0	191.76	624040000	1.4545	1.82688	2.81427	1.26686	1.59554	2.59245	1.34366	1.53664	1.58461	1.82812	0.888627
ATP5O	ATP synthase subunit O, mitochondrial	0.208477	0.0732379	1.05208	P48047	P48047	8	13	46.9				8	8	46.9	46.9	23.277	0	33.781	1475300000	2.17746	2.68805	2.11065	2.21859	2.35861	2.18976	2.14374	2.20969	0.973908	-1.17804	1.98466
NASP	Nuclear autoantigenic sperm protein	0.225706	0.0729399	1.05186	P49321-2;P49321;P49321-3;P49321-4	P49321-2;P49321;P49321-3;P49321-4	4	9	8.2				4	4	8.2	8.2	48.804	0	5.519	576430000	0.411165	0.61167	0.825794	0.671467	0.379534	0.420147	0.799114	0.629541	0.192045	-3.7752	1.6192
PRPS1;PRPS1L1;PRPS2	Ribose-phosphate pyrophosphokinase 1;Ribose-phosphate pyrophosphokinase 3;Ribose-phosphate pyrophosphokinase 2	0.395431	0.072587	1.0516	P60891-2;P60891;P21108;P11908;P11908-2	P60891-2;P60891;P21108;P11908;P11908-2	2	1	12.7				2	2	12.7	12.7	27.526	0	1.8668	171010000	-1.49032	-1.30699	-1.60815	-1.63582	-1.58828	-1.52406	-1.55531	-1.66398	-1.40716	NaN	-0.311025
IMPDH2	Inosine-5-monophosphate dehydrogenase 2	0.384369	0.0724277	1.05148	P12268	P12268	3	6	5.4				3	3	5.4	5.4	55.804	0	4.8019	282720000	0.194952	0.0131664	0.282553	0.294939	0.0713863	0.0411205	0.26841	0.114983	0.44658	-6.85637	1.19901
HSP90B1	Endoplasmin	0.392772	0.0713124	1.05067	P14625;Q58FF3	P14625	29	71	37.1				31	29	35.4	35.4	92.468	0	193.39	9912300000	4.28234	4.50289	4.18214	4.19958	4.23128	4.29818	4.15669	4.19555	4.49294	3.61383	5.25821
SRSF3	Serine/arginine-rich splicing factor 3	0.13506	0.0710859	1.05051	P84103-2;P84103	P84103-2;P84103	3	4	40.3				3	3	40.3	40.3	14.203	0	3.228	124100000	-2.16179	-1.87037	-1.69865	-2.00142	-2.44849	-1.81123	-1.66459	-2.09226	-3.23842	-4.43905	-0.142129
WDR18	WD repeat-containing protein 18	1.41637	0.0710435	1.05048	Q9BV38	Q9BV38	3	5	6.2				3	3	6.2	6.2	47.405	0	4.5726	136600000	-1.04605	-1.05492	-1.09495	-1.05124	-1.07771	-1.15686	-1.10928	-1.18749	-0.663267	-1.44704	-0.578946
USMG5	Up-regulated during skeletal muscle growth protein 5	0.105389	0.0707073	1.05023	Q96IX5	Q96IX5	3	6	44.8				3	3	44.8	44.8	6.4575	0	26.988	759460000	1.56101	2.42019	1.4554	1.42201	1.62173	1.80426	1.46593	1.68386	1.66301	1.03337	0.855317
SCAMP1	Secretory carrier-associated membrane protein 1	0.378357	0.0706363	1.05018	O15126-2;O15126	O15126-2;O15126	2	2	24.8				2	2	24.8	24.8	18.042	0	23.276	68674000	-1.7304	-1.87538	-1.86971	-1.77477	-1.74561	-1.84216	-2.08956	-1.85548	-1.71455	-1.22618	-2.17131
SF3B1	Splicing factor 3B subunit 1	0.486207	0.0706296	1.05017	O75533;O75533-2	O75533	3	3	3.7				3	3	3.7	3.7	145.83	0	14.474	67695000	-2.39689	-2.34556	-2.4233	-2.51159	-2.60469	-2.56803	-2.4017	-2.38544	-2.37747	-2.0484	-1.71953
IPO4	Importin-4	0.316516	0.0696449	1.04946	Q8TEX9;Q8TEX9-2	Q8TEX9;Q8TEX9-2	6	7	9.3				6	6	9.3	9.3	118.71	0	57.849	542150000	0.10449	0.380783	-0.0679092	0.134995	0.0956917	0.0669861	0.06884	0.0422611	-3.32337	NaN	-0.819688
QKI	Protein quaking	0.364985	0.0691385	1.04909	Q96PU8-5;Q96PU8-9;Q96PU8-8;Q96PU8-6;Q96PU8-3;Q96PU8	Q96PU8-5;Q96PU8-9;Q96PU8-8;Q96PU8-6;Q96PU8-3;Q96PU8	5	10	14.8				5	5	14.8	14.8	35.232	0	35.882	1012100000	1.43659	1.51962	1.23632	1.27048	1.16804	1.34075	1.2933	1.38436	0.632678	1.0321	0.743903
CUX1	Homeobox protein cut-like 1	0.255822	0.0687113	1.04878	P39880-6;P39880-4;P39880-5;P39880-2;P39880;P39880-3;P39880-9;Q13948-9;Q13948-10;Q13948-2;Q13948	P39880-6;P39880-4;P39880-5;P39880-2;P39880;P39880-3	3	2	3.4				3	3	3.4	3.4	147.07	0	4.354	21029000	-3.52624	-3.51068	-3.46968	-3.07052	-3.4858	-3.45168	-3.49439	-3.42009	-2.64567	-2.57529	-3.31266
MSH2	DNA mismatch repair protein Msh2	0.234598	0.0672307	1.0477	P43246-2;P43246	P43246-2;P43246	3	4	3.8				3	3	3.8	3.8	97.321	0	6.1671	107700000	-0.967018	-0.938156	-0.505007	-0.879934	-0.79994	-0.832529	-0.949429	-0.97714	-1.56374	-2.85014	-0.698279
SERBP1	Plasminogen activator inhibitor 1 RNA-binding protein	0.276327	0.0667334	1.04734	Q8NC51-4;Q8NC51-3;Q8NC51-2;Q8NC51	Q8NC51-4;Q8NC51-3;Q8NC51-2;Q8NC51	5	6	16.5				5	5	16.5	16.5	42.426	0	15.323	1014600000	1.66118	1.9195	1.85169	1.70857	1.49246	1.73275	1.85974	1.78906	2.04895	-2.98886	2.23053
RPS25	40S ribosomal protein S25	0.382521	0.0666614	1.04729	P62851	P62851	4	9	26.4				4	4	26.4	26.4	13.742	0	4.9985	4741800000	2.2443	2.30725	2.10304	1.9858	2.12835	2.02282	2.12091	2.10167	-0.135088	-1.57407	2.49642
TRIP13	Pachytene checkpoint protein 2 homolog	0.233607	0.0659289	1.04676	Q15645;Q15645-2	Q15645	5	5	12.7				5	5	12.7	12.7	48.55	0	5.5343	884480000	1.56442	1.54816	1.66527	2.01145	1.6557	1.68756	1.52313	1.65919	1.99326	-1.30755	0.346097
ATXN2L	Ataxin-2-like protein	0.20124	0.0655565	1.04649	Q8WWM7-6;Q8WWM7-8;Q8WWM7-5;Q8WWM7-4;Q8WWM7-9;Q8WWM7-2;Q8WWM7;Q8WWM7-3;Q8WWM7-7;Q99700-2;Q99700-5;Q99700-4;Q99700	Q8WWM7-6;Q8WWM7-8;Q8WWM7-5;Q8WWM7-4;Q8WWM7-9;Q8WWM7-2;Q8WWM7;Q8WWM7-3;Q8WWM7-7	4	6	5.9				4	4	5.9	5.9	102.89	0	4.0839	143470000	-1.43363	-1.01309	-1.48061	-1.52499	-1.39519	-1.29803	-1.5207	-1.50063	-0.96913	0.132463	-0.168992
RPS16	40S ribosomal protein S16	0.330763	0.0654659	1.04642	P62249	P62249	11	24	55.5				11	11	55.5	55.5	16.445	0	21.4	17608000000	4.489	4.40321	4.22792	4.21978	4.18222	4.36617	4.17776	4.3519	3.668	3.06289	2.83883
PRPF4	U4/U6 small nuclear ribonucleoprotein Prp4	0.430381	0.0654635	1.04642	O43172-2;O43172	O43172-2;O43172	3	4	6.9				3	3	6.9	6.9	58.32	0	8.017	69547000	-2.59679	-2.4003	-2.6384	-2.59535	-2.58095	-2.52631	-2.69376	-2.69169	-1.64671	4.81116	-2.13177
STRAP	Serine-threonine kinase receptor-associated protein	0.425219	0.0654168	1.04639	Q9Y3F4;Q9Y3F4-2	Q9Y3F4;Q9Y3F4-2	3	3	11.7				3	3	11.7	11.7	38.438	0	8.1206	116450000	-1.12013	-1.16055	-0.951283	-1.09013	-1.24032	-1.20426	-1.0089	-1.13029	-1.86982	-3.29458	-0.608506
EIF3L	Eukaryotic translation initiation factor 3 subunit L	0.901954	0.0649471	1.04605	Q9Y262-2;Q9Y262	Q9Y262-2;Q9Y262	8	10	19.8				8	8	19.8	19.8	61.013	0	20.167	329100000	0.258358	0.170616	0.112633	0.132	0.0931244	0.151953	0.0955772	0.073164	0.292559	-1.4809	0.905124
SMARCC1	SWI/SNF complex subunit SMARCC1	1.02064	0.064898	1.04601	Q92922	Q92922	5	16	8.6				10	10	8.6	5.2	122.87	0	11.458	596330000	0.887472	0.986118	0.846882	0.851122	0.843336	0.823746	0.826202	0.818718	1.47202	8.29359	1.55112
SMARCC2	SWI/SNF complex subunit SMARCC2	0.447176	0.064466	1.0457	Q8TAQ2-2;Q8TAQ2-3;Q8TAQ2	Q8TAQ2-2;Q8TAQ2-3;Q8TAQ2	3	7	6.6				8	3	3.3	3.3	124.84	0	16.181	197300000	-0.486532	-0.665722	-0.598307	-0.629267	-0.604477	-0.552317	-0.692656	-0.788242	-2.19322	-0.21014	-0.238297
RPS20	40S ribosomal protein S20	0.162689	0.0644202	1.04566	P60866;P60866-2	P60866;P60866-2	7	19	55.5				7	7	55.5	55.5	13.373	0	13.807	5940700000	3.69469	4.18971	3.67184	3.52353	3.57063	3.78046	3.76295	3.70805	3.89871	2.56503	4.09337
AHNAK	Neuroblast differentiation-associated protein AHNAK	0.596839	0.0641356	1.04546	Q09666	Q09666	4	3	1.1				4	4	1.1	1.1	629.09	0	7.0907	43915000	-2.2092	-2.11328	-2.15623	-2.19068	-2.17556	-2.16348	-2.22235	-2.36453	-2.49474	-0.638271	-1.23235
BAX	Apoptosis regulator BAX	0.212162	0.0640459	1.04539	Q07812-5;Q07812-8;Q07812;Q07812-2;Q07812-7;Q07812-6;Q07812-4	Q07812-5;Q07812-8;Q07812;Q07812-2;Q07812-7	4	6	29.9				4	4	29.9	29.9	18.129	0	10.131	140210000	-0.0052433	0.369625	-0.0768127	-0.106867	0.115631	-0.0181637	-0.103361	-0.0695877	-0.668251	-1.9874	-0.588725
IDH2	Isocitrate dehydrogenase [NADP], mitochondrial	0.266863	0.0640025	1.04536	P48735-2;P48735	P48735-2;P48735	3	6	7.5				3	3	7.5	7.5	45.179	0	5.5064	402140000	0.78878	1.01608	0.632608	0.675905	0.676472	0.852283	0.624281	0.704332	0.89202	1.14253	1.51407
EIF3M	Eukaryotic translation initiation factor 3 subunit M	0.607468	0.0639338	1.04531	Q7L2H7;Q7L2H7-2	Q7L2H7;Q7L2H7-2	3	5	12				3	3	12	12	42.502	0	112.3	87954000	-1.98706	-2.06212	-2.11165	-1.99619	-2.21661	-2.03564	-2.05801	-2.10249	-5.14179	-3.52428	-1.39711
CALR	Calreticulin	0.70135	0.0626063	1.04435	P27797	P27797	4	5	17.3				4	4	17.3	17.3	48.141	0	13.428	306590000	0.492157	0.568081	0.647713	0.502285	0.466896	0.461817	0.562765	0.468332	0.652914	2.80099	0.957679
CCT2	T-complex protein 1 subunit beta	0.274793	0.0625067	1.04428	P78371;P78371-2	P78371;P78371-2	19	40	45.4				19	19	45.4	45.4	57.488	0	156.05	4850900000	3.60044	4.00915	3.66291	3.68118	3.62312	3.713	3.70144	3.66611	3.47306	2.23477	4.00618
POLE3	DNA polymerase epsilon subunit 3	0.204665	0.0621686	1.04403	Q9NRF9	Q9NRF9	3	6	32.7				3	3	32.7	32.7	16.859	0	12.819	359460000	0.851616	1.17515	0.673698	0.684704	0.737988	0.793936	0.742556	0.862013	1.43573	2.03351	0.0152655
EIF6	Eukaryotic translation initiation factor 6	0.208552	0.0606909	1.04297	P56537;P56537-2	P56537;P56537-2	4	7	26.9				4	4	26.9	26.9	26.599	0	26.501	172430000	-0.718599	-1.19129	-0.703796	-0.883272	-0.977009	-0.955515	-0.867811	-0.939384	-0.0542479	1.07756	-0.0503168
YLPM1	YLP motif-containing protein 1	0.418491	0.0606456	1.04293	P49750-3;P49750;P49750-4	P49750-3;P49750;P49750-4	3	4	2.4				3	3	2.4	2.4	209.48	0	5.8951	179850000	-1.0763	-1.05969	-1.01546	-1.23776	-1.2374	-1.03978	-1.18717	-1.16744	-2.31731	0.359514	-0.326388
TARS;TARSL2	Threonine--tRNA ligase, cytoplasmic;Probable threonine--tRNA ligase 2, cytoplasmic	0.47772	0.059938	1.04242	P26639;P26639-2;A2RTX5-2;A2RTX5	P26639;P26639-2;A2RTX5-2;A2RTX5	2	3	2.2				2	2	2.2	2.2	83.434	0	2.3962	126660000	-1.99834	-1.88546	-2.03938	-1.98577	-1.9684	-1.95345	-2.15021	-2.07665	-3.61385	NaN	-1.62014
CSTF2T	Cleavage stimulation factor subunit 2 tau variant	0.242784	0.0594332	1.04206	Q9H0L4	Q9H0L4	2	3	8.4				3	2	6.2	6.2	64.436	0	10.114	121950000	-5.50662	-5.52094	-5.68129	-5.76883	-5.68034	-5.76054	-5.81027	-5.46426	NaN	NaN	-6.03433
VARS	Valine--tRNA ligase	0.245213	0.0587687	1.04158	P26640;P26640-2	P26640	4	7	3.9				4	4	3.9	3.9	140.47	0	8.6636	298630000	0.258936	0.419239	0.356779	0.522451	0.427139	0.288425	0.123497	0.483269	-0.636155	-0.682008	1.48121
HCFC1;HCFC2	Host cell factor 1;HCF N-terminal chain 1;HCF N-terminal chain 2;HCF N-terminal chain 3;HCF N-terminal chain 4;HCF N-terminal chain 5;HCF N-terminal chain 6;HCF C-terminal chain 1;HCF C-terminal chain 2;HCF C-terminal chain 3;HCF C-terminal chain 4;HCF C-terminal chain 5;HCF C-terminal chain 6;Host cell factor 2	0.186476	0.0586963	1.04152	P51610-2;P51610;P51610-4;P51610-3;Q9Y5Z7	P51610-2;P51610;P51610-4;P51610-3;Q9Y5Z7	2	2	1				2	2	1	1	201.85	0	1.9442	62693000	-2.69167	-2.36814	-2.60279	-2.88867	-2.76547	-2.60853	-2.58352	-2.82852	-0.847377	-1.38001	-1.64098
TIMM17A	Mitochondrial import inner membrane translocase subunit Tim17-A	0.144594	0.0585699	1.04143	Q99595	Q99595	3	4	38.6				4	4	38.6	31.6	18.023	0	8.8259	432330000	0.199968	0.504053	0.0605125	-0.0606594	-0.0541267	0.246691	-0.03475	0.311781	0.107442	-0.0173254	-1.20534
FLNA	Filamin-A	0.608544	0.0583391	1.04127	P21333-2;P21333;O75369-5;O75369-4;O75369-6;O75369-3;O75369-2;O75369-9;O75369;O75369-8;Q14315-2;Q14315	P21333-2;P21333	22	35	13.8				22	22	13.8	13.8	280.01	0	96.036	1204000000	2.44798	2.58302	2.47633	2.42522	2.33855	2.44208	2.46259	2.45597	2.48254	2.53504	2.82969
RUVBL2	RuvB-like 2	0.639128	0.0563412	1.03983	Q9Y230;Q9Y230-2	Q9Y230;Q9Y230-2	13	22	32				13	13	32	32	51.156	0	36.845	1414100000	2.09921	2.27731	2.15795	2.23889	2.14693	2.11132	2.16912	2.12064	1.53731	2.10737	2.34104
PRDX2	Peroxiredoxin-2	0.495888	0.0562739	1.03978	P32119;P32119-2	P32119	5	9	33.8				6	5	28.3	28.3	21.892	0	10.796	1396500000	1.58373	1.60961	1.70717	1.76083	1.534	1.61116	1.68614	1.60496	1.6493	-1.31338	2.08021
SCAMP2	Secretory carrier-associated membrane protein 2	0.289346	0.0561218	1.03967	O15127	O15127	2	4	9.7				2	2	9.7	9.7	36.648	0	23.634	320490000	-0.253174	-0.0894775	-0.444832	-0.317377	-0.303946	-0.253262	-0.393496	-0.378645	-1.11983	-0.823913	-0.937417
MRPL47	39S ribosomal protein L47, mitochondrial	0.313805	0.0559516	1.03954	Q9HD33;Q9HD33-2;Q9HD33-3	Q9HD33;Q9HD33-2;Q9HD33-3	2	2	7.6				2	2	7.6	7.6	29.45	0	1.9589	120610000	-2.82614	-2.9044	-3.0049	-2.74459	-2.84148	-2.83618	-2.99541	-3.03077	-2.19875	NaN	-2.49659
RNF40	E3 ubiquitin-protein ligase BRE1B	0.224986	0.0558586	1.03948	O75150-3;O75150;O75150-4	O75150-3;O75150;O75150-4	2	2	6				4	2	3.3	3.3	94.795	0	3.6494	36203000	-3.00856	-2.94341	-3.16676	-2.99788	-2.87592	-3.0238	-3.28205	-3.15828	-1.9976	-2.52494	-2.42835
TUBB6	Tubulin beta-6 chain	0.239265	0.0556335	1.03932	Q9BUF5	Q9BUF5	3	4	22.4				9	3	9.4	9.4	49.857	0	6.9031	62411000	-1.23621	-1.01521	-1.34535	-1.31062	-1.17027	-1.24033	-1.44422	-1.27509	-3.64256	NaN	-1.98734
SUN1	SUN domain-containing protein 1	0.190247	0.055583	1.03928	O94901-6;O94901-5;O94901-8;O94901;O94901-9;O94901-4;O94901-2;O94901-7;O94901-3	O94901-6;O94901-5;O94901-8;O94901;O94901-9;O94901-4;O94901-2;O94901-7;O94901-3	2	2	7.8				2	2	7.8	7.8	76.402	0	11.184	33888000	-4.26863	-4.27281	-4.15751	-4.40521	-4.30977	-4.04986	-4.45837	-4.50848	NaN	NaN	-4.08551
NUP85	Nuclear pore complex protein Nup85	0.162625	0.0541873	1.03827	Q9BW27;Q9BW27-3	Q9BW27;Q9BW27-3	2	2	4.4				2	2	4.4	4.4	75.019	0	14.773	33946000	-2.59453	-2.66916	-2.77944	-2.27856	-2.56422	-2.50335	-2.82613	-2.64474	-2.83061	NaN	-2.80177
ARFIP2	Arfaptin-2	0.241562	0.0540314	1.03816	P53365;P53365-2;P53365-3	P53365;P53365-2;P53365-3	2	6	9.7				2	2	9.7	9.7	37.855	0	3.9402	94605000	-1.27563	-1.10686	-1.47331	-1.31554	-1.32602	-1.22752	-1.4734	-1.36053	-2.45778	-0.205389	-2.42912
HNRNPH1	Heterogeneous nuclear ribonucleoprotein H;Heterogeneous nuclear ribonucleoprotein H, N-terminally processed	0.253146	0.0534911	1.03777	P31943	P31943	10	64	48.3				17	17	48.3	33.9	49.229	0	256.08	9004600000	4.49934	4.62722	4.37871	4.30071	4.32136	4.53388	4.33571	4.40106	5.12345	6.34988	4.44737
CLTC	Clathrin heavy chain 1	0.137137	0.0529056	1.03735	Q00610-2;Q00610	Q00610-2;Q00610	31	72	30.1				40	40	30.1	24	187.89	0	237.1	7197400000	4.39376	4.85853	4.20282	4.33775	4.35041	4.46862	4.33802	4.42419	4.30719	4.59699	4.46647
EEF1D	Elongation factor 1-delta	0.407054	0.0527782	1.03726	P29692-3;P29692;P29692-4;P29692-2	P29692-3;P29692;P29692-4;P29692-2	3	4	13.2				3	3	13.2	13.2	28.558	0	20.548	184640000	-0.60305	-0.531139	-0.599146	-0.632248	-0.680428	-0.496597	-0.652586	-0.747086	0.710372	1.54734	0.667302
HNRNPK	Heterogeneous nuclear ribonucleoprotein K	0.333396	0.0523338	1.03694	P61978-3;P61978;P61978-2	P61978-3;P61978;P61978-2	8	18	20.5				8	8	20.5	20.5	48.562	0	129.59	2005200000	2.78555	2.91553	2.85239	2.77827	2.65599	2.71014	2.90836	2.84792	2.93989	0.984886	3.40075
NAPA	Alpha-soluble NSF attachment protein	0.135384	0.0519967	1.0367	P54920	P54920	2	2	10.8				2	2	10.8	10.8	33.232	0	3.1107	37098000	-1.62875	-1.09059	-1.69205	-1.6497	-1.51117	-1.57435	-1.6435	-1.54006	-0.457627	-1.52592	-1.36862
LMNB1	Lamin-B1	0.176192	0.0516591	1.03646	P20700	P20700	53	149	72.5				58	58	72.5	69.5	66.408	0	323.31	31817000000	6.45635	6.22971	6.58327	6.1582	6.22665	6.43947	6.35973	6.19504	6.10759	5.64087	7.04783
CD99	CD99 antigen	0.129948	0.0513992	1.03627	P14209-3;P14209	P14209-3;P14209	2	4	16.6				2	2	16.6	16.6	17.128	0	3.6106	206590000	-0.0772667	0.0975933	-0.454744	-0.376209	-0.432365	-0.138208	-0.319357	-0.126293	-0.0684547	-1.3206	-1.31942
BRAT1	BRCA1-associated ATM activator 1	0.128083	0.0513754	1.03625	Q6PJG6;Q6PJG6-2;Q6PJG6-3	Q6PJG6	3	3	8.5				3	3	8.5	8.5	88.118	0	9.3205	37590000	-4.20944	-4.09154	-4.33291	-3.75274	-4.26763	-3.96037	-4.31128	-4.05284	-3.10989	-0.687325	-4.77075
NEK9	Serine/threonine-protein kinase Nek9	0.161335	0.0505338	1.03565	Q8TD19	Q8TD19	2	1	3.4				2	2	3.4	3.4	107.17	0	6.7996	31624000	-3.7305	-3.22287	-3.54846	-3.5947	-3.7334	-3.50285	-3.5575	-3.50491	NaN	NaN	-3.60594
RBM39	RNA-binding protein 39	0.274417	0.0501018	1.03534	Q14498-3;Q14498-2;Q14498	Q14498-3;Q14498-2;Q14498	5	6	12				5	5	12	12	57.089	0	281.81	290110000	-1.25119	-1.3822	-1.32766	-1.06681	-1.3321	-1.21431	-1.34249	-1.33938	-2.01198	-2.72386	-1.16171
SNRPD3	Small nuclear ribonucleoprotein Sm D3	0.163621	0.0495787	1.03496	P62318-2;P62318	P62318-2;P62318	2	3	15.8				2	2	15.8	15.8	13.291	0	2.0957	363820000	0.774494	0.750042	0.985003	0.77672	0.605835	0.633038	1.05544	0.793631	-0.926371	-2.70181	2.12057
PDIA6	Protein disulfide-isomerase A6	0.734336	0.0495644	1.03495	Q15084-3;Q15084;Q15084-4;Q15084-5;Q15084-2	Q15084-3;Q15084;Q15084-4;Q15084-5;Q15084-2	7	8	16.7				7	7	16.7	16.7	47.837	0	57.34	559830000	1.05338	1.08468	1.086	0.986231	0.948021	0.980665	1.03702	1.04634	1.21666	NaN	2.34379
RAB1B	Ras-related protein Rab-1B	0.427835	0.0491428	1.03465	Q9H0U4;Q92928	Q9H0U4	5	9	72.6				11	5	42.3	42.3	22.171	0	61.922	1268600000	2.19151	2.17223	2.12077	2.16505	2.21626	2.16101	1.99096	2.08475	1.99261	-2.84198	1.79978
RBBP7	Histone-binding protein RBBP7	0.432618	0.0484409	1.03415	Q16576;Q16576-2	Q16576;Q16576-2	4	12	23.5				6	6	23.5	19.1	47.82	0	52.058	1253600000	2.59316	2.58727	2.56988	2.44875	2.40321	2.48891	2.56401	2.54918	1.09867	0.765656	2.4902
ATP1A1	Sodium/potassium-transporting ATPase subunit alpha-1	0.240743	0.0482931	1.03404	P05023-4;P05023;P05023-3;P05023-2;P13637;P13637-2;P13637-3;P50993;Q13733;P20648	P05023-4;P05023;P05023-3;P05023-2	26	62	32.9				28	28	32.9	30.8	113	0	323.31	6563200000	4.09914	4.27169	3.94108	4.05469	4.07035	4.13064	3.92282	4.04961	3.65329	3.06778	3.4786
PDXDC1	Pyridoxal-dependent decarboxylase domain-containing protein 1	0.145393	0.0480614	1.03387	Q6P996-3;Q6P996-4;Q6P996-5;Q6P996;Q6P996-2	Q6P996-3;Q6P996-4;Q6P996-5;Q6P996	5	5	8.3				5	5	8.3	8.3	76.546	0	7.0705	97587000	-0.305599	-0.354324	-0.54541	-0.442612	-0.227797	-0.318398	-0.725996	-0.568001	-2.92148	-0.844308	-1.61858
ABCE1	ATP-binding cassette sub-family E member 1	0.132874	0.0478587	1.03373	P61221	P61221	2	2	4.8				2	2	4.8	4.8	67.314	0	2.457	53139000	-3.13474	-2.7127	-2.97107	-2.66364	-3.09635	-2.977	-2.72826	-2.87197	-4.08639	NaN	-2.19998
ACTR2	Actin-related protein 2	0.361384	0.0470648	1.03316	P61160;P61160-2	P61160;P61160-2	2	2	8.4				2	2	8.4	8.4	44.76	0	5.7376	169810000	-1.43161	-1.4614	-1.59194	-1.57419	-1.55676	-1.56709	-1.46502	-1.65852	-0.398621	-1.89808	-0.943952
UBA5	Ubiquitin-like modifier-activating enzyme 5	0.650641	0.0466275	1.03285	Q9GZZ9-2;Q9GZZ9	Q9GZZ9-2;Q9GZZ9	2	2	7.2				2	2	7.2	7.2	38.537	0	3.4922	202610000	-1.72991	-1.70899	-1.76395	-1.77798	-1.76306	-1.74336	-1.78029	-1.88062	-6.22104	-1.62497	-1.199
SLC16A1	Monocarboxylate transporter 1	0.187489	0.0465183	1.03277	P53985;P53985-2	P53985	3	8	11.2				3	3	11.2	11.2	53.944	0	11.778	2837400000	2.5035	2.5255	2.43638	2.21347	2.38253	2.5078	2.19181	2.41064	2.12345	1.38747	1.21124
IRS4	Insulin receptor substrate 4	0.122878	0.0457973	1.03225	O14654	O14654	9	15	9.2				9	9	9.2	9.2	133.77	0	29.108	395010000	0.305058	0.742743	0.241783	0.163033	0.349463	0.434875	0.194054	0.291035	-0.642885	0.233926	-0.336471
OCIAD1	OCIA domain-containing protein 1	0.196697	0.0456576	1.03215	Q9NX40;Q9NX40-3;Q9NX40-2;Q9NX40-4	Q9NX40;Q9NX40-3;Q9NX40-2;Q9NX40-4	4	5	23.7				4	4	23.7	23.7	27.626	0	3.2661	210900000	-0.531799	-0.387259	-0.58252	-0.636204	-0.45747	-0.454365	-0.752106	-0.656471	-0.180756	-0.895132	-1.11779
PPIA	Peptidyl-prolyl cis-trans isomerase A;Peptidyl-prolyl cis-trans isomerase A, N-terminally processed	0.0576163	0.0454459	1.032	P62937;P62937-2;Q9Y536;F5H284;A2BFH1	P62937	8	16	55.8				9	9	55.8	55.2	18.012	0	25.789	4433000000	2.72846	2.84401	3.53404	3.10459	2.68972	2.65337	3.56263	3.1236	2.41843	0.228686	4.40479
SNRNP200	U5 small nuclear ribonucleoprotein 200 kDa helicase	0.400915	0.0452137	1.03184	O75643;O75643-2	O75643	3	5	2.1				3	3	2.1	2.1	244.5	0	20.46	147930000	-0.30987	-0.438515	-0.531866	-0.419329	-0.515932	-0.440332	-0.489777	-0.434393	-2.52221	NaN	0.580594
FARSB	Phenylalanine--tRNA ligase beta subunit	0.246774	0.0448799	1.0316	Q9NSD9-2;Q9NSD9	Q9NSD9-2;Q9NSD9	4	4	8				4	4	8	8	54.86	0	3.7084	123040000	-1.53481	-1.30319	-1.54625	-1.6028	-1.54944	-1.4511	-1.55599	-1.61004	-5.25375	-1.31134	-1.50844
PRRC2C	Protein PRRC2C	0.205967	0.0448194	1.03155	Q9Y520-2;Q9Y520-3;Q9Y520-6;Q9Y520-4;Q9Y520-5;Q9Y520;Q9Y520-7	Q9Y520-2;Q9Y520-3;Q9Y520-6;Q9Y520-4;Q9Y520-5;Q9Y520;Q9Y520-7	2	3	1				2	2	1	1	291.09	0	1.9135	83724000	-2.04829	-1.9331	-2.14615	-1.99637	-2.00883	-1.89971	-2.20518	-2.18946	-0.862532	NaN	-1.44408
SEC16A	Protein transport protein Sec16A	0.176164	0.0446529	1.03144	O15027-2;O15027-4;O15027-3;O15027;O15027-5	O15027-2;O15027-4;O15027-3;O15027;O15027-5	5	5	2.9				5	5	2.9	2.9	228.87	0	8.5832	117630000	-0.952587	-0.972435	-0.94739	-0.680349	-0.761513	-0.904766	-1.09847	-0.966625	-1.98217	-0.419427	-1.09173
GFPT1;GFPT2	Glutamine--fructose-6-phosphate aminotransferase [isomerizing] 1;Glutamine--fructose-6-phosphate aminotransferase [isomerizing] 2	0.105623	0.044045	1.031	Q06210-2;Q06210;O94808	Q06210-2;Q06210;O94808	2	2	4.8				2	2	4.8	4.8	76.758	0	7.9134	66887000	-2.58442	-2.14079	-2.72564	-2.67397	-2.59092	-2.35437	-2.67431	-2.6814	NaN	-3.14901	-2.29578
SLC27A4	Long-chain fatty acid transport protein 4	0.150113	0.0439587	1.03094	Q6P1M0-2;Q6P1M0	Q6P1M0-2;Q6P1M0	3	4	19				3	3	19	19	26	0	13.806	174770000	-0.752211	-0.466471	-0.875528	-0.887772	-0.756327	-0.662277	-0.918653	-0.820559	NaN	NaN	-1.49102
HSPA6;HSPA7	Heat shock 70 kDa protein 6;Putative heat shock 70 kDa protein 7	0.181618	0.0438743	1.03088	P17066;P48741	P17066;P48741	2	9	17.4				14	2	3.7	3.7	71.027	0	31.466	5366900000	1.47252	1.75358	1.41897	1.5816	1.66236	1.54641	1.39825	1.44415	-0.101831	0.212498	0.474729
EEF2	Elongation factor 2	0.270916	0.0437717	1.03081	P13639	P13639	34	70	52.9				35	35	52.9	51.7	95.337	0	230.87	8682800000	4.54674	4.72665	4.67687	4.58308	4.47605	4.55042	4.7236	4.60819	5.05894	5.48977	5.50903
AP2S1	AP-2 complex subunit sigma	0.275503	0.0426302	1.02999	P53680-2;P53680	P53680-2;P53680	2	3	15.4				2	2	15.4	15.4	12.417	0	2.3798	222510000	-0.833824	-1.03372	-0.975559	-0.919231	-0.954952	-0.865536	-1.08893	-1.02344	-0.51011	-7.97023	-0.509473
PLEC	Plectin	0.296711	0.0423856	1.02982	Q15149-7;Q15149-8;Q15149-9;Q15149-5;Q15149-4;Q15149-6;Q15149-3;Q15149-2;Q15149	Q15149-7;Q15149-8;Q15149-9;Q15149-5;Q15149-4;Q15149-6;Q15149-3;Q15149-2;Q15149	8	7	2.2				8	8	2.2	2.2	512.6	0	7.7283	196590000	-0.158138	-0.283516	-0.0200996	-0.135195	-0.18548	-0.142332	-0.263578	-0.1751	0.311988	1.40198	0.367122
STRN	Striatin	0.246115	0.0417042	1.02933	O43815-2;O43815	O43815-2;O43815	4	4	7.8				4	4	7.8	7.8	80.76	0	23.605	101260000	-0.76721	-0.657127	-0.787804	-0.832777	-0.807165	-0.637583	-0.883444	-0.883543	-1.89648	0.237061	-1.04247
TRAPPC3	Trafficking protein particle complex subunit 3	0.200062	0.0415168	1.0292	O43617-2;O43617	O43617-2;O43617	3	4	25.4				3	3	25.4	25.4	15.005	0	4.6869	411290000	-0.318739	-0.231314	-0.533762	-0.386906	-0.501093	-0.37822	-0.480133	-0.277342	NaN	NaN	-1.1082
2005-03-01	E3 ubiquitin-protein ligase MARCH5	0.0931663	0.0414243	1.02913	Q9NX47	Q9NX47	2	3	8.3				2	2	8.3	8.3	31.231	0.00076628	1.73	256450000	0.814323	1.08983	0.601984	0.762571	0.868086	1.07129	0.479599	0.68404	-0.67214	NaN	-1.50071
EIF1AX;EIF1AY	Eukaryotic translation initiation factor 1A, X-chromosomal;Eukaryotic translation initiation factor 1A, Y-chromosomal	0.0311561	0.0413227	1.02906	P47813;O14602	P47813;O14602	2	5	31.9				2	2	31.9	31.9	16.46	0	12.916	83540000	-2.79978	-2.71679	-1.33184	-2.09794	-3.0231	-2.18594	-1.54223	-2.36037	-1.5861	-2.47363	-0.301099
RFC3	Replication factor C subunit 3	0.122832	0.041131	1.02892	P40938-2;P40938	P40938-2;P40938	5	7	22.6				5	5	22.6	22.6	34.756	0	12.828	276670000	0.534748	0.890707	0.363768	0.371302	0.516079	0.514116	0.435631	0.530174	0.2097	-0.676951	0.0691481
ARHGDIA	Rho GDP-dissociation inhibitor 1	0.118243	0.0406842	1.0286	P52565;P52565-2	P52565;P52565-2	3	4	18.6				3	3	18.6	18.6	23.207	0	4.3126	47596000	-2.89523	-2.8801	-2.46979	-2.75186	-2.9072	-2.93225	-2.57998	-2.74028	-4.2449	-2.95169	-1.81665
SMARCB1	SWI/SNF-related matrix-associated actin-dependent regulator of chromatin subfamily B member 1	0.209152	0.0398421	1.028	Q12824-2;Q12824	Q12824-2;Q12824	2	2	7.7				2	2	7.7	7.7	43.158	0	13.183	75471000	-2.66837	-2.61877	-2.70275	-2.75832	-2.74554	-2.55283	-2.89351	-2.7157	-2.65103	NaN	-2.10639
NUBP2	Cytosolic Fe-S cluster assembly factor NUBP2	0.199988	0.038897	1.02733	Q9Y5Y2	Q9Y5Y2	2	2	13.3				2	2	13.3	13.3	28.825	0	3.4754	86134000	-3.3054	-3.06116	-3.29813	-3.12669	-3.26696	-3.17399	-3.35349	-3.15253	NaN	NaN	-3.37193
CTPS1	CTP synthase 1	0.128818	0.0379963	1.02669	P17812;P17812-2	P17812;P17812-2	8	8	16.1				8	8	16.1	16.1	66.69	0	15.48	1255600000	1.82423	2.12286	1.72301	1.63703	1.74018	1.88534	1.76141	1.76822	1.17342	0.985093	1.85023
YBX1;YBX3;YBX2	Nuclease-sensitive element-binding protein 1;Y-box-binding protein 3;Y-box-binding protein 2	0.20169	0.0376291	1.02643	P67809;P16989-2;P16989-3;Q9Y2T7;P16989	P67809;P16989-2;P16989-3;Q9Y2T7;P16989	3	5	13.6				3	3	13.6	13.6	35.924	0	9.4362	418150000	-0.508619	-0.23601	-0.367554	-0.540522	-0.401426	-0.425549	-0.507669	-0.468576	0.400906	-1.68757	0.336349
NUP160	Nuclear pore complex protein Nup160	0.090455	0.0372496	1.02616	Q12769;Q12769-2	Q12769;Q12769-2	2	2	1.7				2	2	1.7	1.7	162.12	0	3.0996	69132000	-3.03279	-3.11694	-3.04948	-2.52682	-2.926	-2.81182	-3.08786	-3.04934	NaN	NaN	-3.17338
DNAJB11	DnaJ homolog subfamily B member 11	0.297253	0.0366931	1.02576	Q9UBS4	Q9UBS4	4	7	12.8				4	4	12.8	12.8	40.513	0	34.381	569730000	0.479342	0.467867	0.336721	0.432543	0.412832	0.448046	0.27354	0.435282	1.88755	2.67933	1.44311
RAD50	DNA repair protein RAD50	0.120512	0.0365512	1.02566	Q92878-3;Q92878;Q92878-2	Q92878-3;Q92878;Q92878-2	2	1	2.7				2	2	2.7	2.7	138.43	0	2.1509	4643200	-5.69947	-5.94352	-5.9201	-5.56805	-5.94837	-5.86399	-5.62705	-5.83794	NaN	NaN	-5.38222
ACTR3	Actin-related protein 3	0.441599	0.0362129	1.02542	P61158	P61158	3	3	8.9				3	3	8.9	8.9	47.371	0	3.9356	62216000	-1.70691	-1.71483	-1.56684	-1.62404	-1.66893	-1.67656	-1.70229	-1.7097	-0.480764	-0.652252	-1.05917
NRAS;HRAS;KRAS	GTPase NRas;GTPase HRas;GTPase HRas, N-terminally processed;GTPase KRas;GTPase KRas, N-terminally processed	0.163138	0.035996	1.02526	P01111;P01112-2;P01116-2;P01116;P01112	P01111;P01112-2;P01116-2;P01116;P01112	2	2	10.6				2	2	10.6	10.6	21.229	0	7.2759	145030000	-0.303467	-0.0203094	-0.265688	-0.238966	-0.243435	-0.087862	-0.352676	-0.288441	-0.337901	NaN	-0.720155
COPS8	COP9 signalosome complex subunit 8	0.136654	0.0356641	1.02503	Q99627-2;Q99627	Q99627-2;Q99627	2	4	15.6				2	2	15.6	15.6	17.909	0	2.3252	72596000	-0.88953	-0.919954	-1.05911	-1.06955	-1.14556	-1.18286	-0.816648	-0.935732	-1.00713	NaN	-0.118094
DDX17	Probable ATP-dependent RNA helicase DDX17	0.243977	0.0355973	1.02498	Q92841-1;Q92841-3;Q92841;Q92841-2	Q92841-1;Q92841-3;Q92841;Q92841-2	16	24	39.2				26	16	26.3	26.3	72.371	0	123.3	4413300000	3.8683	4.04509	3.86109	3.82713	3.7692	3.9214	3.87441	3.89421	4.00367	1.94085	4.40165
ALDH3A2	Fatty aldehyde dehydrogenase	0.105779	0.0355825	1.02497	P51648;P51648-2	P51648;P51648-2	2	2	5.2				2	2	5.2	5.2	54.847	0	1.9066	55754000	-1.43225	-1.31063	-0.999445	-1.28032	-1.36759	-1.43968	-1.05439	-1.30331	-0.364398	-0.618621	-0.45235
EIF3C;EIF3CL	Eukaryotic translation initiation factor 3 subunit C;Eukaryotic translation initiation factor 3 subunit C-like protein	0.184166	0.0354581	1.02488	Q99613-2;Q99613;B5ME19	Q99613-2;Q99613;B5ME19	9	9	9.7				9	9	9.7	9.7	104.1	0	14.625	515190000	0.593222	0.812929	0.462147	0.569801	0.567308	0.615974	0.575191	0.537792	1.2919	1.81679	1.17123
SF3A1	Splicing factor 3A subunit 1	0.164864	0.0353451	1.0248	Q15459-2;Q15459	Q15459-2;Q15459	2	3	4.8				2	2	4.8	4.8	81.677	0	5.4221	29205000	-2.76215	-2.58122	-2.91441	-2.88666	-2.8354	-2.83516	-2.88588	-2.72937	-1.43026	-1.05568	-2.43818
DNAAF5	Dynein assembly factor 5, axonemal	0.201492	0.0353436	1.0248	Q86Y56;Q86Y56-2;Q86Y56-3	Q86Y56;Q86Y56-2	14	21	22				14	14	22	22	93.52	0	76.033	1726300000	2.01049	2.11384	1.8631	2.0158	1.92646	2.07704	1.86153	1.99683	0.908411	0.440508	0.930354
TUFM	Elongation factor Tu, mitochondrial	0.260387	0.0353403	1.0248	P49411	P49411	12	19	40.9				12	12	40.9	40.9	49.541	0	32.974	1810700000	2.84472	2.8949	2.74836	2.71025	2.65914	2.77694	2.80809	2.8127	4.43551	6.81895	3.1274
GTF3C3	General transcription factor 3C polypeptide 3	0.205406	0.0351396	1.02466	Q9Y5Q9;Q9Y5Q9-2	Q9Y5Q9;Q9Y5Q9-2	2	3	2.9				2	2	2.9	2.9	101.27	0	11.242	49262000	-2.35748	-2.19901	-2.43868	-2.36661	-2.40174	-2.24596	-2.45735	-2.39729	-4.67202	NaN	-2.92901
RPL10A	60S ribosomal protein L10a	0.476946	0.034862	1.02446	P62906	P62906	8	23	34.1				8	8	34.1	34.1	24.831	0	84.619	3895900000	4.23559	4.21891	4.13561	4.13787	4.17786	4.17786	4.09319	4.13962	3.91561	3.87897	4.7966
SMC3	Structural maintenance of chromosomes protein 3	0.370943	0.0347862	1.02441	Q9UQE7	Q9UQE7	10	12	10.1				10	10	10.1	10.1	141.54	0	23.094	355130000	0.688845	0.705645	0.594725	0.618786	0.61021	0.702787	0.557775	0.598082	0.931087	0.534379	0.674266
ADCK3	Atypical kinase ADCK3, mitochondrial	0.145931	0.0345063	1.02421	Q8NI60;Q8NI60-4;Q8NI60-3;Q8NI60-2	Q8NI60;Q8NI60-4;Q8NI60-3	3	4	6.3				4	4	6.3	4.5	71.949	0	7.1795	176630000	-0.467319	-0.553261	-0.436758	-0.177284	-0.339497	-0.450825	-0.530485	-0.451841	-0.932354	NaN	-1.10936
EIF4A1;EIF4A2	Eukaryotic initiation factor 4A-I;Eukaryotic initiation factor 4A-II;Eukaryotic initiation factor 4A-II, N-terminally processed	0.238928	0.0343952	1.02413	P60842;P60842-2;Q14240;Q14240-2;P38919	P60842;P60842-2;Q14240;Q14240-2	7	11	21.2				7	7	21.2	21.2	46.153	0	27.578	1288800000	2.00204	2.14092	2.23728	2.08096	2.0333	2.04579	2.16891	2.07561	-1.19128	0	2.82012
GNAI3	Guanine nucleotide-binding protein G(k) subunit alpha	0.130889	0.0337877	1.0237	P08754;P11488;P63092-3;Q5JWF2-2;P38405-2;P63092-4;P63092;P38405;P63092-2;P04899-4;P04899;P19087;P09471;A8MTJ3;P63096;P09471-2;Q5JWF2	P08754	4	3	15.3				4	4	15.3	15.3	40.532	0	4.1671	388590000	1.17967	1.4583	1.14015	1.08237	1.06335	1.3062	1.18077	1.17502	-1.75373	-1.50002	0.0333586
EXOC6	Exocyst complex component 6	0.0865586	0.0332794	1.02334	Q8TAG9;Q8TAG9-2	Q8TAG9;Q8TAG9-2	2	2	4.4				2	2	4.4	4.4	93.721	0	5.9695	35595000	-2.92708	-2.43267	-3.01941	-2.74969	-2.76036	-2.73889	-2.9686	-2.79411	-2.04807	NaN	-3.17223
PHGDH	D-3-phosphoglycerate dehydrogenase	0.120732	0.0328331	1.02302	O43175	O43175	18	46	39				18	18	39	39	56.65	0	219.94	5119000000	3.5718	3.89468	3.4407	3.54742	3.6319	3.60299	3.50675	3.58162	2.97	0.694213	3.70261
SNRNP70	U1 small nuclear ribonucleoprotein 70 kDa	0.313896	0.0322652	1.02262	P08621-3;P08621-2;P08621	P08621-3;P08621-2;P08621	3	3	22.3				3	3	22.3	22.3	19.79	0	4.6599	46119000	-2.23789	-2.08411	-2.11352	-2.22349	-2.1904	-2.24562	-2.14957	-2.20248	-0.624537	-1.29535	-1.65627
HNRNPU	Heterogeneous nuclear ribonucleoprotein U	0.110175	0.0317492	1.02225	Q00839-2;Q00839	Q00839-2;Q00839	11	23	15.6				11	11	15.6	15.6	88.979	0	54.146	1689700000	2.94343	2.95161	2.90085	2.65513	2.64597	2.74864	2.98351	2.94589	5.35657	6.74531	3.64175
SLC25A10	Mitochondrial dicarboxylate carrier	0.129126	0.03123	1.02188	Q9UBX3;Q9UBX3-2	Q9UBX3;Q9UBX3-2	3	3	15.7				3	3	15.7	15.7	31.282	0	14.825	247540000	-0.658079	-0.444206	-0.764839	-0.764521	-0.648975	-0.600397	-0.833641	-0.673552	-1.50732	1.48801	-0.979104
EIF3F	Eukaryotic translation initiation factor 3 subunit F	0.219048	0.0303845	1.02128	O00303	O00303	2	3	10.1				2	2	10.1	10.1	37.563	0	5.0536	104500000	-1.77605	-1.73272	-1.92453	-1.69221	-1.81577	-1.75022	-1.85895	-1.82211	-0.999695	-2.04885	-1.79297
PCMT1	Protein-L-isoaspartate(D-aspartate) O-methyltransferase	0.188417	0.0293937	1.02058	P22061;P22061-2	P22061;P22061-2	8	11	56.4				8	8	56.4	56.4	24.636	0	120.23	5384700000	3.08687	3.12352	2.9545	3.03879	3.03205	3.14113	2.90146	3.01147	2.76854	2.34218	3.81949
TMEM126A	Transmembrane protein 126A	0.0260647	0.0291662	1.02042	Q9H061	Q9H061	2	2	17.4				2	2	17.4	17.4	21.527	0	2.8812	52660000	-1.72262	-2.76716	-1.68732	-0.986866	-1.65338	-1.73279	-2.14229	-1.75216	-1.47202	-2.0926	-3.24371
SMARCD2	SWI/SNF-related matrix-associated actin-dependent regulator of chromatin subfamily D member 2	0.140593	0.029036	1.02033	Q92925-3;Q92925-2;Q92925	Q92925-3;Q92925-2;Q92925	2	2	4.6				2	2	4.6	4.6	55.238	0.0034819	1.3402	71078000	-1.78282	-1.7995	-2.03352	-2.03874	-1.95927	-1.85349	-2.01442	-1.94354	-1.11737	NaN	-1.02338
ARPC4	Actin-related protein 2/3 complex subunit 4	0.0643127	0.0285735	1.02	P59998;P59998-3;P59998-4;P59998-2	P59998;P59998-3;P59998-4;P59998-2	2	3	10.1				2	2	10.1	10.1	19.667	0.00076746	1.74	90633000	-1.90186	-2.44831	-1.71615	-1.92938	-2.07092	-2.0275	-1.99595	-2.01562	-1.2155	NaN	-1.09562
MRPS9	28S ribosomal protein S9, mitochondrial	0.162382	0.0285244	1.01997	P82933	P82933	3	3	8.6				3	3	8.6	8.6	45.834	0	3.9519	68590000	-1.87682	-2.13877	-1.88561	-1.85188	-1.98593	-1.96829	-1.96523	-1.94773	-1.09287	NaN	-1.21332
RPN2	Dolichyl-diphosphooligosaccharide--protein glycosyltransferase subunit 2	0.0380776	0.0274353	1.0192	P04844-2;P04844	P04844-2;P04844	7	12	20.5				7	7	20.5	20.5	67.723	0	46.509	1473400000	1.71129	2.68968	1.64948	1.81876	2.03619	2.02958	1.81161	1.88209	1.70698	3.43695	1.51412
NCDN	Neurochondrin	0.127449	0.0268559	1.01879	Q9UBB6-2;Q9UBB6;Q9UBB6-3	Q9UBB6-2;Q9UBB6;Q9UBB6-3	3	5	8.3				3	3	8.3	8.3	77.242	0	3.1576	121900000	-0.670294	-0.5693	-0.853411	-0.723925	-0.759508	-0.577635	-0.81411	-0.7731	-0.691462	-1.00057	-1.05818
HNRNPH3	Heterogeneous nuclear ribonucleoprotein H3	0.0920157	0.0266705	1.01866	P31942-2;P31942;P31942-3;P31942-4;P31942-6;P31942-5	P31942-2;P31942;P31942-3;P31942-4	9	32	39.3				9	9	39.3	39.3	35.238	0	147.26	3669800000	2.87058	3.04723	2.75031	2.73996	2.67025	2.99009	2.71742	2.92365	2.82345	0.61191	3.9179
GANAB	Neutral alpha-glucosidase AB	0.200248	0.0262184	1.01834	Q14697;Q14697-2	Q14697;Q14697-2	5	8	6.2				5	5	6.2	6.2	106.87	0	30.002	421850000	0.573799	0.785118	0.663679	0.587885	0.588812	0.609678	0.674879	0.632238	0.669114	0.899537	1.77376
MTFP1	Mitochondrial fission process protein 1	0.105637	0.0256829	1.01796	Q9UDX5;Q9UDX5-2	Q9UDX5;Q9UDX5-2	2	3	14.5				2	2	14.5	14.5	18.01	0	3.1189	98669000	-2.15079	-2.0245	-2.27662	-2.2437	-2.17337	-2.2138	-2.37463	-2.03655	-2.48856	NaN	-2.71687
RUVBL1	RuvB-like 1	0.0675131	0.0239868	1.01677	Q9Y265;Q9Y265-2	Q9Y265;Q9Y265-2	8	16	22.4				8	8	22.4	22.4	50.227	0	29.719	633720000	1.61005	2.08209	1.57855	1.54712	1.69624	1.67714	1.67669	1.6718	1.85715	-0.285987	2.03537
EXOC5	Exocyst complex component 5	0.100861	0.0239673	1.01675	O00471	O00471	2	2	4.8				2	2	4.8	4.8	81.852	0	9.1378	118440000	-2.78865	-2.75548	-3.00409	-2.78531	-2.83671	-2.69426	-2.8863	-3.01214	-2.97785	-1.43801	-3.29669
TMPO	Lamina-associated polypeptide 2, isoform alpha;Thymopoietin;Thymopentin;Lamina-associated polypeptide 2, isoforms beta/gamma;Thymopoietin;Thymopentin	0.13488	0.0236011	1.01649	P42166;P42167-3	P42166;P42167-3	5	9	28				13	5	11.2	11.2	75.491	0	19.247	181970000	-0.911758	-0.76482	-0.963615	-0.722523	-0.805756	-0.811323	-0.918829	-0.921213	-0.384708	-0.856087	-0.952476
ASNS	Asparagine synthetase [glutamine-hydrolyzing]	0.210712	0.0233293	1.0163	P08243-3;P08243-2;P08243	P08243-3;P08243-2;P08243	2	3	4.8				2	2	4.8	4.8	54.817	0.0035039	1.357	161000000	-2.09763	-2.07109	-1.97028	-2.09216	-2.13442	-2.00186	-2.05381	-2.13438	-3.23546	-2.1236	-1.12291
SPG20	Spartin	0.0687536	0.0232739	1.01626	Q8N0X7	Q8N0X7	2	2	3.3				2	2	3.3	3.3	72.832	0.0028249	1.4127	1725300000	0.205215	0	0.224371	0.368542	0.396748	0.268646	0.0182514	0.0213871	-8.31148	-1.1074	-2.33567
RIF1	Telomere-associated protein RIF1	0.154924	0.0232491	1.01625	Q5UIP0-2;Q5UIP0	Q5UIP0-2;Q5UIP0	10	12	5.5				10	10	5.5	5.5	271.69	0	14.467	907010000	1.60883	1.76175	1.59981	1.60521	1.67929	1.67267	1.49884	1.63179	2.24213	1.59246	1.59214
CDC42	Cell division control protein 42 homolog	0.1901	0.0230808	1.01613	P60953;P60953-1;Q9H4E5-2;P17081;Q9H4E5	P60953;P60953-1	6	15	44				7	7	44	38.2	21.258	0	14.754	1662300000	2.82269	2.80735	2.78539	2.63065	2.71541	2.70913	2.78679	2.74242	2.04303	1.73896	3.02258
BOLA2	BolA-like protein 2	0.136767	0.0228481	1.01596	Q9H3K6;Q9H3K6-2	Q9H3K6;Q9H3K6-2	5	15	65.1				5	5	65.1	65.1	10.116	0	25.155	2800500000	2.06525	2.06376	2.18558	2.23949	2.17065	2.21226	2.02213	2.05765	2.47023	0.52662	3.30796
RPS5	40S ribosomal protein S5;40S ribosomal protein S5, N-terminally processed	0.0731763	0.0228219	1.01594	P46782	P46782	14	42	53.9				14	14	53.9	53.9	22.876	0	279.49	15285000000	5.15794	5.30378	4.89065	4.90027	4.93422	5.1224	4.98752	5.11721	4.64652	2.47147	4.73056
RRP12	RRP12-like protein	0.0856775	0.0218511	1.01526	Q5JTH9-2;Q5JTH9-3;Q5JTH9	Q5JTH9-2;Q5JTH9-3;Q5JTH9	3	3	3.7				3	3	3.7	3.7	132.71	0	3.776	70958000	-2.02273	-2.18402	-2.10047	-1.8299	-2.05336	-1.94095	-2.19743	-2.03279	-2.75251	NaN	-1.768
ATP5I	ATP synthase subunit e, mitochondrial	0.108048	0.0217304	1.01518	P56385	P56385	2	4	18.8				2	2	18.8	18.8	7.9331	0	18.049	117140000	-1.11377	-1.17579	-1.21724	-1.26391	-1.0581	-1.30657	-1.14888	-1.34408	-1.33174	-2.22897	0.0671854
PCBP1	Poly(rC)-binding protein 1	0.425498	0.0214024	1.01495	Q15365;P57723-2;P57723	Q15365	5	22	34.6				10	10	34.6	16.6	37.497	0	21.456	3581300000	2.80247	2.75321	2.75942	2.70973	2.69935	2.74741	2.74511	2.74734	3.17137	-0.24218	3.00142
TRMT112	Multifunctional methyltransferase subunit TRM112-like protein	0.157216	0.0213928	1.01494	Q9UI30;Q9UI30-2	Q9UI30;Q9UI30-2	3	3	27.2				3	3	27.2	27.2	14.199	0	12.293	103350000	-2.0354	-1.95377	-2.05291	-2.03864	-2.17207	-2.04461	-1.99378	-1.95585	-2.86015	-3.95771	-1.52716
PLS3	Plastin-3	0.0677413	0.0213051	1.01488	P13797-3;P13797-2;P13797;P13796	P13797-3;P13797-2;P13797	4	5	8				4	4	8	8	65.632	0	39.791	458320000	0.975609	0.613897	0.933939	0.835085	0.633238	0.808275	1.01369	0.818104	0.876369	NaN	1.10114
IPO5	Importin-5	0.126774	0.0207605	1.01449	O00410;O00410-3;O00410-2	O00410;O00410-3;O00410-2	14	24	21.4				15	15	21.4	19.1	123.63	0	56.979	1982000000	3.09719	3.1034	2.90489	3.14375	3.04044	3.0886	2.95665	3.08049	2.77008	0.725135	2.86476
MATR3	Matrin-3	0.183347	0.0203161	1.01418	P43243;P43243-2	P43243	8	13	10.5				8	8	10.5	10.5	94.622	0	9.8109	856160000	1.84561	1.68972	1.67305	1.79274	1.75575	1.73046	1.69466	1.73898	1.49454	-1.31243	1.9461
COPZ1	Coatomer subunit zeta-1	0.124156	0.0202761	1.01415	P61923-5;P61923;P61923-4	P61923-5;P61923;P61923-4	2	3	16.9				3	3	16.9	8.1	18.374	0	7.346	73188000	-1.514	-1.48947	-1.67303	-1.72608	-1.58811	-1.60086	-1.67088	-1.62383	-1.07152	-1.60579	-1.11418
HNRNPH2	Heterogeneous nuclear ribonucleoprotein H2	0.0770944	0.0201912	1.01409	P55795	P55795	8	14	38.8				13	8	24.9	24.9	49.263	0	166.04	700550000	0.822315	1.02769	0.710852	0.705376	0.688299	0.950657	0.743725	0.80279	0.586315	0.0520821	0.406838
SF3B3	Splicing factor 3B subunit 3	0.137471	0.0200934	1.01403	Q15393;Q15393-3;Q15393-2	Q15393;Q15393-3	7	12	7				7	7	7	7	135.58	0	9.475	410730000	0.324709	0.54138	0.321676	0.325672	0.347691	0.383535	0.337538	0.3643	3.8832	5.37035	0.721128
FASN	Fatty acid synthase;[Acyl-carrier-protein] S-acetyltransferase;[Acyl-carrier-protein] S-malonyltransferase;3-oxoacyl-[acyl-carrier-protein] synthase;3-oxoacyl-[acyl-carrier-protein] reductase;3-hydroxyacyl-[acyl-carrier-protein] dehydratase;Enoyl-[acyl-carrier-protein] reductase;Oleoyl-[acyl-carrier-protein] hydrolase	0.113244	0.0182676	1.01274	P49327	P49327	26	41	13.9				26	26	13.9	13.9	273.42	0	93.027	1990900000	2.68198	2.79608	2.55537	2.58532	2.56406	2.65494	2.67962	2.64706	2.27288	1.69472	3.05461
PDHA1	Pyruvate dehydrogenase E1 component subunit alpha, somatic form, mitochondrial	0.0730594	0.0182629	1.01274	P08559-3;P08559;P08559-2;P08559-4;P29803	P08559-3;P08559;P08559-2;P08559-4	3	3	7.8				3	3	7.8	7.8	40.188	0	2.2514	144870000	-0.401943	-0.657436	-0.280918	-0.338272	-0.397596	-0.535948	-0.426779	-0.391298	0.844497	-0.21177	0.226411
HSPH1	Heat shock protein 105 kDa	0.164504	0.018013	1.01256	Q92598-2;Q92598-3;Q92598;Q92598-4	Q92598-2;Q92598-3;Q92598;Q92598-4	9	13	15.4				9	9	15.4	15.4	92.115	0	28.864	562310000	0.933163	0.9713	0.993204	0.918581	0.832294	0.937616	0.956305	1.01798	1.32899	0.894472	0.823726
ATAD3B	ATPase family AAA domain-containing protein 3B	0.0645651	0.0178714	1.01246	Q5T9A4;Q5T9A4-3	Q5T9A4;Q5T9A4-3	2	6	26.2				17	2	6.2	6.2	72.572	0	19.572	137640000	-0.540474	-0.443493	-0.521698	-0.255568	-0.396038	-0.352278	-0.676718	-0.407684	0.265985	-2.39165	-0.0953989
RAN	GTP-binding nuclear protein Ran	0.0950319	0.0178132	1.01242	P62826	P62826	5	8	28.7				6	6	28.7	23.6	24.423	0	13.415	900380000	2.1051	2.14827	2.2492	1.95024	2.05649	2.1057	2.17253	2.04683	0.629437	0.827656	2.54953
CCT3	T-complex protein 1 subunit gamma	0.0922487	0.0176668	1.01232	P49368;P49368-2	P49368;P49368-2	19	34	42.8				19	19	42.8	42.8	60.533	0	61.477	6192100000	3.93522	4.21302	3.9586	3.94009	3.94543	4.01154	3.98753	4.03176	4.45491	5.14097	4.57103
RPLP0;RPLP0P6	60S acidic ribosomal protein P0;60S acidic ribosomal protein P0-like	0.25093	0.0176516	1.01231	P05388;P05388-2;Q8NHW5	P05388;P05388-2;Q8NHW5	9	16	33.4				9	9	33.4	33.4	34.273	0	83.121	4524100000	3.81662	3.71752	3.73843	3.78252	3.79763	3.74532	3.7176	3.72393	2.00288	NaN	4.20112
TF	Serotransferrin	0.0756931	0.0175982	1.01227	P02787	P02787	6	8	8.9				6	6	8.9	8.9	77.063	0	21.664	348460000	0.344687	0.394098	0.23439	0.101238	0.274052	0.370613	0.116686	0.24267	0.998406	-0.117326	1.2656
DHX15	Pre-mRNA-splicing factor ATP-dependent RNA helicase DHX15	0.0587024	0.0173483	1.0121	O43143	O43143	7	10	11.4				7	7	11.4	11.4	90.932	0	13.493	538040000	1.32517	1.02377	1.16354	1.44174	1.32985	1.24179	1.0864	1.22679	2.25398	2.04842	1.52424
SRP68	Signal recognition particle subunit SRP68	0.0741327	0.0170841	1.01191	Q9UHB9-4;Q9UHB9;Q9UHB9-2;Q9UHB9-3	Q9UHB9-4;Q9UHB9;Q9UHB9-2	8	11	17				8	8	17	17	66.107	0	25.163	590040000	1.40218	1.13665	1.28259	1.16821	1.33129	1.32484	1.13085	1.13432	1.1539	2.58417	1.29158
YAE1D1	Yae1 domain-containing protein 1	0.0562093	0.0167451	1.01167	Q9NRH1;Q9NRH1-2	Q9NRH1;Q9NRH1-2	5	6	35.4				5	5	35.4	35.4	25.299	0	24.458	286080000	-0.470184	-0.601822	-0.545559	-0.393808	-0.328787	-0.409966	-0.754459	-0.585142	-2.38281	-5.26603	0.371289
RPL31	60S ribosomal protein L31	0.0300672	0.0166917	1.01164	P62899-3;P62899;P62899-2	P62899-3;P62899;P62899-2	2	2	14				2	2	14	14	13.995	0.00074516	1.6357	228800000	-1.33894	-1.06051	-0.751369	-1.28376	-0.783556	-1.30223	-1.03289	-1.38267	0.0436287	NaN	0.137507
XRN2	5-3 exoribonuclease 2	0.0752691	0.0164671	1.01148	Q9H0D6-2;Q9H0D6	Q9H0D6-2;Q9H0D6	2	2	2.9				2	2	2.9	2.9	99.96	0	2.9552	105400000	-2.43533	-2.12072	-2.32533	-2.46055	-2.33622	-2.38093	-2.32277	-2.36788	-1.46201	-3.34466	-1.28405
RBM25	RNA-binding protein 25	0.102856	0.0164523	1.01147	P49756;P49756-2;P49756-3	P49756;P49756-2;P49756-3	3	3	3.2				3	3	3.2	3.2	100.18	0	3.1909	61107000	-1.78009	-1.59859	-1.75552	-1.83145	-1.81797	-1.70766	-1.70218	-1.80363	-0.895843	-1.54534	-1.04593
RPLP2	60S acidic ribosomal protein P2	0.146476	0.016129	1.01124	P05387	P05387	5	13	76.5				5	5	76.5	76.5	11.665	0	19.113	1860700000	2.76488	2.72516	2.78875	2.88837	2.83808	2.75957	2.77861	2.72639	0.885468	0.598341	2.70169
CLTA	Clathrin light chain A	0.0826046	0.0161281	1.01124	P09496-2;P09496-5;P09496-4;P09496-3;P09496	P09496-2;P09496-5;P09496-4;P09496-3;P09496	5	9	25.7				5	5	25.7	25.7	23.662	0	22.145	943210000	1.58698	1.77122	1.51151	1.51961	1.50202	1.63163	1.53741	1.65374	6.07476	7.85062	1.66026
C19orf52	Uncharacterized protein C19orf52	0.0418769	0.0152211	1.01061	Q9BSF4	Q9BSF4	2	3	11.9				2	2	11.9	11.9	29.233	0	6.4562	180760000	-1.59672	-1.44724	-1.87211	-1.76373	-1.77735	-1.49792	-1.87235	-1.59307	-1.56645	NaN	-3.44479
KHDRBS2;KHDRBS1	KH domain-containing, RNA-binding, signal transduction-associated protein 2;KH domain-containing, RNA-binding, signal transduction-associated protein 1	0.0370323	0.0142832	1.00995	Q5VWX1;Q07666-3;Q07666-2;Q07666	Q5VWX1;Q07666-3;Q07666-2;Q07666	2	1	8				2	2	8	8	38.927	0	3.0445	0	-0.0508709	-0.135847	-0.0556507	-0.413961	-0.370998	-0.331909	0.0464287	-0.0569839	-2.83241	NaN	0.934585
LUC7L2	Putative RNA-binding protein Luc7-like 2	0.0255107	0.0136189	1.00948	Q96HJ9-2;Q9Y383-3;Q9Y383-2;Q9Y383;Q9NQ29-2;Q9NQ29-3;Q9NQ29	Q96HJ9-2;Q9Y383-3;Q9Y383-2;Q9Y383	5	5	13.3				5	5	13.3	13.3	54.223	0	10.582	189610000	-1.1134	-0.747019	-1.07061	-1.03979	-1.35145	-0.566998	-1.05952	-1.04731	-0.980279	-1.03321	-0.695609
PSMA1	Proteasome subunit alpha type-1	0.0397055	0.013257	1.00923	P25786;P25786-2	P25786;P25786-2	4	5	14.8				4	4	14.8	14.8	29.555	0	7.8741	253920000	-0.583784	-0.100035	-0.204235	-0.313641	-0.367109	-0.402527	-0.170729	-0.314358	-1.37783	-0.943153	0.516286
TARS2	Threonine--tRNA ligase, mitochondrial	0.0442281	0.0126143	1.00878	Q9BW92-2;Q9BW92	Q9BW92-2;Q9BW92	2	3	5.3				2	2	5.3	5.3	66.372	0	8.9164	23905000	-2.494	-2.39647	-2.67383	-2.6704	-2.44632	-2.44675	-2.68879	-2.70329	-5.00825	-1.93712	-3.834
EEF1A1P5;EEF1A1	Putative elongation factor 1-alpha-like 3;Elongation factor 1-alpha 1	0.0870751	0.0119481	1.00832	Q5VTE0;P68104;P68104-2;Q05639	Q5VTE0;P68104;P68104-2	20	55	39.8				20	20	39.8	39.8	50.184	0	48.73	28476000000	6.16111	6.16758	6.22729	6.05935	6.1452	6.08483	6.2411	6.09642	5.92959	3.73693	6.42876
NDUFA4	Cytochrome c oxidase subunit NDUFA4	0.0422117	0.0114741	1.00798	O00483	O00483	6	12	55.6				6	6	55.6	55.6	9.3697	0	14.494	2058300000	2.64733	2.49795	2.34011	2.43027	2.3628	2.56695	2.33571	2.6043	-0.156573	0.436575	0.103601
SUGT1	Suppressor of G2 allele of SKP1 homolog	0.103935	0.0113244	1.00788	Q9Y2Z0-2;Q9Y2Z0	Q9Y2Z0-2;Q9Y2Z0	5	6	16.8				5	5	16.8	16.8	37.804	0	6.7195	306590000	0.0957432	0.0841904	-0.0117416	-0.0691891	0.0309067	0.00505447	0.0177441	0	-0.477359	1.99945	0.268428
AIMP1	Aminoacyl tRNA synthase complex-interacting multifunctional protein 1;Endothelial monocyte-activating polypeptide 2	0.0541285	0.0109487	1.00762	Q12904;Q12904-2	Q12904;Q12904-2	5	9	26				5	5	26	26	34.352	0	32.347	370450000	0.458773	0.773981	0.630526	0.642086	0.702478	0.605488	0.573753	0.579851	0.850414	-0.700525	0.802276
KHSRP	Far upstream element-binding protein 2	0.0540076	0.0105405	1.00733	Q92945	Q92945	19	48	45				24	24	45	39.1	73.114	0	145.6	6806300000	4.25271	4.40281	4.19887	4.11037	4.14364	4.23228	4.28417	4.2625	3.83454	2.23009	4.80075
CNOT1	CCR4-NOT transcription complex subunit 1	0.0509173	0.0104423	1.00726	A5YKK6-2;A5YKK6;A5YKK6-3;A5YKK6-4	A5YKK6-2;A5YKK6;A5YKK6-3	7	9	3.7				7	7	3.7	3.7	266.38	0	9.2943	385770000	0.605711	0.538631	0.505436	0.733065	0.670336	0.665838	0.456001	0.548899	0.00991631	0.591826	0.316649
ATP6V1H	V-type proton ATPase subunit H	0.0421453	0.0103507	1.0072	Q9UI12-2;Q9UI12	Q9UI12-2;Q9UI12	4	6	12.9				4	4	12.9	12.9	54.151	0	45.185	94826000	-0.924257	-0.849831	-1.05115	-0.870792	-1.01638	-0.732679	-1.05943	-0.928946	4.72903	6.81507	-1.63418
MIOS	WD repeat-containing protein mio	0.0327138	0.00997257	1.00694	Q9NXC5-2;Q9NXC5	Q9NXC5-2;Q9NXC5	3	5	8.1				3	3	8.1	8.1	64.015	0	5.0216	84016000	-1.33997	-1.03211	-1.40031	-1.33313	-1.17439	-1.19604	-1.45426	-1.32072	NaN	NaN	-1.36075
DNM2	Dynamin-2	0.0307556	0.00975704	1.00679	P50570-3;P50570-2;P50570-5;P50570-4;P50570;Q9UQ16-5;Q05193-5;Q05193-3;Q9UQ16-2;Q9UQ16-3;Q05193-2;Q05193;Q9UQ16;Q9UQ16-4	P50570-3;P50570-2;P50570-5;P50570-4;P50570	5	7	6.9				5	5	6.9	6.9	97.553	0	13.732	352480000	0.569658	0.910976	0.486383	0.462729	0.525486	0.569786	0.611631	0.683815	1.02191	2.18673	0.877982
TLN1	Talin-1	0.014536	0.00922251	1.00641	Q9Y490	Q9Y490	3	5	1.7				3	3	1.7	1.7	269.76	0	12.079	46683000	-3.85273	-2.93929	-3.76409	-3.50222	-3.45871	-3.40739	-3.54533	-3.68378	-1.79648	NaN	-2.80997
ATP5C1	ATP synthase subunit gamma, mitochondrial	0.0327429	0.00903749	1.00628	P36542;P36542-2	P36542;P36542-2	7	10	28.2				7	7	28.2	28.2	32.996	0	11.504	2261000000	2.3956	2.6757	2.30188	2.36307	2.51382	2.47532	2.30052	2.41044	1.77831	3.89127	1.91183
RPL13	60S ribosomal protein L13	0.0522276	0.00831604	1.00578	P26373;P26373-2	P26373;P26373-2	13	36	46.9				13	13	46.9	46.9	24.261	0	31.124	14195000000	4.24396	4.26439	4.31346	4.30125	4.4262	4.17805	4.25076	4.23479	4.37444	3.40273	4.86672
EIF3B	Eukaryotic translation initiation factor 3 subunit B	0.0399001	0.00783873	1.00545	P55884;P55884-2	P55884;P55884-2	5	6	7.7				5	5	7.7	7.7	92.48	0	5.4329	257870000	-0.361698	-0.214729	-0.451778	-0.464245	-0.428234	-0.279203	-0.376534	-0.439835	-0.0993986	0.848301	0.225734
SMC2	Structural maintenance of chromosomes protein 2	0.0660121	0.00774813	1.00539	O95347;O95347-2	O95347;O95347-2	13	20	11.3				13	13	11.3	11.3	135.65	0	17.205	1035700000	2.00706	2.11124	2.10668	2.00441	2.09476	2.07951	1.96449	2.05963	3.27518	4.12151	1.8911
EIF2B4	Translation initiation factor eIF-2B subunit delta	0.0159096	0.00774574	1.00538	Q9UI10-3;Q9UI10;Q9UI10-2	Q9UI10-3;Q9UI10;Q9UI10-2	4	4	11.7				4	4	11.7	11.7	57.457	0	38.589	117170000	-1.72165	-1.60521	-1.94037	-1.55087	-1.5324	-1.45859	-2.08018	-1.7779	-3.37084	NaN	-2.4768
SND1	Staphylococcal nuclease domain-containing protein 1	0.0203956	0.00769377	1.00535	Q7KZF4	Q7KZF4	2	2	3.7				2	2	3.7	3.7	102	0	2.535	30900000	-3.38302	-3.68886	-3.26864	-3.09214	-3.39601	-3.29025	-3.36567	-3.4115	0.30388	2.38321	-2.21035
EMC2	ER membrane protein complex subunit 2	0.00974645	0.00728989	1.00507	Q15006	Q15006	5	8	22.9				5	5	22.9	22.9	34.833	0	23.058	219380000	-0.0214405	-0.737162	-0.294022	0.346664	0.0131683	-0.074995	-0.46933	-0.203962	-1.50831	-0.887981	-0.671651
AGO3	Protein argonaute-3	0.0296328	0.00699186	1.00486	Q9H9G7-2;Q9H9G7	Q9H9G7-2;Q9H9G7	2	7	10.2				5	3	5.9	4.2	71.21	0	8.3992	133610000	0.199717	0.278362	0.183277	0.162273	0.3773	0.25243	0.0140152	0.151917	-0.553132	-2.35749	1.0046
NUP62	Nuclear pore glycoprotein p62	0.034415	0.00698948	1.00486	P37198	P37198	2	3	3.4				2	2	3.4	3.4	53.254	0	2.1623	269880000	-0.543406	-0.312252	-0.607723	-0.500637	-0.491461	-0.465034	-0.583427	-0.452053	-0.138158	-0.326754	-0.360524
RPL3	60S ribosomal protein L3	0.0475923	0.00649691	1.00451	P39023;Q92901	P39023	14	35	31				14	14	31	31	46.108	0	24.689	4704200000	4.41576	4.51032	4.37196	4.31932	4.46457	4.40947	4.35347	4.36386	3.62216	3.39352	4.9077
AGPAT4	1-acyl-sn-glycerol-3-phosphate acyltransferase delta	0.0181965	0.00642347	1.00446	Q9NRZ5-2;Q9NRZ5	Q9NRZ5-2;Q9NRZ5	3	4	19.4				3	3	19.4	19.4	24.951	0	4.6185	75974000	-2.08021	-1.85577	-2.34121	-2.21913	-2.04559	-2.08415	-2.30577	-2.08651	-5.79052	0.226935	-3.93571
RPL28	60S ribosomal protein L28	0.0440347	0.00623035	1.00433	P46779;P46779-2;P46779-3;P46779-4;P46779-5	P46779;P46779-2;P46779-3;P46779-4;P46779-5	6	15	35.8				6	6	35.8	35.8	15.747	0	13.852	6498800000	3.76758	3.62523	3.77339	3.58116	3.67489	3.67507	3.69236	3.68013	3.61652	1.34361	4.57077
DDX39B	Spliceosome RNA helicase DDX39B	0.00971795	0.00513363	1.00356	Q13838;Q13838-2	Q13838;Q13838-2	2	5	12.9				4	4	12.9	7.2	48.991	0	8.4256	329350000	0.0623093	-0.288385	0.471556	0.202837	0	-0.0026989	0.339931	0.0905495	0.715484	1.46878	0.440366
HLA-A	HLA class I histocompatibility antigen, A-11 alpha chain;HLA class I histocompatibility antigen, A-3 alpha chain;HLA class I histocompatibility antigen, A-36 alpha chain;HLA class I histocompatibility antigen, A-1 alpha chain;HLA class I histocompatibility antigen, A-30 alpha chain;HLA class I histocompatibility antigen, A-24 alpha chain;HLA class I histocompatibility antigen, A-69 alpha chain;HL…	0.0438707	0.00479555	1.00333	P13746;P04439;P13746-2;P30455;P30443;P16188;P05534;P10316;P01891;P30512;P30457;P30453;P30459;P30447;P10314;Q07000;P30484;P30495;P30464;P16189;P18462;Q29940;P30504;Q09160;P10319;P30456;P30450;P01892;P30492;P30491;P18465;P30685;P30493;P16190;P03989;P30481;P30483;P30485;P30487;P30488;Q04826;P30501;P30498;P30490;P18464;P30461;P30511-2;P30511;Q31612;P30479;P30466;P30511-3	P13746;P04439;P13746-2;P30455;P30443;P16188;P05534;P10316;P01891;P30512;P30457;P30453;P30459;P30447;P10314	3	12	31				7	7	31	14	40.936	0	27.411	492440000	1.02277	1.04306	1.01639	0.983027	1.09911	1.04008	0.941011	0.965864	1.27219	2.69565	0.139091
RPL13A	60S ribosomal protein L13a	0.037106	0.00477886	1.00332	P40429;Q6NVV1	P40429	11	19	40.4				11	11	40.4	40.4	23.577	0	23.922	7895900000	4.64459	4.49618	4.49482	4.47178	4.56326	4.55075	4.48968	4.48457	3.89137	NaN	5.14095
KIAA1524	Protein CIP2A	0.0198532	0.00427246	1.00297	Q8TCG1-2;Q8TCG1	Q8TCG1-2;Q8TCG1	3	5	3.5				3	3	3.5	3.5	84.578	0	3.7276	149960000	-1.45485	-1.43041	-1.71993	-1.59378	-1.56986	-1.50568	-1.62914	-1.51139	-2.75151	-1.08928	-1.95585
PKP3	Plakophilin-3	0.0102047	0.00426292	1.00296	Q9Y446;Q9Y446-2	Q9Y446;Q9Y446-2	2	3	4.6				2	2	4.6	4.6	87.081	0	29.194	82386000	-2.44576	-1.9305	-2.48819	-2.44572	-2.31145	-2.21079	-2.41644	-2.38854	-1.3707	NaN	-2.25258
ATP5D	ATP synthase subunit delta, mitochondrial	0.010151	0.00420094	1.00292	P30049	P30049	2	3	17.3				2	2	17.3	17.3	17.49	0	3.4009	199690000	-0.814779	-0.983398	-0.933363	-0.530344	-0.597708	-0.743326	-1.03747	-0.900185	-5.36152	-0.969783	-1.07239
GAPVD1	GTPase-activating protein and VPS9 domain-containing protein 1	0.00702217	0.00404406	1.00281	Q14C86-3;Q14C86-4;Q14C86-5;Q14C86-2;Q14C86;Q14C86-6	Q14C86-3;Q14C86-4;Q14C86-5;Q14C86-2;Q14C86;Q14C86-6	7	7	6.1				7	7	6.1	6.1	159.75	0	11.225	447970000	0.0105457	0.776583	0.0165882	0.0047493	0.209066	0.243393	0.130701	0.209129	-0.804902	0.783315	0.700715
NME2;NME1;NME2P1	Nucleoside diphosphate kinase B;Nucleoside diphosphate kinase A;Putative nucleoside diphosphate kinase	0.0207951	0.00395155	1.00274	P22392;P22392-2;P15531;P15531-2;O60361	P22392;P22392-2;P15531;P15531-2;O60361	6	15	55.9				6	6	55.9	55.9	17.298	0	18.698	2708100000	2.61736	2.87576	2.82156	2.79998	2.69105	2.8313	2.81862	2.7579	3.03097	2.39183	2.89204
RPS3A	40S ribosomal protein S3a	0.0246182	0.00367594	1.00255	P61247	P61247	14	34	47.7				14	14	47.7	47.7	29.945	0	155.63	5525800000	4.00315	3.91523	3.9269	3.84899	4.01206	3.84538	3.96126	3.86086	3.89906	2.72116	4.21721
PSMB5	Proteasome subunit beta type-5	0.0068449	0.00362253	1.00251	P28074;P28074-3;P28074-2	P28074;P28074-3;P28074-2	2	1	10.6				2	2	10.6	10.6	28.48	0	2.3156	63200000	-3.65226	-2.88097	-3.34674	-3.54673	-3.4554	-3.42863	-3.29109	-3.26607	-1.15779	-1.40948	-3.13712
TIMM17B	Mitochondrial import inner membrane translocase subunit Tim17-B	0.00719313	0.00314188	1.00218	O60830;O60830-2	O60830;O60830-2	3	7	41.9				4	3	34.9	34.9	18.273	0	33.342	779920000	0.618132	0.430798	0.226183	0.399309	0.128281	0.630373	0.295784	0.607416	-1.13941	1.00232	-1.78869
PSMD3	26S proteasome non-ATPase regulatory subunit 3	0.0102013	0.00297976	1.00207	O43242;O43242-2	O43242;O43242-2	13	16	27.9				13	13	27.9	27.9	60.977	0	24.862	707110000	1.80772	2.08937	1.66822	1.73139	1.8322	1.9065	1.76237	1.78371	1.38418	1.76111	1.41179
RAB5A	Ras-related protein Rab-5A	0.00917576	0.00282574	1.00196	P20339-2;P20339	P20339-2;P20339	2	6	31.8				4	2	21.4	21.4	22.178	0	56.394	105430000	-1.41215	-1.11748	-1.46912	-1.29901	-1.21364	-1.20654	-1.47055	-1.41832	-1.38876	-3.85018	-1.85028
CSTF2	Cleavage stimulation factor subunit 2	0.0342095	0.00278616	1.00193	P33240-2;P33240	P33240-2;P33240	2	7	9.5				3	3	9.5	7	59.251	0	22.298	129570000	-1.38445	-1.377	-1.34356	-1.42244	-1.44781	-1.37515	-1.33766	-1.37798	-2.1179	-0.200056	-0.676602
ARFGAP1	ADP-ribosylation factor GTPase-activating protein 1	0.0135604	0.0027132	1.00188	Q8N6T3-5;Q8N6T3;Q8N6T3-2;Q8N6T3-4;Q8N6T3-3	Q8N6T3-5;Q8N6T3;Q8N6T3-2;Q8N6T3-4;Q8N6T3-3	5	9	20.8				5	5	20.8	20.8	39.705	0	52.459	164050000	-0.104156	-0.112865	-0.275539	-0.141739	-0.0756111	-0.0688629	-0.294935	-0.205744	-1.33669	1.86092	-0.854939
UGGT1	UDP-glucose:glycoprotein glucosyltransferase 1	0.0110441	0.0026865	1.00186	Q9NYU2-2;Q9NYU2	Q9NYU2-2;Q9NYU2	7	11	7.4				7	7	7.4	7.4	174.97	0	45.505	687670000	0.602077	0.785423	0.568893	0.696352	0.76038	0.679956	0.469851	0.731813	0.925056	2.33084	-0.483693
NUP188	Nucleoporin NUP188 homolog	0.00775165	0.00260878	1.00181	Q5SRE5-2;Q5SRE5	Q5SRE5-2;Q5SRE5	3	3	2.7				3	3	2.7	2.7	182.29	0	13.857	182180000	-0.947807	-0.839952	-0.854959	-0.463856	-0.805567	-0.677511	-0.846224	-0.787708	-0.295026	0.884734	-0.550908
SMARCA4	Transcription activator BRG1	0.00869472	0.0025115	1.00174	P51532-5;P51532-2;P51532-3;P51532-4;P51532;P51531-2;P51531	P51532-5;P51532-2;P51532-3;P51532-4;P51532	13	15	8.1				13	13	8.1	8.1	181.26	0	20.265	635150000	2.02045	1.63416	2.02877	1.96527	1.90795	1.92511	1.84322	1.96232	1.98359	2.20801	2.31171
TBC1D15	TBC1 domain family member 15	0.0121583	0.00247478	1.00172	Q8TC07-2;Q8TC07-3;Q8TC07	Q8TC07-2;Q8TC07-3;Q8TC07	5	5	7.7				5	5	7.7	7.7	77.394	0	8.7876	173710000	-0.414846	-0.518328	-0.592062	-0.523329	-0.459169	-0.39007	-0.657864	-0.551361	-1.44243	NaN	-0.412055
MZT2A;MZT2B	Mitotic-spindle organizing protein 2A;Mitotic-spindle organizing protein 2B	0.00842235	0.00221443	1.00154	Q6P582;Q6NZ67	Q6P582;Q6NZ67	2	4	18.4				2	2	18.4	18.4	16.22	0	3.4608	70706000	-0.982391	-0.984823	-1.14134	-0.847984	-0.91923	-0.886543	-1.17587	-0.983751	-0.517775	-1.45676	-1.80509
RAB14	Ras-related protein Rab-14	0.00564548	0.00197268	1.00137	P61106	P61106	8	13	56.3				9	9	56.3	50.7	23.897	0	51.538	1131500000	1.6435	1.97379	1.5235	1.52497	1.76225	1.70931	1.53465	1.65166	1.3304	0.555923	1.65056
UMPS	Uridine 5-monophosphate synthase;Orotate phosphoribosyltransferase;Orotidine 5-phosphate decarboxylase	0.00988389	0.00184059	1.00128	P11172-2;P11172-3;P11172;P11172-4	P11172-2;P11172-3;P11172;P11172-4	6	9	23.5				6	6	23.5	23.5	33.051	0	10.539	302940000	0.146616	0.261091	0.00115967	0.0376167	0.0941811	0.164577	0.119946	0.0604172	-0.973322	-0.446757	0.353925
MTA2	Metastasis-associated protein MTA2	0.0162153	0.00167894	1.00116	O94776;O94776-2;Q9BTC8-2;Q9BTC8	O94776;O94776-2	4	4	6.9				4	4	6.9	6.9	75.022	0	7.7428	249710000	-1.02506	-0.997841	-1.07061	-1.01967	-1.04817	-0.981138	-0.979132	-1.11146	0.132062	-1.51631	-0.146155
PGRMC1	Membrane-associated progesterone receptor component 1	0.0125097	0.00164223	1.00114	O00264;O00264-2	O00264;O00264-2	4	6	28.2				4	4	28.2	28.2	21.671	0	42.124	995610000	2.00534	1.96789	1.91067	2.07034	2.0333	2.00415	1.90233	2.00789	1.67139	1.34571	1.81065
MCM7	DNA replication licensing factor MCM7	0.0106084	0.0014677	1.00102	P33993;P33993-2;P33993-3	P33993;P33993-2;P33993-3	4	6	9				5	5	9	7.5	81.307	0	8.1517	110110000	-1.12564	-1.26418	-1.16975	-1.04737	-1.16051	-1.16486	-1.12037	-1.16709	-1.66113	-1.63127	-1.28625
DSTN	Destrin	0.00762325	0.00139189	1.00097	P60981;P60981-2	P60981;P60981-2	2	3	29.1				4	3	22.4	15.2	18.506	0	3.0456	129480000	-1.74577	-1.57643	-1.63386	-1.76091	-1.72103	-1.69403	-1.55887	-1.74861	-3.79571	-0.109342	-1.16008
ATP2A2	Sarcoplasmic/endoplasmic reticulum calcium ATPase 2	0.00451704	0.00107861	1.00075	P16615;P16615-5;P16615-2;P16615-3;P16615-4;O14983-2;O14983;O14983-3;Q93084-4;Q93084-2;Q93084-3;Q93084-7;Q93084;Q93084-6;Q93084-5	P16615;P16615-5;P16615-2;P16615-3;P16615-4	22	42	26.4				22	22	26.4	26.4	114.76	0	93.986	4276700000	3.17816	3.31964	3.00831	3.15103	3.17738	3.27267	3.03916	3.16361	6.79895	8.53671	2.26741
SLC25A1	Tricarboxylate transport protein, mitochondrial	0.00144116	0.000879765	1.00061	P53007	P53007	6	8	22.5				6	6	22.5	22.5	34.012	0	6.9767	1145300000	1.65553	2.17035	1.40166	1.32189	1.60116	1.80997	1.47947	1.65531	0.907202	2.29622	0.0257578
LUC7L3	Luc7-like protein 3	0.00191786	0.000727654	1.0005	O95232;O95232-2	O95232;O95232-2	2	4	3.7				2	2	3.7	3.7	51.466	0.00076278	1.7176	114120000	-0.316444	-0.670092	-0.189732	-0.19792	-0.410975	-0.455118	-0.196264	-0.314741	0.271201	0.434958	0.623881
ERH	Enhancer of rudimentary homolog	0.0023859	0.000721455	1.0005	P84090	P84090	3	5	30.8				3	3	30.8	30.8	12.259	0	25.512	221830000	-1.52753	-1.51167	-1.18079	-1.52608	-1.41212	-1.59352	-1.39307	-1.35024	-1.63473	-2.35742	0.126962
TNPO3	Transportin-3	0.000941513	0.000301361	1.00021	Q9Y5L0-3;Q9Y5L0;Q9Y5L0-1;Q9Y5L0-5	Q9Y5L0-3;Q9Y5L0;Q9Y5L0-1;Q9Y5L0-5	4	5	7.2				4	4	7.2	7.2	102.54	0	8.2666	284040000	0.628139	0.805756	0.43358	0.369244	0.506004	0.624744	0.476423	0.628342	-0.963077	NaN	0.0254622
CARM1	Histone-arginine methyltransferase CARM1	0.00104242	-0.00022459	0.999844	Q86X55;Q86X55-1;Q86X55-2	Q86X55;Q86X55-1;Q86X55-2	6	13	12.3				6	6	12.3	12.3	65.853	0	36.603	470470000	2.54095	2.64985	2.50147	2.41368	2.56415	2.64019	2.39099	2.51153	1.52328	0.108574	1.34958
SPC24	Kinetochore protein Spc24	0.00156984	-0.00039959	0.999723	Q8NBT2;Q8NBT2-2	Q8NBT2;Q8NBT2-2	4	5	36				4	4	36	36	22.478	0	25.997	172250000	-0.95727	-0.842533	-1.07453	-0.90527	-1.07103	-0.801027	-1.0542	-0.851753	NaN	0.327085	-1.99824
DDRGK1	DDRGK domain-containing protein 1	0.00370342	-0.000820637	0.999431	Q96HY6;Q96HY6-2	Q96HY6;Q96HY6-2	3	5	13.1				3	3	13.1	13.1	35.61	0	6.1088	122640000	-1.00426	-0.962959	-0.902884	-0.88505	-0.786522	-0.882074	-1.10897	-0.974302	-0.470872	-1.47423	-1.69707
ARMC6	Armadillo repeat-containing protein 6	0.00674386	-0.000934601	0.999352	Q6NXE6-2;Q6NXE6	Q6NXE6-2;Q6NXE6	5	8	9				5	5	9	9	51.547	0	6.6405	698200000	1.12439	1.12184	1.013	1.0026	1.02587	1.11744	0.997065	1.12518	0.803978	0.0518179	0.199634
PREB	Prolactin regulatory element-binding protein	0.00301284	-0.0012598	0.999127	Q9HCU5	Q9HCU5	4	4	19.7				4	4	19.7	19.7	45.468	0	16.661	203470000	-1.23905	-0.711952	-1.2838	-1.15334	-1.14199	-0.954767	-1.15831	-1.12804	NaN	-0.792489	-2.13859
ZC3HAV1	Zinc finger CCCH-type antiviral protein 1	0.00688008	-0.00171185	0.998814	Q7Z2W4-3;Q7Z2W4-2;Q7Z2W4	Q7Z2W4-3;Q7Z2W4-2;Q7Z2W4	2	2	6.2				2	2	6.2	6.2	67.589	0	10.2	70763000	-2.10019	-2.18185	-2.25147	-1.91808	-2.20147	-1.99847	-2.13277	-2.11204	-5.89171	NaN	-1.84726
UBE3C	Ubiquitin-protein ligase E3C	0.00696898	-0.0018754	0.998701	Q15386;Q15386-3;Q15386-2	Q15386;Q15386-3;Q15386-2	2	3	3				2	2	3	3	123.92	0	10.75	40881000	-2.62966	-2.52783	-2.77547	-2.53008	-2.54407	-2.50779	-2.81409	-2.58959	NaN	NaN	-3.73915
GNL2	Nucleolar GTP-binding protein 2	0.00581705	-0.00195646	0.998645	Q13823	Q13823	2	2	3.1				2	2	3.1	3.1	83.654	0	3.3309	60066000	-1.57562	-1.76752	-1.7445	-1.94174	-1.54586	-1.95699	-1.7508	-1.76789	-1.77131	NaN	-1.42125
ILF2	Interleukin enhancer-binding factor 2	0.00655082	-0.00299644	0.997925	Q12905	Q12905	2	2	12.1				2	2	12.1	12.1	43.062	0	12.628	56568000	-3.39054	-3.85695	-3.29155	-3.3174	-3.6522	-3.40827	-3.28772	-3.49627	NaN	NaN	-2.77681
MCM3	DNA replication licensing factor MCM3	0.04011	-0.00364447	0.997477	P25205;P25205-2	P25205;P25205-2	8	12	14.9				8	8	14.9	14.9	90.98	0	52.895	435270000	0.794031	0.710613	0.814859	0.722054	0.717108	0.755762	0.784647	0.798618	0.930653	1.33383	0.91574
ETFA	Electron transfer flavoprotein subunit alpha, mitochondrial	0.0120922	-0.00408792	0.99717	P13804-2;P13804	P13804-2;P13804	2	4	6				2	2	6	6	30.025	0	2.459	506010000	0.127102	0.175089	0.000555038	0.247692	0.197859	-0.113052	0.37435	0.107634	0.244043	-0.548395	1.17502
SF3B2	Splicing factor 3B subunit 2	0.0196927	-0.00427103	0.997044	Q13435	Q13435	8	10	11.6				8	8	11.6	11.6	100.23	0	12.017	592620000	1.07378	1.20959	0.905239	0.931435	0.97743	1.08302	1.04503	1.03164	1.17454	-2.09114	2.02319
TCP1	T-complex protein 1 subunit alpha	0.022811	-0.00434351	0.996994	P17987	P17987	20	41	43.5				20	20	43.5	43.5	60.343	0	108.98	4386900000	3.66743	3.7537	3.8156	3.70535	3.81977	3.62041	3.66784	3.85143	5.42765	6.53124	4.11482
AKAP8L	A-kinase anchor protein 8-like	0.0215688	-0.00560093	0.996125	Q9ULX6-2;Q9ULX6	Q9ULX6-2;Q9ULX6	4	5	9.4				4	4	9.4	9.4	65.229	0	12.452	211300000	-0.48645	-0.261372	-0.569221	-0.590635	-0.405836	-0.381155	-0.574455	-0.523829	-0.0426941	-2.04084	-0.285228
MCM6	DNA replication licensing factor MCM6	0.0260542	-0.0059309	0.995897	Q14566	Q14566	2	2	3.2				2	2	3.2	3.2	92.888	0.00342	1.2931	51945000	-2.11176	-2.19361	-2.04189	-2.18864	-2.31892	-2.13166	-1.99995	-2.06164	-1.1169	-3.34605	-0.533521
GPATCH4	G patch domain-containing protein 4	0.0552598	-0.00593519	0.995894	Q5T3I0-3;Q5T3I0;Q5T3I0-2	Q5T3I0-3;Q5T3I0	3	4	9.3				3	3	9.3	9.3	50.927	0	10.133	39438000	-3.04917	-2.96631	-3.096	-3.09654	-2.99505	-3.0251	-3.0702	-3.09393	-1.60629	-1.99082	-2.67501
DHRS7	Dehydrogenase/reductase SDR family member 7	0.0474221	-0.00614738	0.995748	Q9Y394-2;Q9Y394	Q9Y394-2;Q9Y394	2	3	6.6				2	2	6.6	6.6	32.267	0	2.8585	100770000	-1.19164	-1.12132	-1.1735	-1.17121	-1.03875	-1.20934	-1.15582	-1.22918	-0.966484	NaN	-0.888463
RPS29	40S ribosomal protein S29	0.0108971	-0.00633144	0.995621	P62273;P62273-2	P62273;P62273-2	2	2	32.1				2	2	32.1	32.1	6.6767	0	2.8511	135010000	-1.84366	-1.20618	-1.81445	-2.01861	-1.79286	-1.49425	-1.69354	-1.87692	-1.78126	-1.49316	-0.948865
SDHB	Succinate dehydrogenase [ubiquinone] iron-sulfur subunit, mitochondrial	0.011223	-0.00634098	0.995614	P21912	P21912	2	2	10.4				2	2	10.4	10.4	31.629	0	6.3653	30250000	-3.042	-2.29726	-2.74625	-3.01559	-2.75607	-2.5708	-2.78987	-2.95899	-3.15043	-5.52656	-2.93372
SMPD4	Sphingomyelin phosphodiesterase 4	0.0183114	-0.006598	0.995437	Q9NXE4-10;Q9NXE4-8;Q9NXE4-6;Q9NXE4-2;Q9NXE4-9;Q9NXE4-7;Q9NXE4-3;Q9NXE4;Q9NXE4-4;Q9NXE4-5	Q9NXE4-10;Q9NXE4-8;Q9NXE4-6;Q9NXE4-2;Q9NXE4-9;Q9NXE4-7;Q9NXE4-3;Q9NXE4;Q9NXE4-4	3	4	7.2				3	3	7.2	7.2	60.173	0	3.1343	79898000	-2.5885	-2.33047	-2.83576	-2.63842	-2.73204	-2.42623	-2.57149	-2.63699	-4.81972	-1.97628	-3.48685
SEC23A	Protein transport protein Sec23A	0.0384311	-0.00693083	0.995207	Q15436;Q15436-2	Q15436;Q15436-2	7	10	16.1				8	8	16.1	14.8	86.16	0	98.683	495350000	0.971008	0.758621	0.85376	0.883221	0.911354	0.981865	0.795578	0.805536	1.53599	1.65699	1.4565
IQGAP1	Ras GTPase-activating-like protein IQGAP1	0.0313156	-0.00704098	0.995131	P46940	P46940	6	9	4.5				6	6	4.5	4.5	189.25	0	17.565	232700000	-0.325499	-0.378466	-0.398184	-0.0981731	-0.270418	-0.228807	-0.392151	-0.280781	0.829473	1.0503	-0.078866
DPYSL2	Dihydropyrimidinase-related protein 2	0.0228532	-0.00727129	0.994973	Q16555-2;Q16555;Q14194;Q14194-2	Q16555-2;Q16555	5	18	20.9				6	6	20.9	17.9	58.162	0	55.183	1096700000	1.91464	2.1069	1.7998	1.79702	1.97828	2.08199	1.70326	1.88391	2.09595	1.74027	2.79657
HAX1	HCLS1-associated protein X-1	0.0423755	-0.00730181	0.994952	O00165-5;O00165-3;O00165;O00165-2	O00165-5;O00165-3;O00165;O00165-2	4	8	25.5				4	4	25.5	25.5	26.099	0	23.807	369420000	0.323837	0.36993	0.165588	0.236969	0.334743	0.33659	0.169964	0.284235	0.557041	-0.677148	-0.958495
DDX3X;DDX3Y	ATP-dependent RNA helicase DDX3X;ATP-dependent RNA helicase DDX3Y	0.0293448	-0.00736809	0.994906	O00571;O00571-2;O15523-2;O15523;O15523-3;Q9NQI0-3;Q9NQI0-2;Q9NQI0-4;Q9NQI0	O00571;O00571-2;O15523-2;O15523	35	75	58.6				36	36	58.6	58.6	73.243	0	124.25	11987000000	4.76594	4.89888	4.62272	4.67663	4.68354	4.91711	4.63556	4.75744	4.10704	4.81116	4.4914
COX6B1	Cytochrome c oxidase subunit 6B1	0.0179727	-0.00788498	0.994549	P14854	P14854	2	3	45.3				2	2	45.3	45.3	10.192	0	35.078	274400000	-0.582146	-0.21048	-0.63776	-0.739061	-0.439056	-0.470057	-0.8146	-0.414194	-0.378909	-0.693522	-2.70082
BCAP31	B-cell receptor-associated protein 31	0.017257	-0.00794983	0.994505	P51572;P51572-2	P51572;P51572-2	9	17	34.6				9	9	34.6	34.6	27.991	0	14.449	4496900000	3.60484	4.11968	3.49209	3.47537	3.78715	3.64947	3.61623	3.67093	3.53246	1.82349	3.33002
ERP29	Endoplasmic reticulum resident protein 29	0.0298872	-0.00867796	0.994003	P30040	P30040	2	2	14.9				2	2	14.9	14.9	28.993	0	1.8499	46292000	-2.90558	-2.85155	-2.64397	-2.48907	-2.74861	-2.75177	-2.7179	-2.63718	-2.0436	NaN	-1.7051
GTF3C4	General transcription factor 3C polypeptide 4	0.0455532	-0.00980377	0.993228	Q9UKN8	Q9UKN8	3	4	6.2				3	3	6.2	6.2	91.981	0	13.987	75698000	-1.23053	-1.20425	-1.37577	-1.28873	-1.16087	-1.15404	-1.41773	-1.32743	-4.14285	-2.43276	-2.24866
UQCRC1	Cytochrome b-c1 complex subunit 1, mitochondrial	0.0277309	-0.0101099	0.993017	P31930	P31930	4	4	12.9				4	4	12.9	12.9	52.645	0	79.377	108300000	0.294403	0.180761	0.0858097	0.166618	0.449835	0.330477	-0.0290375	0.016758	NaN	-6.71487	-1.83229
RAB1A	Ras-related protein Rab-1A	0.0502163	-0.0103555	0.992848	P62820;P62820-2;P62820-3	P62820;P62820-2	4	11	71.7				11	9	62.9	36.1	22.677	0	28.648	2012600000	2.13632	2.18004	2.07867	2.10722	2.28649	2.21286	1.9858	2.05851	0.673198	1.55234	1.8867
PRPF3	U4/U6 small nuclear ribonucleoprotein Prp3	0.0237466	-0.0104623	0.992774	O43395;O43395-3	O43395	3	3	5.7				3	3	5.7	5.7	77.528	0	2.8939	144610000	-0.752502	-0.255341	-0.833242	-0.92395	-0.669697	-0.651258	-0.727692	-0.67454	0.8585	-0.576451	-0.116221
MRPL11	39S ribosomal protein L11, mitochondrial	0.0861606	-0.0113258	0.99218	Q9Y3B7-2;Q9Y3B7-3;Q9Y3B7	Q9Y3B7-2;Q9Y3B7-3;Q9Y3B7	2	2	16.3				2	2	16.3	16.3	18.205	0	6.6423	180740000	-0.825544	-0.763374	-0.86824	-0.978807	-0.879217	-0.861731	-0.812309	-0.837406	-0.592861	-2.04743	0.0481367
TNRC6A	Trinucleotide repeat-containing gene 6A protein	0.0341078	-0.0116625	0.991949	Q8NDV7-2;Q8NDV7-6;Q8NDV7-5;Q8NDV7;Q8NDV7-3;Q8NDV7-4	Q8NDV7-2;Q8NDV7-6;Q8NDV7-5;Q8NDV7	18	36	15.1				19	19	15.1	14.4	182.05	0	230.03	3365300000	3.35271	3.25382	3.24379	3.34624	3.55882	3.43813	3.05746	3.18881	2.63321	1.2962	4.13848
HELLS	Lymphoid-specific helicase	0.0563464	-0.0117388	0.991896	Q9NRZ9-3;Q9NRZ9-2;Q9NRZ9;Q9NRZ9-6;Q9NRZ9-5;Q9NRZ9-4	Q9NRZ9-3;Q9NRZ9-2;Q9NRZ9;Q9NRZ9-6;Q9NRZ9-5;Q9NRZ9-4	2	2	2.9				2	2	2.9	2.9	93.322	0	2.0912	36760000	-2.68822	-2.84528	-2.90113	-2.62558	-2.82607	-2.74807	-2.77823	-2.66088	-5.95772	NaN	-2.82751
DPM1	Dolichol-phosphate mannosyltransferase subunit 1	0.037808	-0.012002	0.991715	O60762	O60762	5	8	15.8				5	5	15.8	15.8	29.634	0	4.3875	474140000	0.855341	1.05527	0.606228	0.77956	0.920502	0.944923	0.697477	0.781507	-1.36182	-2.25007	0.227492
IPO7	Importin-7	0.103519	-0.0120835	0.991659	O95373	O95373	9	26	10.9				9	9	10.9	10.9	119.52	0	30.181	1785700000	2.29897	2.28136	2.20309	2.35002	2.28715	2.34513	2.21305	2.33644	2.0442	1.88081	1.7047
MTX2	Metaxin-2	0.038851	-0.0122161	0.991568	O75431-2;O75431	O75431-2;O75431	2	4	11.5				2	2	11.5	11.5	28.823	0	7.3673	196230000	-0.71067	-0.551916	-0.921188	-0.921482	-0.713022	-0.629898	-0.920326	-0.793146	-1.0653	-0.385392	-1.49914
EIF2B2	Translation initiation factor eIF-2B subunit beta	0.0524418	-0.0126333	0.991281	P49770	P49770	2	3	4.3				2	2	4.3	4.3	38.989	0.0034916	1.3489	94620000	-1.72886	-1.54693	-1.79337	-1.79581	-1.6178	-1.60165	-1.8664	-1.72859	-0.329706	0.910485	-2.95113
ARAF	Serine/threonine-protein kinase A-Raf	0.0710071	-0.0129151	0.991088	P10398;P10398-2;P15056	P10398	2	2	5.9				3	2	4.3	4.3	67.585	0	2.1744	54822000	-2.82369	-2.79798	-2.86059	-2.88302	-2.68319	-2.77027	-2.95586	-2.90429	-1.20842	-1.76224	-2.9832
EIF3I	Eukaryotic translation initiation factor 3 subunit I	0.0986232	-0.0130372	0.991004	Q13347	Q13347	6	9	23.4				6	6	23.4	23.4	36.501	0	30.535	374890000	0.426054	0.608324	0.505188	0.449478	0.473341	0.457735	0.566761	0.543356	0.889572	0.0998001	1.36737
PPP2R1A	Serine/threonine-protein phosphatase 2A 65 kDa regulatory subunit A alpha isoform	0.224596	-0.0130959	0.990964	P30153;P30154-4;P30154;P30154-3;P30154-2;P30154-5	P30153	17	23	39.7				17	17	39.7	39.7	65.308	0	48.155	3859600000	3.31738	3.26966	3.24437	3.31375	3.27914	3.28051	3.29351	3.34438	2.93568	2.32782	3.43393
CUL2	Cullin-2	0.0646644	-0.0131426	0.990932	Q13617;Q13617-2	Q13617;Q13617-2	9	13	11.7				9	9	11.7	11.7	86.982	0	29.309	517020000	1.19093	1.19299	0.99614	1.00435	1.10515	1.21378	0.98876	1.12929	1.48049	-0.693832	0.495658
RPL19	60S ribosomal protein L19	0.103347	-0.0132203	0.990878	P84098	P84098	8	17	27.6				8	8	27.6	27.6	23.466	0	23.367	2936000000	2.77079	2.89482	2.7897	2.72916	2.89716	2.80972	2.77119	2.75927	1.88731	1.16593	3.39742
CPSF1	Cleavage and polyadenylation specificity factor subunit 1	0.0547545	-0.0132756	0.99084	Q10570	Q10570	4	4	4.2				4	4	4.2	4.2	160.88	0	9.9322	38595000	-2.57076	-2.77641	-2.72517	-2.62031	-2.55042	-2.5245	-2.79905	-2.76558	-1.66721	-1.28462	-2.7493
CSTF1	Cleavage stimulation factor subunit 1	0.0435067	-0.0133815	0.990768	Q05048	Q05048	2	4	6.3				2	2	6.3	6.3	48.357	0	5.6283	61250000	-2.22648	-1.93365	-2.38288	-2.36361	-2.17289	-2.16261	-2.27235	-2.24524	-5.93575	-1.28352	-1.62326
NDUFS2	NADH dehydrogenase [ubiquinone] iron-sulfur protein 2, mitochondrial	0.0413262	-0.0135012	0.990685	O75306-2;O75306	O75306-2;O75306	4	5	12.3				4	4	12.3	12.3	51.851	0	10.63	212280000	-0.290396	-0.292631	-0.270788	0.133757	-0.0655041	-0.120871	-0.232506	-0.247173	-0.584919	-3.00019	-0.314054
RPL9	60S ribosomal protein L9	0.0302133	-0.0137968	0.990482	P32969	P32969	4	6	30.7				4	4	30.7	30.7	21.863	0	8.9411	188580000	0.0338802	-0.24848	0.0932961	-0.0909176	-0.136192	-0.236761	0.36787	-0.151951	0.434198	0.033639	1.86604
LRRK2	Leucine-rich repeat serine/threonine-protein kinase 2	0.050987	-0.0140009	0.990342	Q5S007001;Q5S007	Q5S007001;Q5S007	6	8	3.2				6	6	3.2	3.2	286	0	9.0767	295140000	-0.115391	0.0296822	-0.222351	-0.171404	0.0137539	0.0431519	-0.280613	-0.199753	0.729897	0.412746	-1.20369
CCDC47	Coiled-coil domain-containing protein 47	0.0729074	-0.0142474	0.990173	Q96A33;Q96A33-2	Q96A33;Q96A33-2	7	13	14.9				7	7	14.9	14.9	55.873	0	56.328	536690000	1.1419	1.28246	1.14807	1.16414	1.27065	1.32293	1.04724	1.15275	1.92561	2.02953	0.95564
NKRF	NF-kappa-B-repressing factor	0.0976545	-0.0147219	0.989847	O15226;O15226-2	O15226;O15226-2	5	7	7.7				5	5	7.7	7.7	77.672	0	10.165	368210000	-0.126022	-0.0842609	-0.0870571	-0.021162	0.037838	-0.00827789	-0.19179	-0.0973854	0.270188	-0.573398	0.741538
RHOT1	Mitochondrial Rho GTPase 1	0.0625133	-0.0147781	0.989809	Q8IXI2-4;Q8IXI2;Q8IXI2-5;Q8IXI2-2;Q8IXI2-7;Q8IXI2-3;Q8IXI2-6	Q8IXI2-4;Q8IXI2;Q8IXI2-5;Q8IXI2-2;Q8IXI2-7;Q8IXI2-3;Q8IXI2-6	2	2	5.9				2	2	5.9	5.9	66.54	0	6.3398	18912000	-2.61991	-2.45673	-2.48446	-2.24706	-2.41564	-2.40363	-2.53569	-2.39409	-2.31271	-0.652875	-3.32818
CEP290	Centrosomal protein of 290 kDa	0.0438603	-0.0150614	0.989615	O15078	O15078	2	10	1				2	2	1	1	290.38	0	1.8354	2863700000	0.970627	1.09011	0.818638	1.03966	1.16948	1.1496	0.727001	0.933195	-0.263462	0.399959	-4.18626
LYPLA2	Acyl-protein thioesterase 2	0.0691599	-0.0152798	0.989465	O95372	O95372	2	3	6.9				2	2	6.9	6.9	24.737	0	2.2455	152070000	-0.795483	-0.863705	-1.02291	-0.878893	-0.914255	-0.721657	-1.02056	-0.843405	-0.405021	NaN	-0.519517
SSR4	Translocon-associated protein subunit delta	0.030013	-0.0158205	0.989094	P51571	P51571	2	5	12.1				2	2	12.1	12.1	18.998	0	46.877	406020000	-0.908409	-0.321468	-1.0177	-1.04468	-0.637554	-0.814222	-0.94136	-0.835842	-1.96163	NaN	-1.0049
AHSA1	Activator of 90 kDa heat shock protein ATPase homolog 1	0.0852951	-0.0158267	0.98909	O95433;O95433-2	O95433;O95433-2	2	3	6.5				2	2	6.5	6.5	38.274	0	2.1277	95673000	-1.39128	-1.17124	-1.21724	-1.33227	-1.27022	-1.38403	-1.19568	-1.19881	-4.83608	NaN	-0.216294
AKAP12	A-kinase anchor protein 12	0.0640347	-0.0161595	0.988862	Q02952-3;Q02952-2;Q02952	Q02952-3;Q02952-2;Q02952	2	1	2				2	2	2	2	180.99	0.00075188	1.6646	24412000	-4.29458	-4.44695	-4.1086	-4.2754	-4.34879	-4.25321	-4.10839	-4.35051	NaN	NaN	-3.66493
NNT	NAD(P) transhydrogenase, mitochondrial	0.0341776	-0.0162849	0.988776	Q13423	Q13423	2	3	2.1				2	2	2.1	2.1	113.89	0	3.0229	49638000	-2.67181	-2.1627	-2.74085	-2.71284	-2.34491	-2.46721	-2.73163	-2.67932	-4.31006	-2.72603	-2.66313
TUBB	Tubulin beta chain	0.081072	-0.0168028	0.988421	P07437;A6NNZ2;CON__ENSEMBL:ENSBTAP00000025008;Q9H4B7	P07437	6	35	62.8				25	7	20.5	17.1	49.67	0	184.21	23970000000	5.20437	5.32399	5.03646	5.08391	5.17202	5.27184	5.08663	5.18544	3.74757	5.02515	4.75128
MKI67	Antigen KI-67	0.128923	-0.0168777	0.988369	P46013-2;P46013	P46013-2;P46013	8	10	4.6				8	8	4.6	4.6	319.44	0	10.67	342280000	1.62996	1.48259	1.5743	1.55818	1.48453	1.67131	1.56275	1.59396	3.85592	5.1963	2.05406
DNAJC7	DnaJ homolog subfamily C member 7	0.203236	-0.0170407	0.988258	Q99615;Q99615-2	Q99615;Q99615-2	11	13	31.6				11	11	31.6	31.6	56.44	0	36.239	367380000	0.655821	0.62587	0.519745	0.555077	0.605942	0.594452	0.637241	0.58704	0.991443	0.481614	0.988093
RPS10	40S ribosomal protein S10	0.102667	-0.0171776	0.988164	P46783;Q9NQ39	P46783	5	10	25.5				5	5	25.5	25.5	18.898	0	6.4175	1237600000	1.68459	1.64685	1.62174	1.62425	1.66049	1.60281	1.82862	1.55423	1.40206	1.64042	2.06451
HIST1H1C;HIST1H1E;HIST1H1D;HIST1H1B	Histone H1.2;Histone H1.4;Histone H1.3;Histone H1.5	0.0127642	-0.0179558	0.987631	P16403;P10412;P16402;P16401;P22492;Q02539	P16403;P10412;P16402;P16401	6	14	30				6	6	30	30	21.364	0	28.305	1905700000	2.32009	1.87737	3.54349	2.92961	2.15661	2.32846	3.52858	2.72872	3.35361	0.208009	4.74545
RPS3	40S ribosomal protein S3	0.0730033	-0.0181012	0.987532	P23396;P23396-2	P23396;P23396-2	19	46	71.6				20	20	71.6	68.7	26.688	0	59.875	13553000000	4.58504	4.5787	4.38861	4.369	4.31657	4.60537	4.48145	4.59037	4.25196	2.67349	4.21942
TUBB4B;TUBB4A	Tubulin beta-4B chain;Tubulin beta-4A chain	0.113723	-0.0181375	0.987507	P68371;P04350;Q13509-2	P68371;P04350	4	110	60.9				25	25	60.9	7.9	49.83	0	323.31	53675000000	6.4323	6.55068	6.31322	6.32965	6.46106	6.45046	6.36155	6.42533	6.31064	6.05909	5.72452
CALM1	Calmodulin	0.0360346	-0.0185075	0.987254	P62158	P62158	4	7	40.9				4	4	40.9	40.9	16.837	0	9.5276	433830000	0.084341	0.0296192	0.473591	0.391733	0.358887	-0.0953674	0.567924	0.22187	0.469391	-1.30366	0.807261
TARDBP	TAR DNA-binding protein 43	0.127227	-0.0185213	0.987244	Q13148;Q13148-4	Q13148	9	17	31.4				9	9	31.4	31.4	44.739	0	65.792	2420700000	3.73659	3.67519	3.56456	3.6257	3.64077	3.77641	3.58305	3.6759	2.52887	-1.21073	2.9175
TUBA1B;TUBA4A	Tubulin alpha-1B chain;Tubulin alpha-4A chain	0.0930173	-0.0191307	0.986827	P68363;P68363-2;P68366-2;P68366;A6NHL2-2;A6NHL2;Q9H853	P68363;P68363-2;P68366-2;P68366	2	138	69.8				29	29	69.8	3.1	50.151	0	323.31	105190000000	7.37431	7.48224	7.18517	7.18849	7.29576	7.35752	7.29951	7.35394	6.02073	4.58644	6.71294
IMMT	MICOS complex subunit MIC60	0.0934936	-0.0192571	0.986741	Q16891-2;Q16891-4;Q16891;Q16891-3	Q16891-2;Q16891-4;Q16891;Q16891-3	34	76	53				34	34	53	53	82.624	0	74.296	6353900000	4.74208	4.64329	4.53942	4.70708	4.75655	4.79768	4.53697	4.61772	4.07124	3.92216	4.03535
PAICS	Multifunctional protein ADE2;Phosphoribosylaminoimidazole-succinocarboxamide synthase;Phosphoribosylaminoimidazole carboxylase	0.0531048	-0.0203099	0.986021	P22234;P22234-2	P22234;P22234-2	7	13	22.6				7	7	22.6	22.6	47.079	0	27.935	428910000	1.83538	1.90885	2.14125	1.95539	1.78675	1.84138	2.31078	1.9832	1.9972	0.0585279	3.44443
GTF2B	Transcription initiation factor IIB	0.104629	-0.0208106	0.985679	Q00403	Q00403	3	4	14.9				3	3	14.9	14.9	34.833	0	4.4044	181190000	-0.343266	-0.356083	-0.541664	-0.410269	-0.555372	-0.29904	-0.38788	-0.325747	-1.7818	0.0262756	-0.997544
DNAJA3	DnaJ homolog subfamily A member 3, mitochondrial	0.052206	-0.0208621	0.985644	Q96EY1;Q96EY1-3;Q96EY1-2	Q96EY1;Q96EY1-3;Q96EY1-2	2	2	6				2	2	6	6	52.488	0	4.1844	31954000	-3.76888	-3.93462	-4.05241	-3.53231	-3.71112	-3.67238	-4.04354	-3.77772	-2.51568	NaN	-4.29173
SAE1	SUMO-activating enzyme subunit 1;SUMO-activating enzyme subunit 1, N-terminally processed	0.184066	-0.0209851	0.985559	Q9UBE0-2;Q9UBE0-3;Q9UBE0	Q9UBE0-2;Q9UBE0-3;Q9UBE0	2	3	11.3				2	2	11.3	11.3	29.811	0	2.038	53262000	-1.55304	-1.48749	-1.40912	-1.4934	-1.44068	-1.55183	-1.39295	-1.47365	-0.966655	0.552945	-1.14726
MSH6	DNA mismatch repair protein Msh6	0.139658	-0.0212255	0.985395	P52701;P52701-4;P52701-2;P52701-3	P52701;P52701-4;P52701-2;P52701-3	4	4	3.8				4	4	3.8	3.8	152.78	0	3.8945	84358000	-1.92913	-1.88756	-2.01509	-1.89109	-1.79504	-1.85919	-1.98926	-1.99447	-2.829	0.316917	-1.42988
GPS1	COP9 signalosome complex subunit 1	0.0889438	-0.021976	0.984883	Q13098-5;Q13098;Q13098-7;Q13098-6	Q13098-5;Q13098;Q13098-7	3	4	12.3				3	3	12.3	12.3	55.092	0	8.9397	52755000	-2.49374	-2.36456	-2.69026	-2.68923	-2.65237	-2.47505	-2.54299	-2.47947	-2.49378	-1.85933	-1.92311
SF3A3	Splicing factor 3A subunit 3	0.153346	-0.022162	0.984756	Q12874	Q12874	3	3	7.6				3	3	7.6	7.6	58.848	0	11.132	112200000	-1.53716	-1.48578	-1.55279	-1.64922	-1.60193	-1.5774	-1.40757	-1.5494	-1.82915	NaN	-0.665484
2002-09-01	Septin-2	0.0854344	-0.0222111	0.984722	Q15019;Q15019-3;Q15019-2	Q15019;Q15019-3;Q15019-2	2	4	7.8				2	2	7.8	7.8	41.487	0	2.5724	31955000	-2.87843	-2.54317	-2.6572	-2.72095	-2.67877	-2.4993	-2.77612	-2.7567	-3.85585	-2.48384	-1.89093
RARS	Arginine--tRNA ligase, cytoplasmic	0.184995	-0.022244	0.9847	P54136;P54136-2	P54136;P54136-2	10	18	16.4				10	10	16.4	16.4	75.378	0	57.628	884580000	1.56824	1.67775	1.45645	1.54211	1.56604	1.57029	1.61685	1.58035	-0.582042	0.44443	1.93172
TBRG4	Protein TBRG4	0.103595	-0.0227227	0.984373	Q969Z0-2;Q969Z0	Q969Z0-2;Q969Z0	4	7	6.9				4	4	6.9	6.9	58.442	0	6.9728	228070000	-0.52599	-0.573776	-0.526846	-0.262751	-0.436871	-0.385031	-0.561756	-0.414814	-0.959423	0.913101	-0.831277
FKBP8	Peptidyl-prolyl cis-trans isomerase FKBP8	0.0349631	-0.0227456	0.984358	Q14318-2;Q14318;Q14318-3	Q14318-2;Q14318	5	10	16.7				5	5	16.7	16.7	44.648	0	40.636	480350000	1.1213	1.71003	0.77282	0.853285	1.08759	1.33618	0.982836	1.14181	-0.337019	-1.20086	0.107354
C19orf25	UPF0449 protein C19orf25	0.0887879	-0.0229058	0.984248	Q9UFG5	Q9UFG5	2	3	18.6				2	2	18.6	18.6	12.878	0	2.3303	39223000	-3.27079	-3.42597	-3.31991	-3.05072	-3.1236	-3.2346	-3.37048	-3.2471	-1.76759	1.64694	-3.58667
DDX5	Probable ATP-dependent RNA helicase DDX5	0.131288	-0.0230222	0.984169	P17844;P17844-2	P17844;P17844-2	17	45	44.5				27	26	44.5	33.9	69.147	0	44.303	7097300000	4.46969	4.2796	4.489	4.30452	4.30986	4.48942	4.42877	4.40685	3.75996	3.44651	4.40502
GTF2I	General transcription factor II-I	0.156998	-0.023654	0.983738	P78347-2;P78347-4;P78347-3;P78347;P78347-5;Q86UP8-3;Q86UP8;Q6EKJ0	P78347-2;P78347-4;P78347-3;P78347	11	15	15.2				11	11	15.2	15.2	107.97	0	38.809	872910000	1.72643	1.57405	1.57227	1.60209	1.68084	1.72701	1.51814	1.64347	2.26255	2.85678	1.77348
CLASP2;CLASP1	CLIP-associating protein 2;CLIP-associating protein 1	0.106732	-0.0241537	0.983397	O75122;O75122-3;Q7Z460-2;Q7Z460-4;Q7Z460-5;Q7Z460-3;Q7Z460	O75122;O75122-3;Q7Z460-2;Q7Z460-4;Q7Z460-5;Q7Z460-3;Q7Z460	2	3	3				2	2	3	3	141.13	0	7.437	128500000	-0.938408	-0.583946	-0.874142	-0.825031	-0.78578	-0.744339	-0.867811	-0.726982	0.259437	0.856024	-1.02448
TELO2	Telomere length regulation protein TEL2 homolog	0.138949	-0.0246205	0.983079	Q9Y4R8	Q9Y4R8	5	7	7.9				5	5	7.9	7.9	91.746	0	7.0353	362370000	0.321768	0.409216	0.165993	0.16283	0.300402	0.347574	0.211086	0.299227	0.158187	-2.72603	-1.09725
TTN	Titin	0.16558	-0.0249267	0.982871	Q8WZ42-5;Q8WZ42-11;Q8WZ42-4;Q8WZ42-7;Q8WZ42-2;Q8WZ42;Q8WZ42-8;Q8WZ42-13;Q8WZ42-12;Q8WZ42-6;Q8WZ42-3;Q8WZ42-10;Q8WZ42-9	Q8WZ42-5;Q8WZ42-11;Q8WZ42-4;Q8WZ42-7;Q8WZ42-2;Q8WZ42;Q8WZ42-8;Q8WZ42-13;Q8WZ42-12;Q8WZ42-6;Q8WZ42-3;Q8WZ42-10;Q8WZ42-9	2	1	0.1				2	2	0.1	0.1	3653	0.0034965	1.3511	95344000	-3.40017	-3.22177	-3.38831	-3.30823	-3.20819	-3.26686	-3.3604	-3.38332	NaN	NaN	-4.91923
TNPO1	Transportin-1	0.175399	-0.0250502	0.982786	Q92973-2;Q92973;Q92973-3;O14787-2;O14787	Q92973-2;Q92973;Q92973-3	9	15	14				9	9	14	14	101.31	0	47.499	2352400000	2.19591	2.16665	2.03247	2.10063	2.10492	2.22161	2.05264	2.21669	3.05232	4.19537	1.26177
RDH14	Retinol dehydrogenase 14	0.163541	-0.0251579	0.982713	Q9HBH5	Q9HBH5	6	7	28.9				6	6	28.9	28.9	36.864	0	23.448	302040000	0.304592	0.226027	0.138323	0.15893	0.243765	0.318171	0.102707	0.263861	-0.644931	-3.18474	-0.932271
PGAM5	Serine/threonine-protein phosphatase PGAM5, mitochondrial	0.159771	-0.0252872	0.982625	Q96HS1-2;Q96HS1	Q96HS1-2;Q96HS1	5	9	32.2				5	5	32.2	32.2	28.02	0	7.0735	477900000	0.59874	0.547844	0.512201	0.55658	0.604315	0.704409	0.42329	0.584499	-0.524036	0.354606	0.896134
HNRNPL	Heterogeneous nuclear ribonucleoprotein L	0.111376	-0.0259905	0.982146	P14866;P14866-2	P14866;P14866-2	5	5	11.4				5	5	11.4	11.4	64.132	0	7.1232	219980000	-0.0151482	-0.0376797	0.145861	-0.0954475	-0.127178	-0.056736	0.137447	0.148014	0.119744	-2.27414	0.847066
RPL29	60S ribosomal protein L29	0.120476	-0.0266519	0.981696	P47914	P47914	3	3	20.8				3	3	20.8	20.8	17.752	0	2.7295	1181700000	1.60032	1.50463	1.60944	1.38255	1.38956	1.57521	1.69768	1.54109	2.54534	2.86532	2.68438
CCT8	T-complex protein 1 subunit theta	0.245754	-0.0267797	0.981609	P50990;P50990-2;P50990-3	P50990;P50990-2;P50990-3	23	42	45.8				24	24	45.8	43.1	59.62	0	155.88	4306900000	3.48754	3.46417	3.55859	3.55683	3.49716	3.46892	3.63194	3.57623	2.8312	2.38441	3.782
HSP90AB1	Heat shock protein HSP 90-beta	0.182632	-0.0268483	0.981562	P08238;Q58FF7;Q58FF8	P08238	27	103	58.4				40	40	58.4	41.7	83.263	0	321.44	29005000000	5.83513	5.96687	5.72971	5.76611	5.79875	5.87741	5.82565	5.90342	5.74346	5.78202	5.79241
RPS18	40S ribosomal protein S18	0.154867	-0.0270343	0.981436	P62269	P62269	13	31	59.9				13	13	59.9	59.9	17.718	0	60.265	12616000000	4.59821	4.59458	4.64747	4.49665	4.69761	4.7208	4.47422	4.55241	3.25686	3.77067	4.78246
TKT	Transketolase	0.0358626	-0.0271177	0.981379	P29401;P29401-2	P29401;P29401-2	5	9	9.3				5	5	9.3	9.3	67.877	0	9.9495	238130000	0.670641	0.437632	1.50572	1.12324	0.802299	0.770838	1.23228	1.04028	1.26484	-1.79597	2.73884
VDAC2	Voltage-dependent anion-selective channel protein 2	0.0703649	-0.0275788	0.981065	P45880-2;P45880;P45880-1	P45880-2;P45880;P45880-1	14	40	61.8				14	14	61.8	61.8	30.412	0	131.02	10652000000	4.28505	4.4108	3.91498	3.88058	4.06532	4.24287	4.08147	4.21208	3.58457	4.6459	2.71079
MRPL12	39S ribosomal protein L12, mitochondrial	0.190065	-0.027844	0.980885	P52815	P52815	2	4	11.6				2	2	11.6	11.6	21.348	0	3.553	94091000	-1.28009	-1.19154	-1.21268	-1.33713	-1.29218	-1.20235	-1.10546	-1.31007	NaN	NaN	-0.573941
XPO5	Exportin-5	0.13287	-0.027926	0.980829	Q9HAV4	Q9HAV4	14	23	15.6				14	14	15.6	15.6	136.31	0	165.36	1294500000	2.22953	2.10371	2.01225	2.29189	2.11501	2.30571	2.10206	2.22631	1.05487	-0.313105	1.3288
PPP2R2A	Serine/threonine-protein phosphatase 2A 55 kDa regulatory subunit B alpha isoform	0.0677626	-0.028038	0.980753	P63151;P63151-2;Q9Y2T4-3;Q00005-6;Q9Y2T4-4;Q00005;Q00005-2;Q9Y2T4-2;Q9Y2T4;Q00005-3;Q00005-4;Q00005-5;Q00005-7	P63151;P63151-2	9	18	40				13	13	40	26.2	51.691	0	44.777	1819700000	2.88522	3.33937	2.76759	2.78987	3.01692	3.12412	2.83679	2.91636	2.70598	0.129092	1.50735
CUL4B	Cullin-4B	0.152356	-0.0281839	0.980654	Q13620-3;Q13620-1;Q13620	Q13620-3;Q13620-1;Q13620	4	5	8.2				5	5	8.2	6.8	84.016	0	4.6625	270010000	0.0407753	-0.0861359	-0.171734	-0.136999	-0.0977077	0.079071	-0.174664	-0.0480576	-1.98033	-1.21576	-1.107
KIF11	Kinesin-like protein KIF11	0.145357	-0.0282383	0.980617	P52732	P52732	3	3	3				3	3	3	3	119.16	0	3.0158	112520000	-1.33967	-1.19869	-1.30943	-1.19994	-1.0793	-1.17725	-1.34769	-1.33054	NaN	-1.65932	-1.57001
CPSF6	Cleavage and polyadenylation specificity factor subunit 6	0.103136	-0.0293746	0.979845	Q16630-3;Q16630;Q16630-2	Q16630-3;Q16630;Q16630-2	2	2	4.8				2	2	4.8	4.8	52.325	0	16.516	75954000	-3.98437	-4.03818	-3.96747	-3.67351	-3.87738	-3.72584	-3.89944	-4.04338	-2.23925	-3.28562	-2.54826
TANC2	Protein TANC2	0.344369	-0.0306754	0.978962	Q9HCD6;Q9HCD6-2;Q9HCD6-3;Q9HCD6-4	Q9HCD6;Q9HCD6-2;Q9HCD6-3;Q9HCD6-4	2	1	1.2				2	2	1.2	1.2	219.65	0.0028129	1.3879	111660000	-0.283657	-0.379742	-0.37068	-0.309776	-0.282337	-0.315586	-0.383198	-0.240032	0.499028	NaN	0.562266
FASTKD5	FAST kinase domain-containing protein 5	0.106626	-0.0308156	0.978867	Q7L8L6	Q7L8L6	2	2	3.5				2	2	3.5	3.5	86.573	0	1.7943	21067000	-4.22721	-4.50049	-4.36195	-4.01074	-4.19532	-4.22042	-4.29273	-4.26865	NaN	-2.156	-4.13323
QIL1	Protein QIL1	0.115417	-0.0311031	0.978672	Q5XKP0	Q5XKP0	4	7	53.4				4	4	53.4	53.4	13.087	0	5.897	790790000	0.765453	0.914906	0.589876	0.523397	0.684725	0.827597	0.620623	0.785101	-0.36569	-0.986558	-0.288705
GAK	Cyclin-G-associated kinase	0.122925	-0.0312557	0.978568	O14976-2;O14976	O14976-2;O14976	2	4	2.4				2	2	2.4	2.4	134.46	0	35.336	13522000	-2.97358	-3.13886	-3.05358	-2.76239	-2.8592	-2.86973	-3.05325	-3.02119	-4.01932	-4.33329	-3.84772
PLIN3	Perilipin-3	0.156432	-0.0314941	0.978406	O60664-4;O60664-3;O60664;O60664-2	O60664-4;O60664-3;O60664;O60664-2	2	3	7.6				2	2	7.6	7.6	45.803	0	5.86	23643000	-3.08997	-3.0165	-3.2291	-3.11242	-3.02818	-2.92709	-3.20335	-3.16339	NaN	-0.0118027	-3.39941
EMC7	ER membrane protein complex subunit 7	0.158029	-0.0318427	0.97817	Q9NPA0	Q9NPA0	2	2	12				2	2	12	12	26.47	0	4.1725	130370000	-0.844837	-0.646326	-0.83585	-0.696135	-0.597301	-0.686781	-0.88044	-0.731255	0.843451	NaN	-0.657495
CCT5	T-complex protein 1 subunit epsilon	0.111995	-0.0320368	0.978039	P48643-2;P48643	P48643-2;P48643	12	22	27.9				12	12	27.9	27.9	49.526	0	22.03	2611500000	3.03722	3.01964	3.46765	3.13152	3.22623	3.18269	3.22913	3.14613	3.35728	3.2164	3.45756
SLC25A22	Mitochondrial glutamate carrier 1	0.24555	-0.0329061	0.977449	Q9H936;Q9H1K4	Q9H936	4	6	12.1				4	4	12.1	12.1	34.47	0	25.685	418380000	0.596382	0.573811	0.525711	0.569077	0.603785	0.68479	0.450085	0.657946	-1.21388	NaN	-0.233914
CNOT3	CCR4-NOT transcription complex subunit 3	0.125076	-0.0331497	0.977284	O75175;O75175-2;O75175-3	O75175;O75175-2;O75175-3	2	2	2.8				2	2	2.8	2.8	81.871	0	2.9868	15961000	-3.78988	-3.77399	-4.01991	-3.64206	-3.65545	-3.68245	-3.86389	-3.89146	-3.76204	-2.47834	-3.58282
MBNL1	Muscleblind-like protein 1	0.114471	-0.0336318	0.976958	Q9NR56-3;Q9NR56-4;Q9NR56-7;Q9NR56-6;Q9NR56-2;Q9NR56-5;Q9NR56	Q9NR56-3;Q9NR56-4;Q9NR56-7;Q9NR56-6;Q9NR56-2;Q9NR56-5;Q9NR56	2	3	7.3				2	2	7.3	7.3	33.05	0	3.4845	149150000	-2.21282	-1.87011	-2.13967	-2.37191	-2.1985	-2.11621	-2.09044	-2.05483	-1.86234	-3.14091	-1.60682
RBM4;RBM4B	RNA-binding protein 4;RNA-binding protein 4B	0.303956	-0.0337706	0.976864	Q9BWF3;Q9BQ04;Q9BWF3-3;Q9BWF3-4;Q9BWF3-2	Q9BWF3;Q9BQ04	4	15	26.1				8	8	26.1	13.5	40.313	0	54.877	1015100000	1.97653	2.00782	1.93934	1.84292	1.9131	2.04299	1.93861	2.00699	2.64198	1.40368	1.73294
MAP7D1	MAP7 domain-containing protein 1	0.173179	-0.0340686	0.976662	Q3KQU3-2;Q3KQU3-4;Q3KQU3;Q3KQU3-3	Q3KQU3-2;Q3KQU3-4;Q3KQU3	3	4	4.1				3	3	4.1	4.1	88.725	0	5.2414	60773000	-1.31387	-1.22718	-1.50672	-1.37936	-1.34433	-1.19226	-1.42684	-1.32743	-1.7624	-1.94058	-1.09103
KIF5B	Kinesin-1 heavy chain	0.163104	-0.0343962	0.97644	P33176	P33176	14	24	23.2				14	14	23.2	23.2	109.68	0	92.327	928160000	1.42843	1.42695	1.37739	1.68209	1.56515	1.60665	1.42645	1.45422	1.14597	2.41529	1.57545
PSME3	Proteasome activator complex subunit 3	0.309232	-0.0354424	0.975733	P61289;P61289-2;P61289-3	P61289;P61289-2;P61289-3	7	17	39				7	7	39	39	29.506	0	24.316	727060000	1.63441	1.80373	1.71204	1.77015	1.75308	1.7592	1.7004	1.84942	1.62191	1.33653	2.80377
RFC1	Replication factor C subunit 1	0.138601	-0.0359392	0.975397	P35251-2;P35251	P35251-2;P35251	2	2	3				2	2	3	3	128.18	0	3.1746	64353000	-2.92988	-2.65845	-2.9472	-2.61603	-2.72463	-2.72595	-2.88083	-2.67638	-2.59282	NaN	-2.57227
MRPS7	28S ribosomal protein S7, mitochondrial	0.56243	-0.0363078	0.975147	Q9Y2R9	Q9Y2R9	2	2	10.7				2	2	10.7	10.7	28.134	0	5.25	61487000	-2.29735	-2.38798	-2.27824	-2.36793	-2.28372	-2.27528	-2.28916	-2.3381	-0.821157	0.107686	-2.04237
SEC63	Translocation protein SEC63 homolog	0.149675	-0.0364265	0.975067	Q9UGP8	Q9UGP8	6	7	10.7				6	6	10.7	10.7	87.996	0	10.531	374510000	0.0279694	0.125172	0.0282021	-0.0994473	0.0920143	0.248823	-0.140957	0.0277214	-6.63876	-2.3246	-0.00572491
PEF1	Peflin	0.337353	-0.0366502	0.974916	Q9UBV8	Q9UBV8	5	7	21.1				5	5	21.1	21.1	30.381	0	36.118	1202000000	0.900843	0.870613	0.805258	0.787489	0.828424	0.987898	0.826807	0.867674	0.579614	1.68684	-0.441665
RFC5	Replication factor C subunit 5	0.20104	-0.036725	0.974865	P40937;P40937-2	P40937;P40937-2	3	3	12.6				3	3	12.6	12.6	38.496	0	4.5071	70359000	-1.3492	-1.10123	-1.39566	-1.40212	-1.27646	-1.27814	-1.24404	-1.30268	-1.44231	NaN	-0.705646
NDUFA5	NADH dehydrogenase [ubiquinone] 1 alpha subcomplex subunit 5	0.260299	-0.0368214	0.9748	Q16718;Q16718-2	Q16718;Q16718-2	3	4	44.8				3	3	44.8	44.8	13.459	0	8.6099	453250000	-0.209555	-0.261215	-0.20145	-0.121454	-0.0815163	-0.0742989	-0.279709	-0.210865	-0.0644341	-0.71544	-0.230252
RDH11	Retinol dehydrogenase 11	0.151519	-0.0373797	0.974423	Q8TC12-3;Q8TC12-2;Q8TC12	Q8TC12-3;Q8TC12-2;Q8TC12	2	4	9.7				2	2	9.7	9.7	27.402	0	7.3752	185470000	-0.535879	-0.332888	-0.584938	-0.441151	-0.274771	-0.348629	-0.609329	-0.512608	-0.0433235	-1.36458	-1.07349
SLC2A1	Solute carrier family 2, facilitated glucose transporter member 1	0.0745151	-0.0375733	0.974292	P11166	P11166	2	3	6.9				2	2	6.9	6.9	54.083	0	3.2346	64962000	-3.01855	-2.60381	-3.35492	-3.25515	-3.03583	-2.83516	-3.17184	-3.0393	NaN	NaN	-3.62416
GNL3	Guanine nucleotide-binding protein-like 3	0.598519	-0.0375829	0.974286	Q9BVP2-2;Q9BVP2	Q9BVP2-2;Q9BVP2	6	9	14.2				6	6	14.2	14.2	60.54	0	13.553	365170000	0.7197	0.588255	0.637671	0.608906	0.692497	0.660904	0.681252	0.67021	1.19348	-3.02079	1.28801
SH3GLB1	Endophilin-B1	0.33678	-0.0376148	0.974264	Q9Y371-2;Q9Y371;Q9Y371-3	Q9Y371-2;Q9Y371	8	17	26.7				9	9	26.7	24.6	43.196	0	19.581	1018100000	1.77718	1.72995	1.61529	1.73567	1.79083	1.79167	1.65497	1.77108	1.3387	1.2489	1.4657
CCNB1	G2/mitotic-specific cyclin-B1	0.047973	-0.0376649	0.974231	P14635-2;P14635	P14635-2;P14635	2	3	6.1				2	2	6.1	6.1	44.102	0	2.2341	79117000	-0.245926	-1.16119	-0.112879	0.0259838	-0.374758	-0.48315	-0.225306	-0.260139	0.674073	1.62761	-1.15863
DNAJA1	DnaJ homolog subfamily A member 1	0.240856	-0.0385132	0.973658	P31689;P31689-2	P31689;P31689-2	9	16	28				9	9	28	28	44.868	0	34.638	1740300000	3.16334	3.06838	3.00215	3.16537	3.204	3.19878	2.98668	3.16384	3.00609	-0.681657	2.35454
RALA;RALB	Ras-related protein Ral-A;Ras-related protein Ral-B	0.138512	-0.0385423	0.973638	P11233;P11234;P11234-3;P11234-2	P11233;P11234;P11234-3;P11234-2	2	2	12.1				2	2	12.1	12.1	23.567	0	2.4166	14983000	-0.668098	-0.879038	-0.56258	-0.475855	-0.531704	-0.50876	-0.770967	-0.61997	-1.94441	NaN	-0.767701
PSMD9	26S proteasome non-ATPase regulatory subunit 9	0.150703	-0.0393367	0.973102	O00233-2;O00233	O00233-2;O00233	3	4	22.5				3	3	22.5	22.5	22.764	0	3.7362	138490000	-1.0599	-0.735634	-1.11348	-1.11543	-0.993507	-0.853653	-0.974642	-1.04529	0.669498	-2.56522	-1.88045
TFAM	Transcription factor A, mitochondrial	0.168897	-0.0393381	0.973101	Q00059;Q00059-2	Q00059;Q00059-2	4	4	17.5				4	4	17.5	17.5	29.096	0	5.1477	154290000	-1.21589	-1.02623	-0.985006	-1.24755	-1.2435	-1.02246	-0.958267	-1.09309	-0.829973	-0.407086	-0.807858
HSPA9	Stress-70 protein, mitochondrial	0.376737	-0.0394869	0.973001	P38646	P38646	27	80	46.4				27	27	46.4	46.4	73.68	0	293.33	14462000000	5.02369	5.10006	4.98826	4.98074	4.98547	5.1519	5.02462	5.0887	4.58452	5.0384	3.90474
RPL10	60S ribosomal protein L10	0.600422	-0.0397549	0.97282	P27635;Q96L21	P27635	9	28	42.5				9	9	42.5	42.5	24.604	0	100.99	3387400000	3.6962	3.74991	3.66919	3.68313	3.78036	3.7809	3.67362	3.72256	3.38874	2.80342	4.39602
ALG1	Chitobiosyldiphosphodolichol beta-mannosyltransferase	0.21488	-0.0402455	0.972489	Q9BT22-2;Q9BT22	Q9BT22-2;Q9BT22	3	4	8.8				3	3	8.8	8.8	40.337	0	3.0883	351780000	0.721584	0.684818	0.426622	0.562458	0.656075	0.717855	0.555529	0.627007	0.549099	-0.998961	-0.0778284
LANCL1	LanC-like protein 1	0.128328	-0.0404077	0.97238	O43813	O43813	2	3	6.3				2	2	6.3	6.3	45.283	0	1.909	25690000	-3.19262	-3.23453	-3.27824	-3.22789	-3.09309	-2.91484	-3.43352	-3.3302	-3.49784	NaN	-4.9409
LARS	Leucine--tRNA ligase, cytoplasmic	0.296409	-0.040597	0.972253	Q9P2J5;Q9P2J5-2;Q9P2J5-3	Q9P2J5;Q9P2J5-2;Q9P2J5-3	5	6	5.4				5	5	5.4	5.4	134.46	0	23.275	188150000	-0.729622	-0.569008	-0.80743	-0.715996	-0.666792	-0.583889	-0.706873	-0.702114	0.618507	1.99617	-0.0501204
CNP	2,3-cyclic-nucleotide 3-phosphodiesterase	0.217821	-0.0406308	0.97223	P09543-2;P09543	P09543-2;P09543	4	5	14				4	4	14	14	45.098	0	4.2004	168360000	-0.975363	-0.752634	-0.954893	-1.08424	-0.958815	-0.824417	-0.909792	-0.911581	0.0253067	-1.54838	-1.15081
MDN1	Midasin	0.209641	-0.0420427	0.971279	Q9NU22	Q9NU22	7	9	1.6				7	7	1.6	1.6	632.81	0	91.629	202690000	0.336601	0.134447	0.246508	0.341356	0.197859	0.434225	0.198116	0.396883	1.33471	-2.28856	-0.210622
RAB21	Ras-related protein Rab-21	0.218912	-0.0425401	0.970944	Q9UL25	Q9UL25	4	5	24.4				4	4	24.4	24.4	24.347	0	22.093	120540000	-1.61969	-1.71722	-1.65087	-1.62008	-1.49169	-1.47033	-1.74299	-1.73269	-4.06885	-1.99724	-1.74038
RANBP1	Ran-specific GTPase-activating protein	0.0687595	-0.0429211	0.970688	P43487-2;P43487	P43487-2;P43487	2	5	11				2	2	11	11	23.239	0	3.8851	352920000	-0.63986	-0.671761	0.0472546	-0.384537	-0.52914	-0.673906	0.00123405	-0.275406	0.121631	-2.6639	0.902925
CISD2	CDGSH iron-sulfur domain-containing protein 2	0.248587	-0.0433135	0.970424	Q8N5K1	Q8N5K1	3	3	20.7				3	3	20.7	20.7	15.278	0	2.1845	30058000	-0.889212	-0.846176	-1.07602	-0.86418	-0.785316	-0.886339	-1.00254	-0.828135	1.10072	2.2438	-0.402562
UBA1	Ubiquitin-like modifier-activating enzyme 1	0.134754	-0.0437193	0.970151	P22314-2;P22314	P22314-2;P22314	11	20	14.9				11	11	14.9	14.9	113.8	0	72.484	752570000	1.81432	1.74792	2.1515	1.96508	1.82673	1.8389	2.18107	2.00699	1.55774	3.09961	2.962
NUP210	Nuclear pore membrane glycoprotein 210	0.180653	-0.0439749	0.969979	Q8TEM1;Q8TEM1-2	Q8TEM1	5	6	3.3				5	5	3.3	3.3	205.11	0	36.814	90477000	-1.11377	-0.930025	-1.26963	-1.0858	-0.955683	-0.955622	-1.22694	-1.08509	-0.922892	-1.65936	-1.58532
RAB7A	Ras-related protein Rab-7a	0.249359	-0.0440912	0.969901	P51149	P51149	7	16	34.8				7	7	34.8	34.8	23.489	0	25.982	2549000000	2.78496	2.78196	2.776	2.88062	2.95183	2.96353	2.67752	2.80704	2.74406	2.63696	2.24092
RPL30	60S ribosomal protein L30	0.923725	-0.0441175	0.969883	P62888	P62888	6	13	50.4				6	6	50.4	50.4	12.784	0	18.308	2062200000	2.69269	2.68907	2.63592	2.68264	2.75338	2.75256	2.67095	2.6999	2.2351	1.5182	3.09351
LTN1	E3 ubiquitin-protein ligase listerin	0.218336	-0.0442948	0.969764	O94822-3;O94822;O94822-2	O94822-3;O94822	3	4	2.6				3	3	2.6	2.6	205.17	0	46.713	131130000	-0.991856	-0.928778	-1.15418	-1.08016	-0.966568	-0.857338	-1.1678	-0.986097	-1.36575	-1.17021	-1.81186
SMC1A	Structural maintenance of chromosomes protein 1A	0.340961	-0.0443263	0.969743	Q14683	Q14683	6	8	6.3				6	6	6.3	6.3	143.23	0	11.498	277130000	-0.0831051	-0.332146	-0.184223	-0.174278	-0.202023	-0.161591	-0.106316	-0.126518	-0.620841	-3.78436	0.301311
TMEM115	Transmembrane protein 115	0.143408	-0.0450411	0.969262	Q12893	Q12893	2	3	11.7				2	2	11.7	11.7	38.197	0	3.161	28471000	-3.74323	-3.76827	-3.99012	-3.64638	-3.77122	-3.48334	-3.93866	-3.77462	-6.44119	NaN	-4.27043
SLC25A6	ADP/ATP translocase 3;ADP/ATP translocase 3, N-terminally processed	0.181489	-0.0453086	0.969083	P12236	P12236	4	20	62.4				22	10	34.9	13.8	32.866	0	123.67	5281400000	3.67924	3.78496	3.4756	3.48845	3.65095	3.76233	3.48018	3.71603	2.07694	0.959666	2.09933
HUWE1	E3 ubiquitin-protein ligase HUWE1	0.314187	-0.0464849	0.968293	Q7Z6Z7-2;Q7Z6Z7-3;Q7Z6Z7	Q7Z6Z7-2;Q7Z6Z7-3;Q7Z6Z7	2	3	0.6				2	2	0.6	0.6	480.19	0	2.7553	68824000	-2.4294	-2.33578	-2.51552	-2.61614	-2.41826	-2.39892	-2.47998	-2.41373	NaN	-1.81624	-2.0945
PPP5C	Serine/threonine-protein phosphatase 5	0.211385	-0.0465336	0.96826	P53041	P53041	2	3	4.8				2	2	4.8	4.8	56.878	0	3.0477	43361000	-3.29537	-2.99181	-3.19843	-3.29817	-3.29513	-3.13528	-3.09159	-3.07565	-4.42404	-2.3643	-2.09214
PRPF6	Pre-mRNA-processing factor 6	0.564112	-0.0468087	0.968075	O94906-2;O94906	O94906-2;O94906	3	5	3.6				3	3	3.6	3.6	102.43	0	5.7895	97695000	-1.52851	-1.3863	-1.55184	-1.44443	-1.44826	-1.41897	-1.42334	-1.43328	-3.38947	-0.939217	-0.835509
TCOF1	Treacle protein	0.335558	-0.0477099	0.967471	Q13428-2;Q13428-8;Q13428-6;Q13428-7;Q13428;Q13428-3;Q13428-4	Q13428-2;Q13428-8;Q13428-6;Q13428-7;Q13428;Q13428-3;Q13428-4	2	3	1.4				2	2	1.4	1.4	144.31	0	2.755	49349000	-3.11706	-3.03974	-2.99675	-2.93647	-3.06312	-3.04586	-2.92117	-2.86903	-4.9075	NaN	-2.10407
KARS	Lysine--tRNA ligase	0.592251	-0.0479064	0.967339	Q15046;Q15046-2	Q15046;Q15046-2	6	8	13.1				7	7	13.1	10.4	68.047	0	4.0923	245700000	0.68881	0.538092	0.594625	0.626545	0.72357	0.630302	0.637121	0.648705	0.319596	0.0437527	0.981532
RAB6A;RAB6B	Ras-related protein Rab-6A;Ras-related protein Rab-6B	0.130629	-0.0481467	0.967178	P20340-2;P20340;P20340-4;Q9NRW1-2;Q9NRW1;P20340-3	P20340-2;P20340;P20340-4;Q9NRW1-2;Q9NRW1	5	18	40.4				6	6	40.4	35.1	23.548	0	12.895	2106800000	2.1388	2.16006	2.33212	2.3821	2.60732	2.40006	2.12048	2.07781	1.89343	0.857458	1.72563
HOOK3	Protein Hook homolog 3	0.167205	-0.0482988	0.967076	Q86VS8	Q86VS8	2	2	4.3				2	2	4.3	4.3	83.125	0	3.8352	28285000	-3.18031	-2.97071	-3.18475	-3.38206	-3.02765	-3.00986	-3.32802	-3.1591	-2.00545	-1.10419	-2.75902
HECTD1	E3 ubiquitin-protein ligase HECTD1	0.285003	-0.0483747	0.967025	Q9ULT8	Q9ULT8	3	4	1.5				3	3	1.5	1.5	289.38	0	4.751	79943000	-2.65773	-2.59746	-2.60763	-2.3641	-2.51507	-2.43862	-2.56594	-2.5138	-3.46307	-3.36325	-2.56719
STT3A	Dolichyl-diphosphooligosaccharide--protein glycosyltransferase subunit STT3A	0.218198	-0.0486999	0.966807	P46977;P46977-2	P46977;P46977-2	5	9	8.4				5	5	8.4	8.4	80.529	0	8.5126	508460000	0.975433	1.07427	0.832008	0.785847	1.01689	1.09134	0.810202	0.943926	-1.86163	-1.27924	-0.0989065
OSBPL3	Oxysterol-binding protein-related protein 3	0.35403	-0.0487809	0.966753	Q9H4L5-4;Q9H4L5-3;Q9H4L5-2;Q9H4L5;Q9H4L5-8;Q9H4L5-7;Q9H4L5-6;Q9H4L5-5	Q9H4L5-4;Q9H4L5-3;Q9H4L5-2;Q9H4L5;Q9H4L5-8;Q9H4L5-7;Q9H4L5-6;Q9H4L5-5	2	1	3.7				2	2	3.7	3.7	93.787	0	2.6884	15799000	-4.34127	-4.14638	-4.23883	-4.2558	-4.30222	-4.17807	-4.0906	-4.21626	NaN	NaN	-3.85572
SEC22B	Vesicle-trafficking protein SEC22b	0.406182	-0.0489044	0.96667	O75396	O75396	5	10	32.6				5	5	32.6	32.6	24.593	0	40.997	535520000	0.492935	0.333914	0.476854	0.536926	0.595873	0.472404	0.468203	0.499767	0.210191	0.125838	0.656394
PSMD11	26S proteasome non-ATPase regulatory subunit 11	0.180908	-0.0491886	0.96648	O00231;O00231-2	O00231;O00231-2	6	13	17.1				6	6	17.1	17.1	47.463	0	16.135	848630000	1.39122	1.74917	1.3375	1.29078	1.43456	1.51858	1.50653	1.50575	0.833151	-2.37185	2.01604
TIMM44	Mitochondrial import inner membrane translocase subunit TIM44	0.509627	-0.0493169	0.966394	O43615	O43615	2	4	5.5				2	2	5.5	5.5	51.355	0	3.5054	134370000	-1.71631	-1.64827	-1.78506	-1.69229	-1.57767	-1.74101	-1.67907	-1.64692	-1.73861	-2.80511	-1.36132
TXN	Thioredoxin	0.507227	-0.0494537	0.966302	P10599;P10599-2	P10599;P10599-2	7	10	88.6				7	7	88.6	88.6	11.737	0	63.999	1976700000	2.38319	2.40791	2.359	2.29881	2.31519	2.50063	2.40609	2.42482	1.26977	-2.4687	1.80241
SLFN11	Schlafen family member 11	0.857892	-0.0497479	0.966105	Q7Z7L1	Q7Z7L1	2	2	2.2				2	2	2.2	2.2	102.83	0	2.728	45555000	-3.00842	-2.98666	-3.09149	-3.06558	-2.9643	-2.99119	-3.03242	-2.96526	-2.53426	-4.04698	-3.74928
PRDX5	Peroxiredoxin-5, mitochondrial	0.264224	-0.0501428	0.965841	P30044-2;P30044;P30044-4;P30044-3	P30044-2;P30044;P30044-4;P30044-3	3	6	40.7				3	3	40.7	40.7	17.031	0	16.388	301340000	-0.256676	-0.053154	-0.0934963	-0.0675259	-0.128353	0.0987835	-0.1894	-0.0513115	0.551811	-3.04258	-1.01661
TRIM21	E3 ubiquitin-protein ligase TRIM21	0.227327	-0.050446	0.965638	P19474;P19474-2	P19474;P19474-2	16	33	39.2				16	16	39.2	39.2	54.169	0	97.787	10316000000	3.99022	4.2478	4.03954	4.06798	4.29832	4.19845	3.98642	4.06413	4.04062	3.82839	5.25614
MRPS31	28S ribosomal protein S31, mitochondrial	0.310341	-0.0505986	0.965536	Q92665	Q92665	2	3	6.6				2	2	6.6	6.6	45.318	0	3.2672	55474000	-1.7037	-1.67799	-1.73153	-1.72024	-1.51662	-1.58023	-1.71601	-1.81821	-1.53234	-0.285521	-1.73652
GEMIN4	Gem-associated protein 4	0.205783	-0.0516949	0.964802	P57678	P57678	6	10	5.4				6	6	5.4	5.4	120.04	0	11.698	386040000	0.157692	0.347462	0.0423679	0.04669	0.176702	0.323545	0.0139694	0.286774	-1.57735	0.789575	-0.0204897
RPL15	60S ribosomal protein L15	0.299546	-0.0517845	0.964742	P61313;P61313-2	P61313	7	12	33.8				7	7	33.8	33.8	24.146	0	8.9003	2528100000	2.06649	1.83426	2.14091	2.12589	2.1191	2.10762	2.05365	2.09432	2.49265	0.397367	2.80395
NUP214	Nuclear pore complex protein Nup214	0.405915	-0.0518947	0.964669	P35658-2;P35658-4;P35658;P35658-3;P35658-5	P35658-2;P35658-4;P35658;P35658-3;P35658-5	2	2	1.6				2	2	1.6	1.6	212.57	0	4.3868	61197000	-2.15056	-2.08597	-2.00816	-2.18184	-2.04384	-1.94253	-2.1243	-2.10828	NaN	NaN	-1.63866
DEGS1	Sphingolipid delta(4)-desaturase DES1	0.269861	-0.0519328	0.964643	O15121	O15121	5	16	18.6				5	5	18.6	18.6	37.866	0	40.033	2141500000	2.57136	2.54549	2.44019	2.6931	2.66373	2.71266	2.44003	2.64145	1.90606	1.35306	-0.32381
GSPT1;GSPT2	Eukaryotic peptide chain release factor GTP-binding subunit ERF3A;Eukaryotic peptide chain release factor GTP-binding subunit ERF3B	0.326572	-0.052125	0.964515	P15170;P15170-2;P15170-3;Q8IYD1	P15170;P15170-2;P15170-3;Q8IYD1	2	3	3.8				2	2	3.8	3.8	55.755	0	2.2889	153220000	-0.553923	-0.601624	-0.404373	-0.459021	-0.537701	-0.496597	-0.305138	-0.471004	0.529158	NaN	0.748528
KPNA2	Importin subunit alpha-1	0.101155	-0.0529361	0.963973	P52292	P52292	5	5	13.4				5	5	13.4	13.4	57.861	0	11.071	729170000	0.877396	0.137426	0.813141	0.940315	0.632822	0.708591	0.815952	0.822657	0.320854	-1.32395	1.50439
ADAR	Double-stranded RNA-specific adenosine deaminase	0.307521	-0.0534387	0.963637	P55265-5;P55265-3;P55265-2;P55265;P55265-4	P55265-5;P55265-3;P55265-2;P55265;P55265-4	6	7	9.9				6	6	9.9	9.9	103.64	0	20.687	467690000	1.17466	1.27977	1.1982	1.00122	1.10505	1.31718	1.20869	1.23669	0.401533	-0.019125	1.00057
MAGED2	Melanoma-associated antigen D2	0.376036	-0.0535102	0.963589	Q9UNF1;Q9UNF1-2	Q9UNF1;Q9UNF1-2	6	9	12.4				6	6	12.4	12.4	64.953	0	21.049	495960000	0.490807	0.656517	0.435818	0.473045	0.616993	0.479448	0.530252	0.643534	0.0364122	-0.178379	0.661208
MIA3	Melanoma inhibitory activity protein 3	0.184965	-0.0535259	0.963578	Q5JRA6;Q5JRA6-2;Q5JRA6-4	Q5JRA6;Q5JRA6-2;Q5JRA6-4	2	2	1.3				2	2	1.3	1.3	213.7	0	2.1443	38879000	-3.50421	-3.50606	-3.55295	-3.13592	-3.27516	-3.26602	-3.48852	-3.45533	-3.98547	-0.232512	-3.0382
HSPD1	60 kDa heat shock protein, mitochondrial	0.313376	-0.053596	0.963532	P10809;P10809-2	P10809	28	95	54.1				28	28	54.1	54.1	61.054	0	323.31	28745000000	6.12942	5.97585	6.10087	6.00836	6.26008	5.95734	6.12396	6.0875	5.32023	2.92986	6.25444
UBE2C	Ubiquitin-conjugating enzyme E2 C	0.230214	-0.0541573	0.963157	O00762-3;O00762-4;O00762;O00762-2	O00762-3;O00762-4;O00762;O00762-2	2	4	12.7				2	2	12.7	12.7	16.676	0	1.9704	126370000	-1.40217	-1.39861	-1.19457	-1.5779	-1.3378	-1.26989	-1.25856	-1.49038	NaN	NaN	-1.23582
RMDN3	Regulator of microtubule dynamics protein 3	0.16005	-0.0542221	0.963114	Q96TC7	Q96TC7	2	2	7.4				2	2	7.4	7.4	52.118	0	5.5485	40961000	-2.22618	-2.13817	-2.58223	-2.47272	-2.27519	-2.14637	-2.52083	-2.26003	-2.58557	-0.229513	-2.45025
SKP1	S-phase kinase-associated protein 1	0.357369	-0.0544114	0.962987	P63208;P63208-2	P63208;P63208-2	4	10	25.8				4	4	25.8	25.8	18.658	0	11.366	444170000	1.649	1.76005	1.53081	1.54824	1.69938	1.76069	1.57353	1.67214	2.05106	-0.427419	1.20802
NONO	Non-POU domain-containing octamer-binding protein	0.190331	-0.0551753	0.962477	Q15233;Q15233-2	Q15233;Q15233-2	12	21	32.1				14	14	32.1	29.9	54.231	0	37.7	2207300000	2.76775	2.60536	3.00234	2.82585	2.81206	2.71994	3.08422	2.80579	3.32359	2.40825	4.26823
HDAC2	Histone deacetylase 2	0.513478	-0.0558109	0.962054	Q92769-3;Q92769	Q92769-3;Q92769	2	9	14.8				6	6	14.8	5.5	51.998	0	9.913	539240000	1.29623	1.35792	1.20745	1.18954	1.35168	1.38606	1.2862	1.25045	2.50493	3.39988	1.33352
STOML2	Stomatin-like protein 2, mitochondrial	0.36177	-0.0562248	0.961778	Q9UJZ1;Q9UJZ1-2	Q9UJZ1;Q9UJZ1-2	10	21	35.4				10	10	35.4	35.4	38.534	0	51.922	1372500000	1.5293	1.57436	1.46677	1.50735	1.719	1.64389	1.45317	1.48662	1.64972	1.4677	1.71622
RABL3	Rab-like protein 3	0.203453	-0.0565295	0.961574	Q5HYI8	Q5HYI8	2	4	13.6				2	2	13.6	13.6	26.422	0	19.671	112410000	-0.426239	-0.595575	-0.490345	-0.341928	-0.26828	-0.233524	-0.643829	-0.482336	0.86004	NaN	-0.0379896
RPS17L;RPS17	40S ribosomal protein S17-like;40S ribosomal protein S17	0.431231	-0.0569792	0.961275	P0CW22;P08708	P0CW22;P08708	11	28	69.6				11	11	69.6	69.6	15.55	0	104.16	4770700000	4.33607	4.25886	4.21495	4.0881	4.23585	4.25203	4.27718	4.36083	4.7315	3.69026	4.48044
RPL7	60S ribosomal protein L7	0.961614	-0.0573196	0.961048	P18124	P18124	11	20	43.5				11	11	43.5	43.5	29.225	0	28.78	7568300000	3.80979	3.67622	3.74558	3.70348	3.77852	3.80295	3.81035	3.77253	3.39701	1.0393	4.17005
TNRC6B	Trinucleotide repeat-containing gene 6B protein	0.181716	-0.0574493	0.960962	Q9UPQ9-1;Q9UPQ9	Q9UPQ9-1;Q9UPQ9	16	51	23.7				25	25	23.7	15.4	182.81	0	304.19	3974500000	3.53887	3.4116	3.42643	3.62148	3.84124	3.63346	3.34701	3.40646	3.1047	1.19625	4.2836
SPTBN1	Spectrin beta chain, non-erythrocytic 1	0.582062	-0.0575004	0.960928	Q01082-3;Q01082-2;Q01082	Q01082-3;Q01082-2;Q01082	3	3	1.8				3	3	1.8	1.8	251.39	0	3.836	54600000	1.25487	1.16989	1.18649	1.23815	1.35662	1.30146	1.15877	1.26255	2.61801	2.48977	2.9566
PUM1	Pumilio homolog 1	1.14351	-0.0577354	0.960771	Q14671-4;Q14671-2;Q14671;Q14671-3;Q8TB72-2;Q8TB72-4;Q8TB72-3;Q8TB72	Q14671-4;Q14671-2;Q14671;Q14671-3	9	16	10.3				9	9	10.3	10.3	119.56	0	23.143	602180000	1.20743	1.17767	1.10747	1.18596	1.25372	1.19845	1.20373	1.25358	0.97839	1.29402	1.02607
RRP1B	Ribosomal RNA processing protein 1 homolog B	0.660767	-0.0586433	0.960167	Q14684-2;Q14684	Q14684-2;Q14684	4	4	6.5				4	4	6.5	6.5	82.175	0	23.029	147770000	-1.12402	-1.30159	-1.1487	-1.21734	-1.17148	-1.14282	-1.14528	-1.0975	-0.82726	-1.98237	-0.740857
YTHDF2	YTH domain-containing family protein 2	0.154732	-0.058723	0.960114	Q9Y5A9;Q9Y5A9-2;Q9BYJ9;Q7Z739	Q9Y5A9;Q9Y5A9-2	4	7	7.8				4	4	7.8	7.8	62.333	0	10.103	325290000	0.500151	0.86347	0.370802	0.28809	0.589025	0.753641	0.438381	0.476357	0.377985	2.51872	0.89008
MYL6	Myosin light polypeptide 6	1.4036	-0.0590134	0.95992	P60660;P60660-2;P14649	P60660;P60660-2	5	10	48.3				5	5	48.3	48.3	16.93	0	24.953	1059900000	2.27908	2.20374	2.30065	2.24941	2.29878	2.32066	2.33765	2.31184	1.42925	-1.5247	2.85857
USP10	Ubiquitin carboxyl-terminal hydrolase 10	0.115439	-0.0590239	0.959913	Q14694;Q14694-3;Q14694-2	Q14694;Q14694-3;Q14694-2	4	3	10.4				5	5	10.4	9.3	87.133	0	4.8527	48560000	-3.06935	-3.12251	-3.19903	-3.06843	-3.36294	-2.92425	-3.35196	-2.58408	-1.29401	-1.61896	-3.22398
SKIV2L	Helicase SKI2W	0.215043	-0.0590453	0.959899	Q15477	Q15477	2	3	1.9				2	2	1.9	1.9	137.75	0.0021962	1.548	17816000	-4.04698	-4.17743	-4.22991	-4.02625	-4.00555	-3.81876	-4.27514	-4.14495	-4.04057	-4.62377	-3.82279
NAT10	N-acetyltransferase 10	0.254479	-0.0590582	0.959891	Q9H0A0-2;Q9H0A0	Q9H0A0-2;Q9H0A0	2	2	2.6				2	2	2.6	2.6	107.3	0	3.0691	36031000	-2.93951	-3.1327	-3.03627	-3.16925	-3.22317	-2.84074	-3.01233	-2.96526	-4.20879	-0.548775	-2.52648
ECM29	Proteasome-associated protein ECM29 homolog	0.384238	-0.059484	0.959607	Q5VYK3	Q5VYK3	12	15	9.2				12	12	9.2	9.2	204.29	0	28.163	528620000	1.90324	1.9584	1.73649	1.86034	1.9791	2.00648	1.78875	1.92208	0.592667	1.025	1.29158
DARS	Aspartate--tRNA ligase, cytoplasmic	0.971532	-0.059588	0.959538	P14868-2;P14868	P14868-2;P14868	9	16	30.2				9	9	30.2	30.2	45.771	0	20.829	994140000	1.28832	1.23437	1.1785	1.16402	1.27929	1.3118	1.26347	1.24899	2.0518	-1.2705	1.64752
SLC25A3	Phosphate carrier protein, mitochondrial	0.211645	-0.0595908	0.959536	Q00325-2;Q00325	Q00325-2;Q00325	10	20	29.6				10	10	29.6	29.6	39.958	0	53.005	9004300000	3.69669	4.00805	3.64134	3.61247	3.83205	3.94371	3.62829	3.79287	3.48105	4.31322	2.58361
CUL5	Cullin-5	0.307165	-0.0597954	0.9594	Q93034	Q93034	2	3	2.8				2	2	2.8	2.8	90.954	0	2.1255	129490000	-1.4469	-1.62961	-1.60788	-1.29692	-1.36621	-1.44868	-1.49174	-1.43551	-0.938196	-7.03775	-1.43116
FAF2	FAS-associated factor 2	0.121404	-0.0602136	0.959122	Q96CS3	Q96CS3	4	5	15.3				4	4	15.3	15.3	52.623	0	23.51	260820000	-0.580511	0.163151	-0.440651	-0.422436	-0.0673065	-0.173582	-0.369179	-0.429525	0.247724	1.77854	-0.400346
HSPA5	78 kDa glucose-regulated protein	0.504277	-0.0603266	0.959047	P11021	P11021	44	139	63.3				46	45	63.3	63.3	72.332	0	323.31	44912000000	6.65668	6.62997	6.54508	6.57781	6.74718	6.7345	6.5402	6.62899	6.12564	3.72768	6.90133
RAVER1	Ribonucleoprotein PTB-binding 1	0.30246	-0.0605602	0.958892	Q8IY67-2;Q8IY67-3;Q8IY67	Q8IY67-2;Q8IY67-3;Q8IY67	2	2	2.2				2	2	2.2	2.2	77.859	0	1.9729	5560900	-1.6233	-1.33277	-1.52312	-1.60441	-1.42303	-1.44349	-1.60741	-1.36743	-0.379704	NaN	-1.72465
TAMM41	Phosphatidate cytidylyltransferase, mitochondrial	0.254226	-0.0606289	0.958846	Q96BW9-2;Q96BW9-3;Q96BW9	Q96BW9-2;Q96BW9-3;Q96BW9	2	2	8.5				2	2	8.5	8.5	35.907	0	4.0075	27717000	-2.98055	-2.73629	-2.98122	-3.09426	-2.79824	-2.78014	-3.04443	-2.927	-8.01321	NaN	-3.61344
HADHB	Trifunctional enzyme subunit beta, mitochondrial;3-ketoacyl-CoA thiolase	0.478282	-0.060853	0.958697	P55084-2;P55084	P55084-2;P55084	4	5	8				4	4	8	8	48.879	0	3.993	622850000	1.07438	1.21332	0.994293	0.988773	1.17506	1.06299	1.12247	1.15366	0.0472231	0.0671644	0.95106
C14orf166	UPF0568 protein C14orf166	0.329574	-0.0609889	0.958607	Q9Y224	Q9Y224	3	3	16.8				3	3	16.8	16.8	28.068	0	12.03	111030000	0.657827	0.341221	0.578817	0.549479	0.62775	0.687971	0.505377	0.550201	-2.21601	NaN	-0.479468
ASPH	Aspartyl/asparaginyl beta-hydroxylase	0.25108	-0.0610404	0.958573	Q12797-10;Q12797	Q12797-10;Q12797	3	4	6				3	3	6	6	83.267	0	9.3919	72176000	-1.55805	-1.31787	-1.66613	-1.59163	-1.34488	-1.43986	-1.65216	-1.45262	-0.69386	-2.22935	-1.79247
AIMP2	Aminoacyl tRNA synthase complex-interacting multifunctional protein 2	0.379831	-0.0612888	0.958408	Q13155	Q13155	5	7	19.1				5	5	19.1	19.1	35.348	0	27.333	286120000	0.245413	0.412516	0.082386	0.171001	0.282299	0.309494	0.280611	0.284067	0.0244484	-0.0032835	0.709069
IPO8	Importin-8	0.39424	-0.061399	0.958334	O15397;O15397-2	O15397;O15397-2	3	4	3.6				3	3	3.6	3.6	119.94	0	4.6403	154000000	-0.558573	-0.482117	-0.716248	-0.646803	-0.446072	-0.533875	-0.663309	-0.514889	-0.563736	-1.32744	-1.07382
OSBPL9	Oxysterol-binding protein-related protein 9	0.454128	-0.0614934	0.958272	Q96SU4-5;Q96SU4-4;Q96SU4-3;Q96SU4-7;Q96SU4-2;Q96SU4;Q96SU4-6	Q96SU4-5;Q96SU4-4;Q96SU4-3;Q96SU4-7;Q96SU4-2;Q96SU4;Q96SU4-6	2	2	3.9				2	2	3.9	3.9	62.528	0.0086795	1.0013	66155000	-0.460812	-0.550957	-0.591909	-0.511898	-0.331423	-0.448645	-0.591051	-0.498484	0.0185146	-0.854232	-0.10045
PPM1B	Protein phosphatase 1B	0.38311	-0.061543	0.958239	O75688-4;O75688-2;O75688;O75688-5	O75688-4;O75688-2;O75688;O75688-5	2	4	12.4				4	4	12.4	6.3	42.086	0	3.2562	175230000	-1.62517	-1.88882	-1.77059	-1.82429	-1.59807	-1.75277	-1.71904	-1.79282	-2.18034	NaN	-2.8853
RAB5C	Ras-related protein Rab-5C	0.446391	-0.0620027	0.957933	P51148;P51148-2	P51148;P51148-2	4	11	45.4				6	6	45.4	35.6	23.482	0	68.492	1399700000	2.36007	2.36648	2.31834	2.5015	2.55567	2.46967	2.32358	2.4455	0.921903	-0.133563	1.51712
ACOT7;ACOT7L	Cytosolic acyl coenzyme A thioester hydrolase;Putative cytosolic acyl coenzyme A thioester hydrolase-like	0.341642	-0.0621696	0.957823	O00154-2;O00154-3;O00154-6;O00154-4;O00154-5;O00154-7;O00154;Q6ZUV0	O00154-2;O00154-3;O00154-6;O00154-4;O00154-5;O00154-7;O00154;Q6ZUV0	2	3	7.7				2	2	7.7	7.7	27.041	0	1.9304	58382000	-1.93513	-1.75714	-1.85195	-2.07846	-1.8066	-1.75554	-1.91805	-1.89381	-0.565026	-0.471787	-1.31016
DDB1	DNA damage-binding protein 1	0.687125	-0.0622678	0.957757	Q16531;Q16531-2	Q16531	7	11	8.2				7	7	8.2	8.2	126.97	0	15.303	630210000	0.922125	0.9	0.947332	0.987032	1.04924	1.07484	0.89679	0.984688	1.97684	2.99584	0.888455
XPOT	Exportin-T	0.248375	-0.0631213	0.957191	O43592	O43592	4	7	7.1				4	4	7.1	7.1	109.96	0	107.09	415160000	0.144276	0.379726	0.0529995	0.315243	0.372282	0.395634	0.0836334	0.29318	-2.13288	-1.67477	-0.209157
VPS18	Vacuolar protein sorting-associated protein 18 homolog	0.174798	-0.0631371	0.957181	Q9P253	Q9P253	2	2	2.2				2	2	2.2	2.2	110.18	0.00074405	1.627	79997000	-3.33929	-3.56621	-3.086	-3.1805	-3.22362	-3.04604	-3.48654	-3.16325	-4.2926	-1.21383	-2.12671
MFF	Mitochondrial fission factor	0.168718	-0.0632157	0.957128	Q9GZY8-5;Q9GZY8-2;Q9GZY8;Q9GZY8-4;Q9GZY8-3	Q9GZY8-5;Q9GZY8-2;Q9GZY8;Q9GZY8-4;Q9GZY8-3	2	2	11.3				2	2	11.3	11.3	27.105	0.0045249	1.1211	29670000	-4.87781	-4.32278	-4.85735	-4.92536	-4.72705	-4.62402	-4.74302	-4.63635	-4.64022	-1.66096	-4.51161
MRPS30	28S ribosomal protein S30, mitochondrial	0.360927	-0.0632963	0.957075	Q9NP92	Q9NP92	2	2	8				2	2	8	8	50.364	0	3.8541	82061000	-1.84974	-1.54529	-1.85892	-1.69621	-1.71498	-1.64958	-1.68249	-1.64992	-3.13065	-2.14441	-1.40196
BCLAF1	Bcl-2-associated transcription factor 1	0.699116	-0.0634894	0.956947	Q9NYF8-2;Q9NYF8;Q9NYF8-3;Q9NYF8-4	Q9NYF8-2;Q9NYF8;Q9NYF8-3;Q9NYF8-4	8	13	9.8				8	8	9.8	9.8	105.95	0	9.2798	832880000	1.32071	1.41392	1.41846	1.24769	1.39065	1.39814	1.4037	1.46225	1.34297	-1.08975	1.86496
SLC3A2	4F2 cell-surface antigen heavy chain	0.63973	-0.0638351	0.956717	P08195-3;P08195;P08195-4;P08195-2	P08195-3;P08195;P08195-4;P08195-2	5	14	15.1				6	6	15.1	12.1	61.815	0	43.194	531080000	1.07044	1.10279	1.00292	1.00996	1.14092	1.17292	0.989182	1.13842	0.303349	-1.35326	0.810786
UBR4	E3 ubiquitin-protein ligase UBR4	0.427947	-0.0638819	0.956686	Q5T4S7-5;Q5T4S7-3;Q5T4S7-4;Q5T4S7;Q5T4S7-2	Q5T4S7-5;Q5T4S7-3;Q5T4S7-4;Q5T4S7;Q5T4S7-2	2	2	1.2				2	2	1.2	1.2	270.74	0	6.4554	53126000	-3.33975	-3.42491	-3.42438	-3.26078	-3.38468	-3.14732	-3.36227	-3.30003	-8.46976	-1.32802	-2.71406
SLC25A19	Mitochondrial thiamine pyrophosphate carrier	0.459549	-0.0640068	0.956604	Q9HC21-2;Q9HC21	Q9HC21-2;Q9HC21	6	12	19.4				6	6	19.4	19.4	29.217	0	6.2192	538260000	0.906837	0.733675	0.773733	0.762304	0.871469	0.942778	0.716074	0.902256	-0.446464	1.00321	-0.275132
HAT1	Histone acetyltransferase type B catalytic subunit	0.438101	-0.0640364	0.956584	O14929;O14929-2	O14929;O14929-2	6	8	14.8				6	6	14.8	14.8	49.512	0	50.602	492830000	-0.360001	-0.505072	-0.541445	-0.578663	-0.516548	-0.307936	-0.465275	-0.439276	-1.13279	-4.02367	-1.55481
IGF2R	Cation-independent mannose-6-phosphate receptor	0.369752	-0.0640922	0.956547	P11717	P11717	15	22	8.4				15	15	8.4	8.4	274.37	0	54.742	996970000	1.00563	1.21233	0.911873	0.923456	1.10567	1.14314	1.01786	1.04299	0.971128	1.59237	0.778193
SEC31A	Protein transport protein Sec31A	0.376616	-0.0643892	0.95635	O94979-6;O94979-3;O94979-10;O94979-4;O94979-9;O94979-2;O94979;O94979-8;O94979-7;O94979-5	O94979-6;O94979-3;O94979-10;O94979-4;O94979-9;O94979-2;O94979;O94979-8;O94979-7;O94979-5	4	4	4.5				4	4	4.5	4.5	117.67	0	9.5967	79479000	-2.18776	-2.51307	-2.41311	-2.25753	-2.29165	-2.2486	-2.28654	-2.28712	-2.08463	-3.309	-1.58547
HMOX2	Heme oxygenase 2	0.341411	-0.0645375	0.956252	P30519;P30519-2	P30519;P30519-2	4	6	20.9				4	4	20.9	20.9	36.032	0	6.7674	219640000	0.675222	0.69059	0.430143	0.481871	0.620039	0.732368	0.513586	0.669983	-0.0591497	0.572655	-0.828547
SPAG9	C-Jun-amino-terminal kinase-interacting protein 4	0.585401	-0.0650063	0.955941	O60271-5;O60271-3;O60271-9;O60271-4;O60271-2;O60271	O60271-5;O60271-3;O60271-9;O60271-4;O60271-2;O60271	4	4	6.1				4	4	6.1	6.1	103.21	0	5.2102	179940000	-1.56816	-1.61687	-1.57102	-1.3971	-1.41857	-1.47528	-1.48756	-1.51171	-0.707833	NaN	-1.22575
NPEPPSL1;NPEPPS	Puromycin-sensitive aminopeptidase-like protein;Puromycin-sensitive aminopeptidase	0.243412	-0.0651894	0.95582	A6NEC2;P55786;P55786-2	A6NEC2;P55786;P55786-2	2	3	5.2				2	2	5.2	5.2	53.747	0	2.2631	131480000	-1.31444	-1.2759	-1.02784	-1.13358	-1.311	-1.12603	-0.893007	-1.16097	-0.28202	NaN	-0.52097
PELO	Protein pelota homolog	0.461119	-0.065495	0.955617	Q9BRX2	Q9BRX2	4	5	12.2				4	4	12.2	12.2	43.359	0	12.67	155870000	-0.3029	-0.154602	-0.315754	-0.359257	-0.249302	-0.129152	-0.332605	-0.159473	0.653663	0.0359077	-0.670037
CCT6A	T-complex protein 1 subunit zeta	0.171075	-0.0655427	0.955586	P40227;P40227-2;Q92526-3;Q92526	P40227;P40227-2	11	25	29				11	11	29	29	58.024	0	46.929	1739200000	2.51994	2.6912	3.15942	2.97158	2.91908	2.77894	2.94515	2.96113	3.06385	2.48687	3.33719
DYNLRB2;DYNLRB1	Dynein light chain roadblock-type 2;Dynein light chain roadblock-type 1	0.721116	-0.0655937	0.955552	Q8TF09;Q9NP97;Q9NP97-2	Q8TF09;Q9NP97	3	5	26				3	3	26	26	10.855	0	4.3011	202410000	-1.17323	-1.14536	-1.08241	-1.0876	-1.04661	-1.11133	-0.951588	-1.1167	-1.12259	-0.504766	-0.95542
NDUFA10	NADH dehydrogenase [ubiquinone] 1 alpha subcomplex subunit 10, mitochondrial	0.357807	-0.0658612	0.955375	O95299;O95299-2	O95299;O95299-2	4	5	7.9				4	4	7.9	7.9	40.75	0	6.559	112060000	-0.594078	-0.870512	-0.591227	-0.535259	-0.526583	-0.598564	-0.641649	-0.560835	-0.119169	-6.19872	-0.713855
HSDL1	Inactive hydroxysteroid dehydrogenase-like protein 1	0.171408	-0.0660472	0.955252	Q3SXM5;Q3SXM5-2	Q3SXM5;Q3SXM5-2	3	4	9.1				3	3	9.1	9.1	37.001	0	7.1681	47832000	-2.58256	-2.99844	-2.73259	-2.47266	-2.5894	-2.44331	-2.90191	-2.58745	-2.94106	-1.2923	-4.03789
STX5	Syntaxin-5	0.251846	-0.0666213	0.954872	Q13190-3;Q13190-2;Q13190-4;Q13190	Q13190-3;Q13190-2;Q13190-4;Q13190	2	2	10.5				2	2	10.5	10.5	29.887	0	6.1597	61372000	-2.63426	-2.89917	-2.63486	-2.48935	-2.48867	-2.47876	-2.72416	-2.69957	-3.1754	-3.30211	-2.88401
ANAPC1	Anaphase-promoting complex subunit 1	0.425002	-0.0670934	0.954559	Q9H1A4	Q9H1A4	2	2	1.1				2	2	1.1	1.1	216.5	0	2.0306	36876000	-2.57421	-2.55067	-2.62221	-2.79405	-2.49084	-2.52821	-2.69141	-2.5623	-2.52957	-1.21535	-3.10217
COPB2	Coatomer subunit beta	1.49343	-0.0683713	0.953714	P35606-2;P35606	P35606-2;P35606	7	12	8.9				7	7	8.9	8.9	99.045	0	11.937	622450000	1.30762	1.26003	1.23368	1.25924	1.38926	1.3273	1.30405	1.31344	0.0761566	0.763	1.48918
RPL24	60S ribosomal protein L24	0.711852	-0.0689993	0.953299	P83731	P83731	10	19	41.4				10	10	41.4	41.4	17.779	0	19.119	7239700000	3.50826	3.61618	3.44311	3.43578	3.60626	3.50577	3.58212	3.58519	3.79557	4.11482	4.06043
TSN	Translin	0.0761116	-0.0691214	0.953218	Q15631	Q15631	2	2	11				2	2	11	11	26.183	0	2.6883	115870000	0.852541	1.06626	0.569811	0.80529	0.581751	1.81993	0.527315	0.641388	0.967585	-2.59398	2.37126
PSMC4	26S protease regulatory subunit 6B	1.18861	-0.0693598	0.953061	P43686;P43686-2	P43686;P43686-2	8	9	24.2				8	8	24.2	24.2	47.366	0	20.558	760320000	1.29637	1.3917	1.29214	1.37259	1.40054	1.40171	1.37372	1.45427	0.967318	-1.63279	1.5045
HSPA8	Heat shock cognate 71 kDa protein	0.302041	-0.0700316	0.952617	P11142;P11142-2;P54652	P11142;P11142-2	32	144	57				41	34	51.1	49.1	70.897	0	323.31	83252000000	6.90596	7.26535	6.92014	6.94437	7.1081	7.16857	6.95131	7.08796	7.07106	6.883	5.65671
TECR	Very-long-chain enoyl-CoA reductase	0.33093	-0.0702767	0.952455	Q9NZ01;Q9NZ01-2	Q9NZ01;Q9NZ01-2	5	13	11				5	5	11	11	36.034	0	5.804	2320300000	3.85314	3.8214	3.63815	3.64221	3.75286	3.98081	3.65248	3.84985	2.51336	-0.19368	2.21076
CCT4	T-complex protein 1 subunit delta	0.745654	-0.0706062	0.952238	P50991;P50991-2	P50991;P50991-2	14	31	29.1				14	14	29.1	29.1	57.924	0	125.4	4234800000	3.01398	3.02504	3.10714	3.19881	3.11078	3.17607	3.14784	3.19271	2.76662	1.30734	3.54386
POLR2B	DNA-directed RNA polymerase II subunit RPB2	0.400204	-0.070735	0.952153	P30876	P30876	4	4	4.3				4	4	4.3	4.3	133.9	0	6.5298	116760000	-1.29145	-1.38449	-1.52821	-1.36731	-1.1845	-1.28322	-1.47017	-1.35064	-2.13645	NaN	-1.36694
SDHA	Succinate dehydrogenase [ubiquinone] flavoprotein subunit, mitochondrial	0.650405	-0.0710831	0.951923	P31040;P31040-2;P31040-3	P31040;P31040-2;P31040-3	9	15	17.9				9	9	17.9	17.9	72.691	0	65.351	869820000	1.12894	1.18552	1.01666	0.972097	1.14182	1.18302	1.09967	1.16305	0.510194	0.375196	1.28282
GEMIN5	Gem-associated protein 5	0.647732	-0.0713634	0.951738	Q8TEQ6	Q8TEQ6	3	5	2.5				3	3	2.5	2.5	168.59	0	13.348	123860000	-1.30674	-1.25468	-1.49275	-1.36869	-1.31528	-1.28858	-1.27852	-1.25503	-0.656303	-2.60492	-1.5972
STUB1	E3 ubiquitin-protein ligase CHIP	0.472172	-0.0714111	0.951707	Q9UNE7;Q9UNE7-2	Q9UNE7;Q9UNE7-2	4	10	13.9				4	4	13.9	13.9	34.856	0	16.17	287610000	0.0331497	0.227705	0.182478	0.102926	0.0763416	0.2321	0.33359	0.189873	-0.36176	-2.70975	0.215678
CEP170;CEP170P1	Centrosomal protein of 170 kDa;Cep170-like protein	0.350374	-0.0714879	0.951656	Q5SW79-2;Q5SW79-3;Q5SW79;Q96L14	Q5SW79-2;Q5SW79-3;Q5SW79;Q96L14	2	2	1.5				2	2	1.5	1.5	161.41	0	2.4409	72851000	-1.85818	-1.60349	-1.95245	-1.88398	-1.6601	-1.69984	-1.83898	-1.81324	-1.39311	NaN	-1.5984
RCN2	Reticulocalbin-2	0.649783	-0.0715823	0.951594	Q14257;Q14257-2	Q14257;Q14257-2	7	21	27.8				7	7	27.8	27.8	36.876	0	60.748	1122300000	2.3279	2.16482	2.19827	2.24607	2.34132	2.37969	2.19761	2.30477	1.62997	1.10667	2.0142
CHD4;CHD5	Chromodomain-helicase-DNA-binding protein 4;Chromodomain-helicase-DNA-binding protein 5	0.316068	-0.0716949	0.95152	Q14839;Q14839-2;Q8TDI0;Q12873-2;Q12873;Q12873-3	Q14839;Q14839-2;Q8TDI0	4	8	3.6				4	4	3.6	3.6	218	0	30.245	144330000	-1.58658	-1.38017	-1.20197	-1.40611	-1.37427	-1.18361	-1.29271	-1.43746	-0.655684	-1.71409	-0.275304
RPS15A	40S ribosomal protein S15a	0.225089	-0.0718403	0.951424	P62244	P62244	8	9	46.2				8	8	46.2	46.2	14.839	0	8.0826	1916200000	2.43272	1.91153	2.34983	2.32809	2.21684	2.26348	2.445	2.38422	1.50782	1.84834	2.4517
SRPRB	Signal recognition particle receptor subunit beta	0.511044	-0.0726609	0.950883	Q9Y5M8	Q9Y5M8	5	11	26.2				5	5	26.2	26.2	29.702	0	17.444	1978300000	2.44745	2.40197	2.45681	2.66203	2.61831	2.59053	2.47913	2.57094	2.31199	1.21521	1.76726
STRN3	Striatin-3	0.488594	-0.0728559	0.950754	Q13033-2;Q13033;Q9NRL3;Q9NRL3-3	Q13033-2;Q13033	3	3	5.5				3	3	5.5	5.5	77.744	0	5.5545	48809000	-2.50826	-2.65197	-2.63283	-2.47294	-2.38558	-2.43314	-2.54666	-2.60921	-1.99207	NaN	-2.10441
GNB2L1	Guanine nucleotide-binding protein subunit beta-2-like 1;Guanine nucleotide-binding protein subunit beta-2-like 1, N-terminally processed	0.821118	-0.0728683	0.950746	P63244	P63244	9	16	31.2				9	9	31.2	31.2	35.076	0	55.529	1449800000	2.0538	1.95462	2.1117	2.15122	2.10904	2.14965	2.13984	2.1643	4.15481	5.79517	2.98442
RPL38	60S ribosomal protein L38	0.459206	-0.072896	0.950728	P63173	P63173	3	6	50				3	3	50	50	8.2178	0	5.6759	12282000000	4.40657	4.43244	4.33092	4.18764	4.3085	4.51106	4.36705	4.46253	4.26314	1.77523	3.86693
PELP1	Proline-, glutamic acid- and leucine-rich protein 1	0.46927	-0.0729733	0.950677	Q8IZL8	Q8IZL8	4	4	5				4	4	5	5	119.7	0	28.247	119540000	-1.1881	-1.00926	-1.22476	-1.34013	-1.12559	-1.10457	-1.08349	-1.15671	-2.19883	-0.705442	-0.6237
DDOST	Dolichyl-diphosphooligosaccharide--protein glycosyltransferase 48 kDa subunit	0.277334	-0.0734463	0.950365	P39656;P39656-3;P39656-2	P39656;P39656-3;P39656-2	7	13	16				7	7	16	16	50.8	0	35.646	2106500000	2.48389	2.30089	2.46222	2.75749	2.67076	2.66104	2.44234	2.52413	2.66191	1.64834	2.12129
RHOA	Transforming protein RhoA	0.698797	-0.0736899	0.950205	P61586	P61586	2	13	32.1				7	7	32.1	12.4	21.768	0	33.614	718870000	1.76632	1.69369	1.69829	1.68006	1.86775	1.85923	1.72765	1.6785	1.59395	3.11051	1.85028
PARK7	Protein deglycase DJ-1	0.238843	-0.0739231	0.950051	Q99497	Q99497	5	7	26.5				5	5	26.5	26.5	19.891	0	28.061	626620000	0.987986	1.01809	1.43515	1.13241	1.14182	1.11417	1.43165	1.18169	1.40862	5.03123	2.31938
MCU	Calcium uniporter protein, mitochondrial	0.344279	-0.0740571	0.949963	Q8NE86-3;Q8NE86-2;Q8NE86	Q8NE86-3;Q8NE86-2;Q8NE86	2	2	7				2	2	7	7	35.158	0.0034176	1.2926	56195000	-3.28261	-3.21616	-3.4292	-3.3703	-3.16824	-3.10575	-3.46896	-3.25909	-1.29776	-0.49697	-3.87669
NTPCR	Cancer-related nucleoside-triphosphatase	0.142148	-0.0745873	0.949614	Q9BSD7	Q9BSD7	2	2	14.2				2	2	14.2	14.2	20.713	0	5.0244	246280000	-0.934664	-1.48693	-0.838551	-0.558674	-0.877142	-0.883392	-0.984371	-0.775568	-2.08074	NaN	-1.15662
DNAJA2	DnaJ homolog subfamily A member 2	0.505193	-0.0745935	0.94961	O60884	O60884	5	7	17.7				5	5	17.7	17.7	45.745	0	13.464	872190000	1.9453	1.94459	1.78926	1.78272	1.95169	2.03173	1.79962	1.97719	0.420211	-1.72729	0.79873
GCN1L1	Translational activator GCN1	0.714659	-0.0746212	0.949591	Q92616	Q92616	32	56	14.3				32	32	14.3	14.3	292.75	0	139.75	3768600000	3.54731	3.59266	3.47111	3.60756	3.64962	3.68405	3.50937	3.67408	4.24441	4.29363	3.15521
ATAD3A	ATPase family AAA domain-containing protein 3A	0.566453	-0.0748796	0.949421	Q9NVI7-2;Q9NVI7;Q9NVI7-3;Q5T9A4-2;Q5T2N8	Q9NVI7-2;Q9NVI7;Q9NVI7-3	10	45	48.3				28	28	48.3	24.1	66.217	0	137.46	6079300000	4.17546	4.14489	4.06846	4.20346	4.27892	4.30724	4.06443	4.24118	4.54799	5.36658	4.2018
HACD3	Very-long-chain (3R)-3-hydroxyacyl-CoA dehydratase 3	0.481564	-0.0749402	0.949381	Q9P035;Q9P035-2	Q9P035;Q9P035-2	4	6	12.7				4	4	12.7	12.7	43.159	0	59.333	147680000	-1.35345	-1.33286	-1.55699	-1.27565	-1.38631	-1.21533	-1.29991	-1.31763	-4.66182	-1.97994	-1.61596
ATP6V1A	V-type proton ATPase catalytic subunit A	0.82198	-0.0750146	0.949333	P38606-2;P38606	P38606-2;P38606	3	3	7.7				3	3	7.7	7.7	64.735	0	4.0349	251640000	0.1343	-0.0327816	-0.00115967	-0.0378666	0.0496788	0.111727	0.0618095	0.139336	0.109102	-0.81494	0.579324
USP9X	Probable ubiquitin carboxyl-terminal hydrolase FAF-X	0.569115	-0.075232	0.949189	Q93008-1;Q93008;O00507;O00507-2	Q93008-1;Q93008	18	33	9.7				18	18	9.7	9.7	290.46	0	101.5	1472200000	2.17007	2.26701	2.07305	2.119	2.18774	2.35538	2.14332	2.24361	2.72194	3.2785	1.43212
PSMD6	26S proteasome non-ATPase regulatory subunit 6	0.436658	-0.0753288	0.949126	Q15008;Q15008-4;Q15008-3;Q15008-2	Q15008;Q15008-4;Q15008-3;Q15008-2	3	5	9.8				3	3	9.8	9.8	45.531	0	5.6304	118920000	-1.19112	-1.0679	-1.20232	-1.40354	-1.17415	-1.13821	-1.04908	-1.20212	-1.97913	-0.851565	-0.601594
ST13P4;ST13;ST13P5	Putative protein FAM10A4;Hsc70-interacting protein;Putative protein FAM10A5	0.460022	-0.0755372	0.948989	Q8IZP2;P50502;Q8NFI4	Q8IZP2;P50502;Q8NFI4	4	5	14.6				4	4	14.6	14.6	27.406	0	13.195	412750000	1.30896	1.18451	1.42949	1.32119	1.29907	1.30823	1.53278	1.40623	1.15447	-4.97771	1.85781
ABCD3	ATP-binding cassette sub-family D member 3	0.292386	-0.0757298	0.948862	P28288;P28288-2;P28288-3	P28288;P28288-2	5	5	10.6				5	5	10.6	10.6	75.475	0	16.342	486760000	0.68083	0.537325	0.641876	0.482601	0.856552	0.780672	0.422144	0.586184	1.2461	1.35567	0.485515
IRAK1	Interleukin-1 receptor-associated kinase 1	0.0766861	-0.0757442	0.948853	P51617-4;P51617-2;P51617-3;P51617;P51955-3;P51955-2;P51955-4;P51955	P51617-4;P51617-2;P51617-3;P51617	4	11	8.2				4	4	8.2	8.2	68.021	0	10.348	169270000	0.991636	1.67156	0.508274	0.131123	1.09511	1.13318	0.639603	0.737667	-4.27602	-1.12243	-1.51363
KPNB1	Importin subunit beta-1	0.719022	-0.0760465	0.948654	Q14974;Q14974-2	Q14974;Q14974-2	17	36	27.4				18	18	27.4	26.4	97.169	0	59.354	9081700000	3.88354	3.73065	3.87084	3.92137	3.9178	3.85439	3.93645	4.00195	3.40696	3.14874	3.93777
GIGYF2	PERQ amino acid-rich with GYF domain-containing protein 2	1.62735	-0.0784216	0.947093	Q6Y7W6-4;Q6Y7W6-5;Q6Y7W6;Q6Y7W6-3	Q6Y7W6-4;Q6Y7W6-5;Q6Y7W6;Q6Y7W6-3	8	13	8.8				8	8	8.8	8.8	148.63	0	43.415	343930000	0.519581	0.49646	0.514074	0.490482	0.58992	0.638987	0.517136	0.588242	-0.47172	1.28064	0.956946
SGPL1	Sphingosine-1-phosphate lyase 1	0.338467	-0.0785789	0.94699	O95470	O95470	4	5	8.3				4	4	8.3	8.3	63.523	0	4.0347	206800000	1.15666	1.38507	1.27157	1.19006	1.44983	1.49257	1.24192	1.13336	3.2746	4.11506	-1.52479
SLC30A7	Zinc transporter 7	0.556089	-0.079123	0.946633	Q8NEW0	Q8NEW0	2	3	6.6				2	2	6.6	6.6	41.625	0	5.595	202800000	-1.23499	-1.09352	-1.33375	-1.31724	-1.14889	-1.0797	-1.26001	-1.1744	-3.40686	-0.45659	-1.84185
COPG1	Coatomer subunit gamma-1	0.257389	-0.0792589	0.946544	Q9Y678	Q9Y678	2	3	3.3				3	3	3.3	2.4	97.717	0	4.0113	190290000	-1.08933	-1.60564	-1.18296	-1.08244	-1.13218	-1.17315	-1.11764	-1.22038	-2.5437	-2.14176	-1.05524
SMN1	Survival motor neuron protein	0.54861	-0.0792656	0.946539	Q16637-4;Q16637-2;Q16637-3;Q16637	Q16637-4;Q16637-2;Q16637-3;Q16637	3	4	14.8				3	3	14.8	14.8	27.135	0	4.6914	178290000	-1.52194	-1.63453	-1.57604	-1.60797	-1.41427	-1.38245	-1.62755	-1.59914	-2.9687	NaN	-1.27306
RPS9	40S ribosomal protein S9	0.820333	-0.0800166	0.946047	P46781	P46781	10	21	44.3				10	10	44.3	44.3	22.591	0	12.105	7892000000	3.88261	3.80833	3.75241	3.75367	3.95807	3.90797	3.77912	3.87192	3.91242	2.01388	3.94725
AAAS	Aladin	0.375068	-0.0802679	0.945882	Q9NRG9-2;Q9NRG9	Q9NRG9-2;Q9NRG9	6	8	16				6	6	16	16	55.813	0	17.392	340010000	0.349932	0.206526	0.397911	0.484221	0.562437	0.561569	0.27408	0.361574	-0.389388	1.33285	-0.149295
SEC62	Translocation protein SEC62	0.454913	-0.0803571	0.945824	Q99442	Q99442	2	3	4.5				2	2	4.5	4.5	45.861	0.00074906	1.6498	46819000	-2.33133	-2.04481	-2.29595	-2.37964	-2.24426	-2.19737	-2.17451	-2.11416	-3.77304	-2.22168	-1.83297
MOCS3	Adenylyltransferase and sulfurtransferase MOCS3;Molybdopterin-synthase adenylyltransferase;Molybdopterin-synthase sulfurtransferase	0.333976	-0.0815215	0.94506	O95396	O95396	2	2	5.4				2	2	5.4	5.4	49.669	0	1.9407	8107800	-4.7227	-4.40141	-4.72437	-4.72628	-4.49487	-4.41906	-4.71585	-4.61889	-2.25971	NaN	-4.26378
EPPK1	Epiplakin	0.978375	-0.081562	0.945034	P58107	P58107	2	5	3.1				2	2	3.1	3.1	555.61	0	9.6172	93389000	-1.65185	-1.63182	-1.72036	-1.65358	-1.66161	-1.48043	-1.57876	-1.61056	-5.30614	-1.69591	-0.811078
PRKDC	DNA-dependent protein kinase catalytic subunit	0.912151	-0.0820942	0.944685	P78527;P78527-2	P78527;P78527-2	81	149	22.5				81	81	22.5	22.5	469.08	0	323.31	15373000000	5.25078	5.24183	5.15167	5.17283	5.28083	5.36372	5.18295	5.31798	4.60428	4.20674	4.51104
RPL22	60S ribosomal protein L22	0.307415	-0.0821099	0.944675	P35268	P35268	2	3	21.9				2	2	21.9	21.9	14.787	0	86.942	302800000	-0.572535	-0.753626	-0.583502	-0.532309	-0.337524	-0.374292	-0.660585	-0.741129	-0.31916	-7.73456	-1.46333
RPL35A	60S ribosomal protein L35a	0.537263	-0.0824976	0.944421	P18077	P18077	7	13	37.3				7	7	37.3	37.3	12.538	0	10.291	1019100000	2.05933	1.75414	1.95411	1.99407	2.10204	1.9844	1.99143	2.01377	-1.57787	-0.583071	1.69857
TTC27	Tetratricopeptide repeat protein 27	0.809691	-0.0825024	0.944418	Q6P3X3	Q6P3X3	3	4	7.5				4	4	7.5	6.3	96.631	0	6.4111	286670000	-0.855516	-0.764933	-0.93857	-0.893021	-0.763336	-0.737993	-0.88353	-0.737171	1.23282	2.59266	-1.68587
CKAP5	Cytoskeleton-associated protein 5	0.888474	-0.0826592	0.944315	Q14008-2;Q14008;Q14008-3	Q14008-2;Q14008;Q14008-3	8	9	5.2				8	8	5.2	5.2	218.52	0	19.059	229410000	-0.0106792	-0.0177879	-0.137508	-0.0832176	0.0427532	0.106522	-0.0653553	-0.00247574	-0.473112	0.567222	-0.795382
C12orf57	Protein C10	0.504438	-0.0827312	0.944268	Q99622	Q99622	3	3	40.5				3	3	40.5	40.5	13.178	0	5.4283	200750000	-0.54525	-0.632149	-0.683739	-0.62734	-0.651676	-0.395851	-0.665007	-0.445019	-0.442485	NaN	-1.75795
HCCS	Cytochrome c-type heme lyase	0.328497	-0.0828781	0.944172	P53701	P53701	2	2	7.1				2	2	7.1	7.1	30.601	0.0045425	1.1391	63166000	-2.27802	-2.30335	-2.46471	-2.27121	-2.09743	-2.10029	-2.5083	-2.27977	NaN	NaN	-3.28957
PSMD7	26S proteasome non-ATPase regulatory subunit 7	0.257653	-0.0829339	0.944136	P51665	P51665	2	3	11.4				2	2	11.4	11.4	37.025	0	9.3516	153300000	-0.548527	-0.998493	-0.477093	-0.467844	-0.559248	-0.444895	-0.624895	-0.531183	-1.77869	-1.50836	0.0322294
ATP5L	ATP synthase subunit g, mitochondrial	0.647671	-0.0831032	0.944025	O75964	O75964	3	4	24.3				3	3	24.3	24.3	11.428	0	21.239	490080000	0.690807	0.807327	0.811876	0.687731	0.967758	0.852648	0.748444	0.761305	0.210191	-5.06044	0.544896
PNN	Pinin	0.335204	-0.0833073	0.943891	Q9H307;Q9H307-2	Q9H307;Q9H307-2	3	4	4				3	3	4	4	81.613	0	6.4602	161980000	-0.487257	-0.824911	-0.47436	-0.828245	-0.567911	-0.527357	-0.514038	-0.672237	-1.56541	-0.00314713	0.442815
NDUFV1	NADH dehydrogenase [ubiquinone] flavoprotein 1, mitochondrial	0.472514	-0.0833988	0.943831	P49821-2;P49821	P49821-2;P49821	5	8	16.9				5	5	16.9	16.9	49.867	0	8.0447	194780000	-0.709354	-0.576702	-0.798548	-0.70414	-0.489573	-0.51268	-0.743973	-0.708923	-3.24445	0.688457	-1.04599
ATP5H	ATP synthase subunit d, mitochondrial	0.409799	-0.084053	0.943404	O75947-2;O75947	O75947-2;O75947	3	6	20.4				3	3	20.4	20.4	15.773	0	6.3415	452820000	-0.0358734	-0.209042	-0.0965118	0.1161	0.14797	0.0914173	-0.127214	-0.00128746	NaN	NaN	-0.447354
RPL18A	60S ribosomal protein L18a	0.867109	-0.0845876	0.943054	Q02543	Q02543	6	18	31.8				6	6	31.8	31.8	20.762	0	82.404	2878600000	3.0976	2.90796	2.97664	2.96492	3.14383	3.0906	3.02064	3.0304	1.79311	-0.189731	3.40511
AIP	AH receptor-interacting protein	0.906907	-0.0846353	0.943023	O00170	O00170	2	3	9.4				2	2	9.4	9.4	37.636	0	3.4471	41065000	-2.35248	-2.2321	-2.26893	-2.22693	-2.1199	-2.15399	-2.17579	-2.29221	-2.58943	-0.882327	-1.87795
CSE1L	Exportin-2	0.864186	-0.0849123	0.942842	P55060-3;P55060;P55060-4;P55060-2	P55060-3;P55060;P55060-4	18	43	20.8				19	19	20.8	20.8	107.78	0	92.788	6344900000	4.10627	3.96576	3.96064	4.01877	4.1183	4.11087	3.9959	4.16602	3.63367	2.61298	3.40156
SF1	Splicing factor 1	0.49026	-0.0849957	0.942787	Q15637-4;Q15637-6;Q15637-3;Q15637-2;Q15637;Q15637-5;Q15637-7	Q15637-4;Q15637-6;Q15637-3;Q15637-2;Q15637;Q15637-5;Q15637-7	4	6	10.4				4	4	10.4	10.4	59.711	0	23.762	509990000	-0.0960178	-0.433821	-0.192955	-0.145994	-0.19912	-0.143305	-0.094883	-0.0914974	0.553329	1.78347	0.126206
PHB2	Prohibitin-2	0.609071	-0.0852666	0.94261	Q99623;Q99623-2	Q99623;Q99623-2	20	47	66.2				20	20	66.2	66.2	33.296	0	162.55	9875800000	4.67648	4.7902	4.60672	4.72698	4.86213	4.8728	4.64139	4.76512	4.13979	2.83767	4.6166
NUP54	Nucleoporin p54	0.355016	-0.0855427	0.94243	Q7Z3B4;Q7Z3B4-3;Q7Z3B4-2	Q7Z3B4;Q7Z3B4-3;Q7Z3B4-2	2	2	4.3				2	2	4.3	4.3	55.435	0	1.9923	35601000	-3.05781	-3.16987	-3.10691	-2.73487	-2.98059	-2.8299	-2.99371	-2.92309	-3.46138	-0.758008	-2.99894
PSMA6	Proteasome subunit alpha type-6	0.239023	-0.0856323	0.942371	P60900;P60900-2;P60900-3	P60900;P60900-2;P60900-3	3	5	15.9				3	3	15.9	15.9	27.399	0	6.7751	161170000	-0.213486	0.155352	0.308956	0.0603867	0.0330639	-0.00794601	0.404631	0.223989	-0.282286	-0.572442	1.17207
NCAPD2	Condensin complex subunit 1	0.942407	-0.0857573	0.94229	Q15021	Q15021	5	9	5.6				5	5	5.6	5.6	157.18	0	26.421	235460000	-0.600431	-0.472181	-0.630173	-0.609175	-0.441244	-0.468761	-0.577093	-0.481833	-3.08731	-2.57562	-0.737897
ARL1	ADP-ribosylation factor-like protein 1	0.566474	-0.0860472	0.9421	P40616-2;P40616	P40616-2;P40616	4	9	36.6				4	4	36.6	36.6	18.565	0	55.867	678880000	0.207857	0.33069	0.0850983	0.221754	0.275475	0.40539	0.169468	0.339256	0.235209	-1.02679	-1.17474
FBXO3	F-box only protein 3	0.0824453	-0.0863433	0.941907	Q9UK99-3;Q9UK99-2;Q9UK99	Q9UK99-3;Q9UK99-2;Q9UK99	2	2	6.6				2	2	6.6	6.6	46.974	0	7.7174	128050000	-3.20407	-4.23706	-3.31886	-2.46098	-2.91529	-3.26814	-3.34466	-3.34751	NaN	NaN	-5.07715
RANBP2	E3 SUMO-protein ligase RanBP2	0.845134	-0.0866241	0.941724	P49792;Q99666;O14715;Q99666-2;P0DJD0;P0DJD1	P49792	4	9	3.3				9	9	3.3	1.6	358.2	0	9.0562	319180000	0.152681	0.107716	0.138918	0.262167	0.209623	0.309271	0.164076	0.325008	0.681331	1.79467	0.693389
S100A11	Protein S100-A11;Protein S100-A11, N-terminally processed	0.351339	-0.0872588	0.94131	P31949	P31949	2	2	27.6				2	2	27.6	27.6	11.74	0	3.1245	181860000	-0.0484295	-0.434351	-0.0956497	-0.311321	-0.142706	-0.264256	0.00985909	-0.143614	0.331714	NaN	0.365769
MOB4	MOB-like protein phocein	0.380905	-0.087904	0.940889	Q9Y3A3-2;Q9Y3A3-3;Q9Y3A3	Q9Y3A3-2;Q9Y3A3-3;Q9Y3A3	2	4	19.2				2	2	19.2	19.2	22.318	0	25.494	43459000	-3.35904	-3.15108	-3.3248	-3.38673	-3.14461	-3.05027	-3.45103	-3.22413	-4.83546	-3.30386	-3.82405
COMT	Catechol O-methyltransferase	1.23413	-0.0880613	0.940786	P21964-2;P21964	P21964-2;P21964	4	4	20.8				4	4	20.8	20.8	24.449	0	9.5278	526600000	0.914974	0.893211	0.781233	0.88365	0.951139	0.99316	0.892632	0.988382	-0.297383	-4.18324	0.341855
NDC1	Nucleoporin NDC1	0.525793	-0.0881028	0.940759	Q9BTX1-6;Q9BTX1-5;Q9BTX1-2;Q9BTX1;Q9BTX1-4;Q9BTX1-3	Q9BTX1-6;Q9BTX1-5;Q9BTX1-2;Q9BTX1;Q9BTX1-4	5	7	14.5				5	5	14.5	14.5	63.157	0	12.596	256870000	0.0755787	0.233231	-0.0242977	0.177025	0.158415	0.31406	0.0797176	0.261755	-0.947171	-1.96625	-0.398925
TSPO	Translocator protein	0.466721	-0.0881071	0.940756	P30536	P30536	2	4	18.3				2	2	18.3	18.3	18.828	0	14.001	810620000	1.22511	1.22961	1.097	0.988544	1.30352	1.35697	1.1205	1.11169	-1.65054	1.63123	-0.820779
STIP1	Stress-induced-phosphoprotein 1	0.495141	-0.0888429	0.940277	P31948-3;P31948;P31948-2	P31948-3;P31948;P31948-2	3	5	9.1				4	4	9.1	7.1	59.777	0	5.6632	561480000	2.00448	1.85114	2.20375	2.05748	2.04481	2.10032	2.22326	2.10383	2.93989	2.99867	2.59256
HNRNPUL1	Heterogeneous nuclear ribonucleoprotein U-like protein 1	0.370664	-0.0891166	0.940098	Q9BUJ2-2;Q9BUJ2;Q9BUJ2-4;Q9BUJ2-3;Q9BUJ2-5	Q9BUJ2-2;Q9BUJ2;Q9BUJ2-4;Q9BUJ2-3	33	103	49				33	33	49	49	90.291	0	323.31	54314000000	6.28835	6.26531	6.3198	6.30823	6.66674	6.41376	6.22923	6.22842	5.71583	4.52175	7.47169
RPL21	60S ribosomal protein L21	0.724643	-0.0892549	0.940008	P46778	P46778	9	16	52.5				9	9	52.5	52.5	18.565	0	11.637	4298900000	3.75516	3.85821	3.63961	3.65944	3.90339	3.83585	3.76928	3.7609	3.64641	-0.154906	4.22891
TPM3	Tropomyosin alpha-3 chain	0.19314	-0.089447	0.939883	P06753-2;P06753-5;P06753-3;P06753-6;P06753-4;P06753-7;CON__Q3SX28;P09493-3;P09493-2;P67936-2;P09493-8;P09493-7;P09493-6;P09493-4;P09493-9;P07951;P07951-2;P09493;P09493-10;P07951-3;P09493-5;P06753	P06753-2;P06753-5;P06753-3;P06753-6	4	9	21.8				5	5	21.8	16.1	29.032	0	6.5971	2082200000	1.57648	0.938808	1.6754	1.64278	1.59951	1.61349	1.38989	1.58836	2.79116	3.69691	1.12268
COPB1	Coatomer subunit beta	0.677824	-0.0896101	0.939777	P53618	P53618	4	5	5.2				4	4	5.2	5.2	107.14	0	36.796	222430000	-0.528395	-0.707241	-0.532375	-0.416	-0.446583	-0.402454	-0.472942	-0.503592	-2.52798	-1.17439	-0.890721
ARCN1	Coatomer subunit delta	1.44788	-0.0900545	0.939487	P48444;P48444-2	P48444;P48444-2	5	5	11.2				5	5	11.2	11.2	57.21	0	8.7485	511150000	1.42363	1.48876	1.50241	1.38496	1.5947	1.52857	1.52649	1.51023	2.53008	0.697841	1.238
PSMD1	26S proteasome non-ATPase regulatory subunit 1	1.30544	-0.0901494	0.939425	Q99460-2;Q99460	Q99460-2;Q99460	11	15	17.2				11	11	17.2	17.2	102.26	0	52.884	887660000	1.2693	1.21972	1.1807	1.30067	1.36783	1.38472	1.29294	1.28551	1.78047	2.74751	1.50411
CAND1	Cullin-associated NEDD8-dissociated protein 1	1.13687	-0.0904508	0.939229	Q86VP6;Q86VP6-2;Q86VP6-3;O75155-2;O75155	Q86VP6;Q86VP6-2	22	36	22.5				22	22	22.5	22.5	136.37	0	56.425	3175900000	3.53937	3.4489	3.47637	3.52358	3.547	3.64195	3.50675	3.65432	3.94554	4.53413	2.81527
SCO2	Protein SCO2 homolog, mitochondrial	0.293554	-0.0906472	0.939101	O43819	O43819	4	6	23.7				4	4	23.7	23.7	29.81	0	10.679	397170000	-0.235731	0.14147	-0.322042	-0.398577	-0.00436211	-0.0654621	-0.21711	-0.165358	0.0938072	-3.2532	-0.606963
SACM1L	Phosphatidylinositide phosphatase SAC1	0.543904	-0.0906615	0.939092	Q9NTJ5;Q9NTJ5-2	Q9NTJ5;Q9NTJ5-2	6	7	11.2				6	6	11.2	11.2	66.966	0	91.468	327560000	0.609335	0.43075	0.458923	0.553457	0.778612	0.621315	0.476858	0.538326	-1.16228	-1.25891	-0.12514
ATP5A1	ATP synthase subunit alpha, mitochondrial	0.801646	-0.0912299	0.938722	P25705;P25705-2;P25705-3	P25705;P25705-2;P25705-3	26	67	44.5				26	26	44.5	44.5	59.75	0	323.31	11250000000	5.07178	4.91445	4.98087	5.00732	5.19234	5.11794	4.97501	5.05405	5.33878	6.60338	5.15364
NUP155	Nuclear pore complex protein Nup155	0.588613	-0.0920506	0.938188	O75694-2;O75694	O75694-2;O75694	7	9	6.7				7	7	6.7	6.7	149.01	0	32.958	300130000	-0.144405	-0.0500317	-0.347342	-0.282452	-0.103704	-0.0391006	-0.186535	-0.126688	-0.533354	-0.685565	0.216905
PSMC5	26S protease regulatory subunit 8	0.703202	-0.0921626	0.938115	P62195-2;P62195;Q8NB90-3;Q8NB90-2;Q8NB90	P62195-2;P62195	8	13	24.4				8	8	24.4	24.4	44.784	0	30.192	620720000	1.52433	1.61872	1.41663	1.37069	1.49736	1.64902	1.57261	1.58002	-0.339723	-0.674484	2.00381
PRPF19	Pre-mRNA-processing factor 19	1.59284	-0.0922232	0.938076	Q9UMS4	Q9UMS4	6	18	16.1				6	6	16.1	16.1	55.18	0	45.006	715180000	1.34147	1.2329	1.27743	1.2558	1.37734	1.41605	1.36771	1.31539	0.768451	1.08099	1.39917
RPN1	Dolichyl-diphosphooligosaccharide--protein glycosyltransferase subunit 1	0.271193	-0.0923858	0.93797	P04843	P04843	26	53	49.4				26	26	49.4	49.4	68.569	0	63.402	6538500000	4.18384	4.57864	4.0717	3.99379	4.36757	4.40939	4.17686	4.24369	3.82052	3.34215	4.2566
WDR61	WD repeat-containing protein 61;WD repeat-containing protein 61, N-terminally processed	0.470423	-0.0929389	0.937611	Q9GZS3	Q9GZS3	2	3	8.2				2	2	8.2	8.2	33.58	0	2.8071	30192000	-2.54592	-2.44677	-2.53262	-2.41726	-2.32373	-2.20043	-2.58654	-2.46011	-5.70173	-5.42535	-3.9539
NUP205	Nuclear pore complex protein Nup205	0.775342	-0.0950098	0.936266	Q92621	Q92621	4	4	2.2				4	4	2.2	2.2	227.92	0	4.4506	157400000	-1.35879	-1.14891	-1.35357	-1.21353	-1.2435	-1.14537	-1.20177	-1.10413	-0.869372	-1.64702	-1.03918
EPRS	Bifunctional glutamate/proline--tRNA ligase;Glutamate--tRNA ligase;Proline--tRNA ligase	1.61776	-0.0952158	0.936132	P07814	P07814	20	26	13.9				20	20	13.9	13.9	170.59	0	43.118	2385100000	3.29938	3.17365	3.28408	3.26834	3.36651	3.3846	3.32265	3.33256	3.92351	3.94178	3.49288
COA3	Cytochrome c oxidase assembly factor 3 homolog, mitochondrial	0.328255	-0.0953803	0.936025	Q9Y2R0	Q9Y2R0	4	11	30.2				4	4	30.2	30.2	11.731	0	7.1388	340380000	0.65136	0.713772	0.629679	0.672569	0.759998	1.10468	0.54558	0.638641	0.676396	0.342259	0.9175
HSDL2	Hydroxysteroid dehydrogenase-like protein 2	0.924074	-0.0965767	0.93525	Q6YN16;Q6YN16-2	Q6YN16;Q6YN16-2	5	8	17.9				5	5	17.9	17.9	45.394	0	27.188	537380000	2.15348	1.98254	2.10234	2.02571	2.06911	2.23149	2.1392	2.21058	1.64874	-0.824227	1.20204
GART	Trifunctional purine biosynthetic protein adenosine-3;Phosphoribosylamine--glycine ligase;Phosphoribosylformylglycinamidine cyclo-ligase;Phosphoribosylglycinamide formyltransferase	0.200243	-0.0971088	0.934905	P22102;P22102-2	P22102;P22102-2	6	6	7.9				6	6	7.9	7.9	107.77	0	11.52	422600000	0.930599	0.573811	1.37269	1.23509	1.0093	1.00157	1.30118	1.18858	0.910177	0.904584	1.72031
U2SURP	U2 snRNP-associated SURP motif-containing protein	0.637696	-0.0972171	0.934835	O15042-3;O15042-2;O15042	O15042-3;O15042-2;O15042	2	2	3.7				2	2	3.7	3.7	72.523	0.0021771	1.4948	71713000	-2.29936	-2.17939	-2.25216	-2.23731	-2.17243	-2.01108	-2.32444	-2.0714	-3.29311	NaN	-2.47266
SPTLC1	Serine palmitoyltransferase 1	0.447136	-0.0973005	0.93478	O15269;O15269-2	O15269	7	9	15.6				7	7	15.6	15.6	52.743	0	23.082	507820000	1.14799	1.00624	1.3309	1.37224	1.42736	1.19359	1.33135	1.29428	-0.118506	-0.210868	0.0649309
RPS11	40S ribosomal protein S11	0.751742	-0.097805	0.934454	P62280	P62280	12	23	56.3				12	12	56.3	56.3	18.431	0	42.06	12661000000	4.47854	4.4875	4.53393	4.26445	4.49775	4.5197	4.59939	4.5388	4.87677	3.30197	5.15115
DPY30	Protein dpy-30 homolog	0.537089	-0.0980248	0.934311	Q9C005	Q9C005	3	4	38.4				3	3	38.4	38.4	11.25	0	8.8591	310660000	-0.0643387	0.276634	0.152859	-0.054472	0.193069	0.140118	0.209074	0.160521	-0.233036	-1.10996	0.796817
PCYT1B;PCYT1A	Choline-phosphate cytidylyltransferase B;Choline-phosphate cytidylyltransferase A	1.43714	-0.0980959	0.934265	Q9Y5K3-2;Q9Y5K3-4;Q9Y5K3-3;P49585;Q9Y5K3	Q9Y5K3-2;Q9Y5K3-4;Q9Y5K3-3;P49585;Q9Y5K3	2	3	6.7				2	2	6.7	6.7	38.086	0	11.013	56196000	-2.36558	-2.41895	-2.3711	-2.37964	-2.31517	-2.22548	-2.36954	-2.23269	-1.37443	0.14599	-2.55551
PPM1H	Protein phosphatase 1H	0.181662	-0.0983419	0.934106	Q9ULR3	Q9ULR3	58	1596	85.2				59	59	85.2	83.5	56.447	0	323.31	4801100000000	13.3304	14.0057	13.1681	13.2264	13.6599	13.6786	13.3288	13.4566	11.3443	9.83827	5.40109
GOLIM4	Golgi integral membrane protein 4	0.428298	-0.0984154	0.934058	O00461	O00461	2	3	3.4				2	2	3.4	3.4	81.879	0	2.6179	27332000	-1.83305	-1.65193	-1.66495	-1.70733	-1.43523	-1.48318	-1.82568	-1.71951	-2.09637	NaN	-0.67092
STX7	Syntaxin-7	0.365003	-0.0986571	0.933902	O15400-2;O15400	O15400-2;O15400	3	5	21.3				3	3	21.3	21.3	27.4	0	22.076	151550000	-1.31473	-1.70067	-1.48794	-1.23443	-1.17986	-1.34087	-1.42772	-1.39468	-2.43811	-1.31729	-1.67062
MLST8	Target of rapamycin complex subunit LST8	0.4116	-0.0989585	0.933707	Q9BVC4-3;Q9BVC4-5;Q9BVC4	Q9BVC4-3;Q9BVC4-5;Q9BVC4	2	1	7.7				2	2	7.7	7.7	28.728	0.0046636	1.2079	129820000	-0.759302	-0.518703	-0.930574	-0.875252	-0.681549	-0.591249	-0.822071	-0.593128	NaN	NaN	-1.48555
CAD	CAD protein;Glutamine-dependent carbamoyl-phosphate synthase;Aspartate carbamoyltransferase;Dihydroorotase	0.852271	-0.0992041	0.933548	P27708	P27708	29	61	16.2				29	29	16.2	16.2	242.98	0	167.59	3483800000	3.54366	3.61784	3.53277	3.61968	3.7445	3.76961	3.53152	3.66513	5.12933	9.95122	3.49034
COX4I1	Cytochrome c oxidase subunit 4 isoform 1, mitochondrial	0.408802	-0.0992389	0.933525	P13073	P13073	5	10	28.4				5	5	28.4	28.4	19.576	0	6.8302	1989600000	2.38594	2.6587	2.29121	2.21543	2.59046	2.53863	2.41065	2.4085	1.85281	2.68502	2.71644
PSMC6	26S protease regulatory subunit 10B	1.20715	-0.0994749	0.933373	P62333	P62333	12	25	38				12	12	38	38	44.172	0	59.606	2143900000	3.15167	3.20701	3.035	3.07021	3.17542	3.25156	3.18962	3.24518	2.96095	2.5451	3.35756
TMED7	Transmembrane emp24 domain-containing protein 7	0.339452	-0.0998497	0.93313	Q86XR7-2;Q9Y3B3-2;Q9Y3B3	Q86XR7-2;Q9Y3B3-2;Q9Y3B3	3	6	10.4				3	3	10.4	10.4	46.172	0	22.908	164640000	-0.761738	-0.352734	-0.837561	-0.798885	-0.460648	-0.527912	-0.690475	-0.672483	-1.29005	-0.739634	-1.0106
ACLY	ATP-citrate synthase	0.355823	-0.100121	0.932955	P53396;P53396-2;P53396-3	P53396;P53396-2;P53396-3	7	10	8.1				7	7	8.1	8.1	120.84	0	8.5638	476070000	0.686274	0.349209	0.606426	0.909655	0.798904	0.803268	0.666956	0.682917	1.29268	2.81392	0.798547
LBR	Lamin-B receptor	0.905709	-0.100374	0.932791	Q14739	Q14739	6	9	9.8				6	6	9.8	9.8	70.702	0	6.0908	999480000	1.18926	1.00023	1.17963	1.00071	1.14724	1.23647	1.19399	1.19362	0.401864	0.254925	1.02436
OVOS2;OVOS1	Ovostatin homolog 2;Ovostatin homolog 1	0.375495	-0.100511	0.932703	Q6IE36;Q6IE37	Q6IE36;Q6IE37	2	1	1.3				2	2	1.3	1.3	161.25	0.0046327	1.1897	183860000	-0.879654	-1.38305	-1.18916	-1.17581	-1.10555	-1.15062	-1.06137	-0.908094	-0.783787	-1.09809	-1.87243
TUBA1C	Tubulin alpha-1C chain	0.42007	-0.101163	0.932281	Q9BQE3	Q9BQE3	2	10	63.5				27	2	9.1	9.1	49.895	0	33.539	1510600000	1.21154	1.46545	1.50834	1.49163	1.52423	1.66422	1.29354	1.59961	2.04864	3.17712	0.647828
PABPC1;PABPC3	Polyadenylate-binding protein 1;Polyadenylate-binding protein 3	0.964462	-0.101464	0.932087	P11940-2;P11940;Q9H361;Q4VXU2-2;Q4VXU2	P11940-2;P11940;Q9H361	7	20	25				12	12	25	12.1	61.18	0	44.792	2650700000	3.16968	2.98243	3.11943	3.14918	3.28633	3.23477	3.16824	3.13725	3.22444	3.84275	3.69981
BAG4	BAG family molecular chaperone regulator 4	0.25394	-0.10154	0.932038	O95429-2;O95429	O95429-2;O95429	2	3	4.8				2	2	4.8	4.8	45.409	0	23.328	188710000	0.138695	0.411827	0.0191288	0	0.430454	0.4939	-0.0741501	0.125605	-3.73617	NaN	0.402652
SNRPF	Small nuclear ribonucleoprotein F	0.65521	-0.101717	0.931923	P62306	P62306	2	4	33.7				2	2	33.7	33.7	9.7251	0	3.1803	367140000	0.394459	0.10972	0.364042	0.43313	0.463274	0.413097	0.431562	0.400286	0.262241	NaN	0.32792
RPL18	60S ribosomal protein L18	0.310552	-0.102057	0.931703	Q07020-2;Q07020	Q07020-2;Q07020	5	11	28.3				5	5	28.3	28.3	18.091	0	106.49	1239300000	1.30824	0.691645	1.20819	1.16664	1.22106	1.15613	1.23407	1.17168	-2.10138	-3.81691	1.676
RAE1	mRNA export factor	0.373882	-0.10258	0.931366	P78406	P78406	2	3	6.5				2	2	6.5	6.5	40.968	0	3.2744	136530000	-0.267435	-0.728672	-0.227299	-0.326651	-0.349052	-0.278536	-0.207563	-0.304585	-0.632903	-1.4318	0.727548
DNAJC11	DnaJ homolog subfamily C member 11	0.24457	-0.102738	0.931264	Q9NVH1-3;Q9NVH1-2;Q9NVH1	Q9NVH1-3;Q9NVH1-2;Q9NVH1	2	2	5.3				2	2	5.3	5.3	57.196	0	3.8638	19087000	-3.84098	-3.70893	-3.87029	-3.98603	-3.39511	-3.56005	-4.05952	-3.98059	-2.65955	-2.04574	-4.63338
CKAP4	Cytoskeleton-associated protein 4	0.95843	-0.103306	0.930897	Q07065	Q07065	17	38	41				17	17	41	41	66.022	0	105.93	2515300000	3.02229	3.10644	2.92534	2.95349	3.10667	3.1885	3.00634	3.11927	3.43914	5.77791	2.78964
UBTF	Nucleolar transcription factor 1	0.568408	-0.103821	0.930565	P17480-2;P17480	P17480-2;P17480	2	2	4.7				2	2	4.7	4.7	84.936	0	1.9817	51600000	-3.70073	-3.81903	-3.82529	-3.90635	-3.57181	-3.59175	-3.81184	-3.86073	-2.47784	-2.08516	-2.91425
HSPA1A	Heat shock 70 kDa protein 1A	1.56331	-0.104884	0.92988	P08107;P08107-2	P08107;P08107-2	27	204	71.3				49	49	71.3	45.9	70.051	0	323.31	122510000000	7.36373	7.48885	7.39027	7.42609	7.55924	7.56704	7.47279	7.48941	6.5416	5.27501	6.74978
RRBP1	Ribosome-binding protein 1	0.707029	-0.104895	0.929873	Q9P2E9-2;Q9P2E9;Q9P2E9-3;Q8N4C6-6;Q8N4C6-11;Q8N4C6-4;Q8N4C6-9;Q8N4C6-2;Q8N4C6;Q8N4C6-5;Q8N4C6-10;Q8N4C6-7	Q9P2E9-2;Q9P2E9;Q9P2E9-3	7	10	17.9				7	7	17.9	17.9	152.19	0	14.119	378930000	-0.182997	0.0920753	-0.0860939	0.0515614	0.0741463	-0.0245304	0.126486	0.118025	0.151052	0.955443	0.388085
SLC25A11	Mitochondrial 2-oxoglutarate/malate carrier protein	0.199574	-0.104959	0.929831	Q02978;Q02978-2	Q02978;Q02978-2	4	8	19.4				5	5	19.4	14.3	34.061	0	4.4663	31818000000	2.53481	1.75238	2.57174	2.58909	2.51269	2.40256	2.38993	2.56268	2.8269	3.22803	3.40025
RAP1A	Ras-related protein Rap-1A	1.47208	-0.106144	0.929068	P62834	P62834	2	6	41.3				5	5	41.3	21.2	20.987	0	10.016	1932400000	2.43069	2.33139	2.34439	2.26504	2.48126	2.46319	2.39595	2.45568	4.33637	9.8289	2.45268
POR	NADPH--cytochrome P450 reductase	0.561107	-0.106212	0.929024	P16435	P16435	3	3	4.7				3	3	4.7	4.7	76.689	0	3.2896	66383000	-2.24409	-1.88924	-2.16741	-2.05912	-1.86712	-1.97513	-2.071	-2.02176	-1.82909	-2.58182	-1.97776
CDK1	Cyclin-dependent kinase 1	0.541856	-0.107282	0.928336	P06493;P06493-2;P11802-2;Q07002;Q9NYV4;Q9NYV4-2;Q14004-2;Q9NYV4-3;Q00536-2;Q00537-2;Q00537;Q07002-3;Q00536-3;Q00536;P50750-2;Q07002-2;O94921;O94921-2;Q96Q40;Q96Q40-5;O94921-3;Q96Q40-3;Q96Q40-4;P50750;Q96Q40-2;Q00534;Q00526;Q00535;Q00535-2;Q14004	P06493;P06493-2	3	11	15.5				4	4	15.5	12.8	34.095	0	38.397	496610000	0.514797	0.0739002	0.29645	0.277899	0.384403	0.415615	0.436974	0.355181	1.62828	1.00219	0.988652
HSP90AA1	Heat shock protein HSP 90-alpha	1.07748	-0.107529	0.928176	P07900;P07900-2;Q14568;Q58FG0;Q58FG1;Q58FF6	P07900;P07900-2	20	40	48.8				31	20	32.5	32.5	84.659	0	75.284	5280200000	4.09494	3.99003	4.05984	4.02689	4.09894	4.07269	4.28298	4.14721	4.35715	4.11648	4.68364
ATAD1	ATPase family AAA domain-containing protein 1	0.5466	-0.108175	0.927761	Q8NBU5;Q8NBU5-2	Q8NBU5	3	4	8.6				3	3	8.6	8.6	40.744	0	3.908	382670000	0.925007	0.511007	0.778826	0.69026	0.851048	0.905191	0.755354	0.826208	-1.15993	-1.33618	0.428061
COPA	Coatomer subunit alpha;Xenin;Proxenin	0.988984	-0.108705	0.92742	P53621;P53621-2	P53621;P53621-2	12	19	11				12	12	11	11	138.34	0	26.971	1169800000	2.30422	2.08757	2.22622	2.22817	2.38737	2.35366	2.23032	2.30966	2.06166	0.455039	2.04879
PREP	Prolyl endopeptidase	0.618188	-0.109618	0.926833	P48147	P48147	2	2	3.7				2	2	3.7	3.7	80.699	0	2.0898	20653000	-2.48908	-2.45591	-2.59211	-2.39668	-2.32575	-2.28576	-2.59304	-2.29075	-5.14071	-0.0397711	-2.50502
ATP5B	ATP synthase subunit beta, mitochondrial	0.68347	-0.110009	0.926582	P06576	P06576	15	33	45.6				15	15	45.6	45.6	56.559	0	105.16	4501600000	3.35142	3.6428	3.44765	3.44745	3.6664	3.65472	3.46381	3.54442	2.43564	-1.43671	3.94118
RPS19	40S ribosomal protein S19	0.52822	-0.110156	0.926488	P39019	P39019	10	18	53.8				10	10	53.8	53.8	16.06	0	27.955	2140600000	2.84871	2.61736	2.93354	2.68748	2.84461	2.90051	3.04358	2.73903	2.61751	1.06638	3.73734
TRAP1	Heat shock protein 75 kDa, mitochondrial	0.810171	-0.110291	0.926401	Q12931-2;Q12931	Q12931-2;Q12931	10	15	20.1				10	10	20.1	20.1	74.267	0	21.838	859890000	1.62767	1.67298	1.8378	1.80688	1.92646	1.76418	1.92163	1.77423	-0.297812	-0.68999	2.33935
LPCAT1	Lysophosphatidylcholine acyltransferase 1	1.36369	-0.110466	0.926289	Q8NF37	Q8NF37	2	2	4.5				2	2	4.5	4.5	59.151	0	9.8208	134180000	-1.03576	-1.04394	-1.12091	-0.954571	-0.89703	-0.89665	-1.00787	-0.911776	NaN	NaN	-1.89063
IARS	Isoleucine--tRNA ligase, cytoplasmic	1.47596	-0.110596	0.926206	P41252	P41252	8	13	8.6				8	8	8.6	8.6	144.5	0	16.968	652290000	1.61763	1.5235	1.52429	1.53929	1.73159	1.70314	1.58834	1.62402	2.07518	1.73206	1.28086
COG5	Conserved oligomeric Golgi complex subunit 5	0.557211	-0.111315	0.925744	Q9UP83-2;Q9UP83;Q9UP83-3	Q9UP83-2;Q9UP83;Q9UP83-3	2	2	2.4				2	2	2.4	2.4	94.9	0	2.2924	58889000	-1.91659	-1.82582	-2.00225	-1.85133	-1.65575	-1.64024	-1.98806	-1.86668	-2.74978	NaN	-2.7978
UCHL5	Ubiquitin carboxyl-terminal hydrolase isozyme L5	0.874626	-0.112001	0.925304	Q9Y5K5-2;Q9Y5K5-4;Q9Y5K5-3;Q9Y5K5	Q9Y5K5-2;Q9Y5K5-4;Q9Y5K5-3;Q9Y5K5	2	4	8.9				2	2	8.9	8.9	36.079	0	4.6	138060000	-1.86498	-1.80434	-1.94665	-2.04681	-1.74002	-1.74182	-1.89024	-1.8427	-1.81189	NaN	-1.48715
USP7	Ubiquitin carboxyl-terminal hydrolase 7	0.438481	-0.112041	0.925278	Q93009-3;Q93009	Q93009-3;Q93009	2	2	2.9				2	2	2.9	2.9	126.27	0	3.3547	84258000	-1.89245	-1.68223	-2.09823	-1.8415	-1.63659	-1.65548	-1.81713	-1.95705	-2.95334	0.593004	-2.53683
REEP5	Receptor expression-enhancing protein 5	1.43795	-0.112164	0.9252	Q00765	Q00765	2	3	11.6				2	2	11.6	11.6	21.493	0.003406	1.2791	439430000	0.768698	0.725185	0.76667	0.703951	0.946766	0.85088	0.757448	0.858065	-0.109203	-0.239208	-0.236264
COX5A	Cytochrome c oxidase subunit 5A, mitochondrial	1.19684	-0.112452	0.925015	P20674	P20674	4	9	26				4	4	26	26	16.762	0	3.8723	1316700000	2.05491	2.02533	1.99135	1.90904	2.21174	2.08199	2.03013	2.10658	2.58457	0.0939207	2.1449
TMED10	Transmembrane emp24 domain-containing protein 10	0.766362	-0.113172	0.924553	P49755	P49755	2	4	8.7				2	2	8.7	8.7	24.976	0.0034795	1.3402	1384400000	2.10898	1.85765	2.10668	1.99819	2.23397	2.11208	2.03013	2.14799	1.87451	1.89858	2.07702
RPL36	60S ribosomal protein L36	1.07542	-0.113214	0.924526	Q9Y3U8	Q9Y3U8	3	7	20				3	3	20	20	12.254	0	5.4881	981520000	0.542824	0.412024	0.62462	0.514267	0.718643	0.582998	0.660107	0.584843	-0.181102	-0.164679	1.31913
DYNC1LI1	Cytoplasmic dynein 1 light intermediate chain 1	0.601622	-0.113336	0.924448	Q9Y6G9	Q9Y6G9	2	3	5.9				2	2	5.9	5.9	56.578	0	6.529	59777000	-1.2285	-1.57866	-1.37159	-1.29998	-1.19493	-1.15661	-1.3346	-1.33925	-1.88836	-1.66615	-1.52894
ITGB1	Integrin beta-1	0.386049	-0.113431	0.924387	P05556;P05556-2;P05556-5;P05556-4;P05556-3	P05556;P05556-2;P05556-5;P05556-4;P05556-3	4	3	6.4				4	4	6.4	6.4	88.414	0	4.1245	69814000	2.11231	1.60187	2.00222	2.07196	2.15673	2.11297	1.91633	2.05604	-3.65603	NaN	3.07544
LGALS3BP	Galectin-3-binding protein	1.24116	-0.113529	0.924324	Q08380	Q08380	17	43	36.2				17	17	36.2	36.2	65.33	0	84.381	6834600000	3.23901	3.14552	3.20758	3.19554	3.3972	3.18699	3.32046	3.33711	3.18569	1.80307	5.29502
MRPL18	39S ribosomal protein L18, mitochondrial	0.106065	-0.113673	0.924232	Q9H0U6	Q9H0U6	2	1	13.3				2	2	13.3	13.3	20.576	0.0051646	1.1165	39036000	-3.3351	-4.61405	-3.42324	-2.78259	-3.38737	-3.34842	-3.67931	-3.28518	NaN	NaN	-3.21421
ANKRD17	Ankyrin repeat domain-containing protein 17	0.666026	-0.113933	0.924065	O75179-4;O75179-6;O75179-7;O75179-2;O75179;O75179-5;O75179-3	O75179-4;O75179-6;O75179-7;O75179-2;O75179;O75179-5;O75179-3	2	2	1.5				2	2	1.5	1.5	210.59	0	3.1464	37518000	-2.98565	-2.90808	-3.09123	-3.12027	-2.78361	-2.81519	-3.0014	-3.04929	-4.09546	-3.01912	-3.21632
NCLN	Nicalin	0.509618	-0.11405	0.92399	Q969V3-2;Q969V3	Q969V3-2;Q969V3	8	14	16.5				8	8	16.5	16.5	62.846	0	16.897	598110000	1.25395	1.15356	1.11485	1.51488	1.36958	1.35933	1.26225	1.50228	1.47388	0.407809	0.951552
NUP93	Nuclear pore complex protein Nup93	0.735543	-0.114112	0.923951	Q8N1F7;Q8N1F7-2	Q8N1F7;Q8N1F7-2	6	11	8.8				6	6	8.8	8.8	93.487	0	7.8818	460580000	1.50933	1.31554	1.52854	1.60045	1.6763	1.62817	1.46992	1.63592	1.53671	0.671565	1.47695
UBR2	E3 ubiquitin-protein ligase UBR2	0.306294	-0.114872	0.923464	Q8IWV8-2;Q8IWV8-4;Q8IWV8	Q8IWV8-2;Q8IWV8-4;Q8IWV8	3	3	8.2				3	3	8.2	8.2	49.977	0	2.6248	171340000	-1.43685	-1.06133	-1.48808	-1.64787	-1.32642	-1.06754	-1.53669	-1.244	4.16562	5.89697	-0.479403
FANCI	Fanconi anemia group I protein	0.734043	-0.114898	0.923447	Q9NVI1-2;Q9NVI1-1;Q9NVI1	Q9NVI1-2;Q9NVI1-1;Q9NVI1	2	3	2.4				2	2	2.4	2.4	142.44	0	2.7813	181010000	-0.896582	-0.816467	-1.0179	-1.16549	-0.837496	-0.873177	-0.87693	-0.849243	-0.684852	-1.80578	-1.94301
RAB9A;RAB9B	Ras-related protein Rab-9A;Ras-related protein Rab-9B	0.954638	-0.115164	0.923277	P51151;Q9NP90	P51151;Q9NP90	2	3	12.9				2	2	12.9	12.9	22.837	0	6.3094	164210000	-0.0502739	-0.0289001	-0.153343	-0.00209618	0.189819	0.0829735	-0.048502	0.00175285	-4.73141	-0.468663	0.0699644
TOMM40	Mitochondrial import receptor subunit TOM40 homolog	0.495013	-0.115271	0.923209	O96008-2;O96008	O96008-2;O96008	2	3	13.1				2	2	13.1	13.1	34.441	0	8.6245	33936000	-4.0569	-4.09377	-4.34157	-3.93647	-3.9264	-3.86748	-4.16114	-4.0126	-3.62479	NaN	-4.99911
NDUFAF4	NADH dehydrogenase [ubiquinone] 1 alpha subcomplex assembly factor 4	0.726284	-0.115357	0.923154	Q9P032	Q9P032	2	4	8.6				2	2	8.6	8.6	20.266	0	2.8316	67188000	-1.81691	-1.75648	-1.89373	-1.82537	-1.66524	-1.5607	-1.90607	-1.69905	-0.967166	-2.2634	-2.1814
RPS4X;RPS4Y2	40S ribosomal protein S4, X isoform;40S ribosomal protein S4, Y isoform 2	1.64286	-0.115366	0.923148	P62701;Q8TD47;P22090	P62701;Q8TD47	18	24	53.6				18	18	53.6	53.6	29.597	0	27.926	4709000000	3.43074	3.47003	3.46025	3.37611	3.63268	3.55885	3.48505	3.52202	3.64826	3.79096	3.68339
IKBKAP	Elongator complex protein 1	0.858254	-0.116141	0.922652	O95163	O95163	4	5	5				4	4	5	5	150.25	0	9.7506	108560000	-0.98387	-0.949493	-1.10673	-1.06231	-0.856256	-0.776123	-1.0347	-0.970762	-0.421175	-1.37072	-1.06449
AP3D1	AP-3 complex subunit delta-1	0.857557	-0.116409	0.922481	O14617-3;O14617-4;O14617-2;O14617;O14617-5	O14617-3;O14617-4;O14617-2;O14617;O14617-5	2	2	3.5				2	2	3.5	3.5	111.24	0	3.4634	106880000	-0.397923	-0.505816	-0.313435	-0.537888	-0.444973	-0.283752	-0.235081	-0.325617	-0.379023	NaN	0.576459
BSG	Basigin	0.416738	-0.116499	0.922423	P35613-2;P35613;P35613-3;P35613-4	P35613-2;P35613;P35613-3;P35613-4	5	9	21.2				5	5	21.2	21.2	29.221	0	27.786	981720000	2.45984	2.8811	2.50831	2.37883	2.74354	2.77581	2.53667	2.63806	3.01535	1.9603	2.10239
SLC25A13	Calcium-binding mitochondrial carrier protein Aralar2	0.98863	-0.117212	0.921968	Q9UJS0;Q9UJS0-2	Q9UJS0;Q9UJS0-2	3	8	10.2				4	4	10.2	8.4	74.175	0	30.879	679640000	1.03596	0.96665	0.89817	0.839521	1.01859	1.16273	0.956568	1.07125	0.260239	1.77679	0.318809
HSD17B12	Very-long-chain 3-oxoacyl-CoA reductase	0.739776	-0.117322	0.921897	Q53GQ0;Q53GQ0-2	Q53GQ0	4	6	14.7				4	4	14.7	14.7	34.324	0	7.0651	1212000000	1.53063	1.26191	1.27911	1.51825	1.52728	1.56079	1.44161	1.52951	0.877342	NaN	0.998038
MYCBP	C-Myc-binding protein	0.439235	-0.117558	0.921747	Q99417	Q99417	2	2	18.4				2	2	18.4	18.4	11.967	0.00076336	1.7178	93104000	-2.42346	-2.9639	-2.69059	-2.59258	-2.4955	-2.51986	-2.6656	-2.51934	-3.40293	NaN	-2.65482
XPO1	Exportin-1	0.78352	-0.11764	0.921694	O14980	O14980	19	41	25				19	19	25	25	123.38	0	161.4	6532700000	4.2012	3.92767	4.05044	4.1034	4.16583	4.27671	4.06357	4.24717	3.82148	2.80233	3.00067
SNX9	Sorting nexin-9	0.760072	-0.117984	0.921474	Q9Y5X1	Q9Y5X1	3	5	7.4				3	3	7.4	7.4	66.591	0	25.281	414470000	2.16058	2.25718	2.11949	1.99435	2.16046	2.39306	2.17583	2.27419	2.46731	0.970938	2.394
FDFT1	Squalene synthase	0.411706	-0.118455	0.921174	P37268-5;P37268;P37268-2;P37268-4;P37268-3	P37268-5;P37268;P37268-2	7	11	22.2				7	7	22.2	22.2	43.06	0	18.288	220400000	-0.50046	-0.94924	-0.59823	-0.412077	-0.400005	-0.485537	-0.629427	-0.471218	-0.818383	-1.59754	-0.922574
YIPF5	Protein YIPF5	0.860851	-0.119675	0.920395	Q969M3;Q969M3-3	Q969M3;Q969M3-3	2	4	18.7				2	2	18.7	18.7	27.989	0	23.127	287360000	-1.20312	-1.3736	-1.43669	-1.33913	-1.21314	-1.15845	-1.35995	-1.1423	NaN	-3.05026	-3.2178
PSMC2	26S protease regulatory subunit 7	1.75639	-0.120698	0.919742	P35998;P35998-2	P35998;P35998-2	14	21	37.4				14	14	37.4	37.4	48.633	0	99.893	889260000	2.34158	2.3349	2.24772	2.29177	2.44991	2.49341	2.35404	2.4014	1.48129	2.73667	2.13682
SYNJ2BP	Synaptojanin-2-binding protein	0.525075	-0.121465	0.919254	P57105	P57105	2	2	19.3				2	2	19.3	19.3	15.928	0	3.7466	82663000	-1.18862	-1.36771	-1.29452	-1.29067	-0.980188	-1.00105	-1.34402	-1.33041	-0.632632	-1.31463	-1.64756
MTHFD1	C-1-tetrahydrofolate synthase, cytoplasmic;Methylenetetrahydrofolate dehydrogenase;Methenyltetrahydrofolate cyclohydrolase;Formyltetrahydrofolate synthetase;C-1-tetrahydrofolate synthase, cytoplasmic, N-terminally processed	1.40365	-0.121868	0.918997	P11586	P11586	18	32	22.7				19	19	22.7	21.6	101.56	0	67.786	1987400000	2.5636	2.65963	2.58953	2.66873	2.75481	2.68751	2.84646	2.68017	3.2804	2.74137	3.12691
SH3GLB2	Endophilin-B2	0.953862	-0.122272	0.91874	Q9NR46;Q9NR46-2	Q9NR46;Q9NR46-2	2	2	8.6				3	2	6.6	6.6	43.973	0	6.0431	73547000	-2.49714	-2.46737	-2.51327	-2.55479	-2.24627	-2.34503	-2.40512	-2.54706	-1.86953	NaN	-2.31772
HADHA	Trifunctional enzyme subunit alpha, mitochondrial;Long-chain enoyl-CoA hydratase;Long chain 3-hydroxyacyl-CoA dehydrogenase	1.55261	-0.12292	0.918327	P40939;P40939-2	P40939	12	17	20.1				12	12	20.1	20.1	82.999	0	39.055	995490000	1.86447	1.78848	1.88141	1.94415	2.03907	2.02809	1.91448	1.98854	1.79286	-0.852676	1.77718
CHP1	Calcineurin B homologous protein 1	0.602551	-0.123752	0.917798	Q99653	Q99653	2	2	18.5				2	2	18.5	18.5	22.456	0	3.5242	27610000	-1.63793	-1.7106	-1.63812	-1.46622	-1.51384	-1.26922	-1.66672	-1.50807	0.748354	2.07896	-4.68483
2007-09-01	Septin-7	0.258944	-0.124897	0.91707	Q16181-2;Q16181	Q16181-2;Q16181	2	3	5				2	2	5	5	50.58	0.004522	1.117	97935000	-0.918266	-1.45293	-0.554932	-0.989223	-0.954014	-0.959146	-0.654562	-0.848038	-0.0811872	NaN	0.282556
ATP2C1	Calcium-transporting ATPase type 2C member 1	0.713518	-0.125594	0.916626	P98194-2;P98194-4;P98194;P98194-3;P98194-5;P98194-8;P98194-9;P98194-6;P98194-7	P98194-2;P98194-4;P98194;P98194-3;P98194-5;P98194-8;P98194-9;P98194-6;P98194-7	3	3	6.3				3	3	6.3	6.3	96.959	0	6.9139	52753000	-2.58332	-2.5988	-2.84142	-2.72054	-2.54821	-2.47138	-2.73668	-2.48544	-2.87689	-4.25824	-3.02396
AGO2	Protein argonaute-2	0.553892	-0.125915	0.916423	Q9UKV8-2;Q9UKV8	Q9UKV8-2;Q9UKV8	4	11	8.8				7	7	8.8	4.4	93.619	0	14.488	796040000	1.63543	1.31087	1.62297	1.52499	1.77748	1.77345	1.48212	1.56488	1.30202	2.39334	1.83282
HK2	Hexokinase-2	0.78478	-0.126475	0.916067	P52789	P52789	3	6	4.5				3	3	4.5	4.5	102.38	0	8.6313	150930000	-0.866381	-0.710772	-1.02384	-0.831264	-0.759144	-0.612293	-0.837795	-0.717119	-1.25672	1.35999	-1.10142
SCYL1	N-terminal kinase-like protein	0.55786	-0.126499	0.916052	Q96KG9-5;Q96KG9-3;Q96KG9-4;Q96KG9-6;Q96KG9-2;Q96KG9	Q96KG9-5;Q96KG9-3;Q96KG9-4;Q96KG9-6;Q96KG9-2;Q96KG9	2	2	4.8				2	2	4.8	4.8	69.237	0	3.1057	21136000	-3.81064	-4.15288	-3.75174	-3.76971	-3.72002	-3.69922	-3.67621	-3.88352	NaN	-2.95688	-4.58694
SURF4	Surfeit locus protein 4	0.421287	-0.127043	0.915706	O15260-3;O15260-2;O15260	O15260-3;O15260-2;O15260	2	10	20.3				2	2	20.3	20.3	14.854	0	25.201	291880000	0.242256	0.268122	-0.10099	0.177425	0.356493	0.4863	-0.0024929	0.254686	-0.915875	0.636912	-1.09359
PSMC3	26S protease regulatory subunit 6A	2.18079	-0.127171	0.915625	P17980	P17980	9	10	32.3				9	9	32.3	32.3	49.203	0	52.056	815310000	2.20179	2.19175	2.15161	2.18934	2.26975	2.3422	2.25414	2.3771	1.89578	0.0765276	2.35538
SLC25A5	ADP/ATP translocase 2;ADP/ATP translocase 2, N-terminally processed	0.575708	-0.127802	0.915225	P05141;Q9H0C2	P05141	10	51	61.4				25	25	61.4	32.6	32.852	0	87.2	35073000000	5.57783	5.83681	5.56996	5.37395	5.71514	5.80986	5.60399	5.74078	4.75354	2.28687	4.47796
ITGB6	Integrin beta-6	0.137431	-0.12784	0.915201	P18564-2;P18564	P18564-2;P18564	2	2	2.9				2	2	2.9	2.9	74.957	0.0097859	0.96353	8596900	-2.15242	-2.91899	-1.50215	-1.49688	-1.83255	-2.16782	-1.85745	-1.70126	-1.46888	-4.03371	-2.35094
VAPA	Vesicle-associated membrane protein-associated protein A	0.846784	-0.128209	0.914967	Q9P0L0;Q9P0L0-2	Q9P0L0;Q9P0L0-2	5	8	28.5				5	5	28.5	28.5	27.893	0	11.677	332950000	0.743668	0.557131	0.688099	0.708117	0.934328	0.887423	0.669476	0.718624	-0.493549	-0.83494	-0.0822649
RPS6	40S ribosomal protein S6	1.0757	-0.128806	0.914588	P62753	P62753	13	26	44.2				13	13	44.2	44.2	28.68	0	27.78	6169900000	3.54741	3.39103	3.61246	3.40959	3.59518	3.59873	3.71168	3.57012	4.21409	1.63981	4.61609
TPR	Nucleoprotein TPR	0.239979	-0.12899	0.914471	P12270;P12270-2	P12270	3	2	1.4				3	3	1.4	1.4	267.29	0	20.323	19606000	-5.38209	-5.3985	-5.27299	-5.82495	-5.36698	-4.9499	-5.22932	-5.81637	NaN	-5.25388	-4.1362
HSPBP1	Hsp70-binding protein 1	1.08295	-0.129117	0.914391	Q9NZL4-2;Q9NZL4;Q9NZL4-3	Q9NZL4-2;Q9NZL4;Q9NZL4-3	4	5	19.3				4	4	19.3	19.3	28.024	0	44.165	251260000	-1.15968	-1.09185	-1.28061	-1.28101	-1.14401	-1.03978	-1.13757	-0.975315	-2.82742	0.337075	-1.6489
AGPS	Alkyldihydroxyacetonephosphate synthase, peroxisomal	0.527737	-0.130095	0.913771	O00116	O00116	2	2	3.2				2	2	3.2	3.2	72.911	0	1.9209	142310000	-1.34857	-1.59119	-1.13258	-1.2045	-1.0759	-1.18149	-1.32862	-1.17045	-1.52667	NaN	-1.0344
VAPB	Vesicle-associated membrane protein-associated protein B/C	0.865862	-0.130262	0.913666	O95292;O95292-2	O95292;O95292-2	3	8	19.8				4	4	19.8	18.9	27.228	0	6.3595	354900000	1.26333	1.2038	1.1981	1.18512	1.49449	1.43164	1.1706	1.27466	0.807025	2.65021	0.565158
AP2B1;AP1B1	AP-2 complex subunit beta;AP-1 complex subunit beta-1	1.36078	-0.132097	0.912504	P63010-3;P63010;P63010-2;Q10567-4;Q10567-3;Q10567-2;Q10567	P63010-3;P63010;P63010-2;Q10567-4;Q10567-3;Q10567-2;Q10567	3	3	3.9				3	3	3.9	3.9	98.117	0	3.9404	173990000	-1.6439	-1.87892	-1.6931	-1.73891	-1.61398	-1.57321	-1.62024	-1.61902	-0.255574	-0.79474	-0.745894
RAB11A;RAB11B	Ras-related protein Rab-11A;Ras-related protein Rab-11B	1.52926	-0.132243	0.912412	P62491-2;Q15907-2;P62491;Q15907;P57735	P62491-2;Q15907-2;P62491;Q15907	8	18	49				8	8	49	49	17.659	0	24.471	2364500000	2.13932	2.08641	2.18591	2.1343	2.36937	2.30605	2.20257	2.19693	2.71325	2.56112	2.36832
NDUFB10	NADH dehydrogenase [ubiquinone] 1 beta subcomplex subunit 10	1.46564	-0.132452	0.91228	O96000;O96000-2	O96000;O96000-2	5	7	38.4				5	5	38.4	38.4	20.776	0	7.4177	287470000	-0.012825	-0.17819	0	-0.052063	0.124487	0.0901241	0.0730953	-0.00097847	-0.44801	1.20564	0.354049
RPL27	60S ribosomal protein L27	0.708956	-0.134373	0.911066	P61353	P61353	4	5	38.2				4	4	38.2	38.2	15.798	0	8.0952	2346800000	2.57407	2.33503	2.6308	2.69546	2.76252	2.74659	2.55199	2.71175	1.66452	NaN	3.26436
NCAPG	Condensin complex subunit 3	1.50128	-0.134429	0.91103	Q9BPX3	Q9BPX3	3	4	3.7				3	3	3.7	3.7	114.33	0	5.373	82808000	-2.17901	-2.05079	-2.12054	-2.00807	-1.90494	-2.0133	-2.00021	-1.90224	-4.78225	-1.30332	-2.04093
COPE	Coatomer subunit epsilon	0.96925	-0.13492	0.910721	O14579-3;O14579;O14579-2	O14579-3;O14579;O14579-2	4	4	18.8				4	4	18.8	18.8	28.772	0	5.8712	72915000	-1.11963	-1.37035	-1.18766	-1.0986	-1.00684	-0.991934	-1.13952	-1.09827	0.38729	0.786804	-2.01376
RPL7A	60S ribosomal protein L7a	0.778086	-0.134979	0.910683	P62424	P62424	13	22	53.4				13	13	53.4	53.4	29.995	0	26.739	5359000000	4.44647	4.09208	4.42762	4.36588	4.52752	4.48589	4.41349	4.44505	3.34548	2.06589	4.67542
PSMD14	26S proteasome non-ATPase regulatory subunit 14	1.45961	-0.13554	0.910329	O00487	O00487	3	4	10.3				3	3	10.3	10.3	34.577	0	11.576	461900000	0.554424	0.573942	0.425873	0.392941	0.570391	0.65885	0.652279	0.607822	1.49552	1.35882	0.829263
UBAP2L	Ubiquitin-associated protein 2-like	1.30585	-0.13609	0.909982	Q14157-1;Q14157-3;Q14157;Q14157-5;Q14157-4	Q14157-1;Q14157-3;Q14157;Q14157-5;Q14157-4	7	18	11.2				7	7	11.2	11.2	103.93	0	38.549	869280000	1.73329	1.80709	1.70321	1.57315	1.80942	1.9144	1.79762	1.83966	0.867832	-0.53651	2.55786
UNC45A	Protein unc-45 homolog A	1.43544	-0.136831	0.909515	Q9H3U1-2;Q9H3U1;Q9H3U1-3	Q9H3U1-2;Q9H3U1	9	18	14.2				10	10	14.2	13	101.67	0	17.298	551130000	2.19954	2.01938	2.09599	2.1643	2.30859	2.31083	2.18015	2.22697	1.44072	1.91922	2.21244
NDUFS7	NADH dehydrogenase [ubiquinone] iron-sulfur protein 7, mitochondrial	0.318063	-0.137216	0.909272	O75251-2;O75251	O75251-2;O75251	2	2	10.2				2	2	10.2	10.2	22.202	0.0028349	1.4226	109950000	0.309799	-0.286469	0.35181	0.518148	0.486103	0.374947	0.33226	0.248842	2.14729	2.59649	-0.599433
RPS2	40S ribosomal protein S2	1.5004	-0.137217	0.909272	P15880	P15880	15	36	54.3				15	15	54.3	54.3	31.324	0	65.29	14559000000	5.79312	5.68396	5.6915	5.64357	5.83518	5.90062	5.73616	5.88905	5.51842	5.41908	5.34796
CANX	Calnexin	1.56177	-0.137717	0.908957	P27824-2;P27824;P27824-3	P27824-2;P27824;P27824-3	6	12	9.4				6	6	9.4	9.4	71.502	0	18.084	2744600000	2.37844	2.45321	2.26502	2.31745	2.54603	2.51831	2.43737	2.46327	1.80927	2.264	2.35303
EXOC8	Exocyst complex component 8	1.70907	-0.138009	0.908772	Q8IYI6	Q8IYI6	2	5	2.8				2	2	2.8	2.8	81.798	0	1.906	72490000	-2.1871	-2.34896	-2.25433	-2.31828	-2.15068	-2.12413	-2.20021	-2.08161	-4.3698	-3.66084	-1.79599
SLC38A2	Sodium-coupled neutral amino acid transporter 2	0.447351	-0.138131	0.908696	Q96QD8	Q96QD8	2	2	9.1				2	2	9.1	9.1	56.025	0	82.173	35090000	-3.65263	-3.40966	-3.80881	-3.83698	-3.42257	-3.36686	-3.80622	-3.55989	-3.85358	NaN	-4.08503
UQCRH	Cytochrome b-c1 complex subunit 6, mitochondrial	0.855065	-0.138678	0.908351	P07919	P07919	3	5	22				3	3	22	22	10.739	0	3.1647	437380000	0.833817	0.604797	0.625078	0.494507	0.660946	0.831158	0.79007	0.830736	0.752168	-2.56127	0.13794
COX6C	Cytochrome c oxidase subunit 6C	1.41618	-0.138796	0.908277	P09669	P09669	3	3	24				3	3	24	24	8.7813	0	4.0256	362470000	0.105131	0.0927505	0.0244408	-0.0593014	0.27334	0.193113	0.101274	0.150478	0.677216	-3.21475	0.443631
XXYLT1	Xyloside xylosyltransferase 1	0.550857	-0.139374	0.907913	Q8NBI6;Q8NBI6-3;Q8NBI6-2	Q8NBI6;Q8NBI6-3;Q8NBI6-2	4	6	14.2				4	4	14.2	14.2	43.806	0	5.4773	655820000	1.31545	1.5685	1.24581	1.38084	1.54164	1.74457	1.28028	1.50159	2.31646	2.82648	0.969453
AQR	Intron-binding protein aquarius	0.814069	-0.140044	0.907492	O60306	O60306	2	1	2.4				2	2	2.4	2.4	171.29	0	2.6734	10595000	-4.80399	-4.91373	-4.84999	-4.62988	-4.73476	-4.50466	-4.77326	-4.62473	-5.17281	NaN	-4.28665
RAB2A	Ras-related protein Rab-2A	1.22426	-0.140885	0.906963	P61019-2;P61019	P61019-2;P61019	2	14	36.2				5	5	36.2	16	20.847	0	30.85	426660000	1.14524	1.13817	1.08177	1.14709	1.39587	1.34083	1.15514	1.18396	0.841894	-1.32186	1.16912
TMEM38B	Trimeric intracellular cation channel type B	0.895211	-0.14097	0.906909	Q9NVV0	Q9NVV0	2	2	11.7				2	2	11.7	11.7	32.509	0	4.7369	39128000	-2.1056	-2.04776	-2.00514	-1.99623	-1.80585	-1.7491	-2.08604	-1.94986	0.648438	1.80757	-2.7945
SLC25A12	Calcium-binding mitochondrial carrier protein Aralar1	0.710771	-0.141105	0.906824	O75746-2;O75746	O75746-2;O75746	3	3	11.4				4	3	9.3	9.3	62.72	0	6.8119	118660000	0.559664	0.51289	0.772673	0.611725	0.898346	0.88373	0.620926	0.61837	NaN	-0.397494	-2.29687
SEC13	Protein SEC13 homolog	0.992391	-0.14125	0.906733	P55735;P55735-2;P55735-3	P55735;P55735-2;P55735-3	3	6	22				4	4	22	14	35.54	0	8.7229	131410000	-1.17116	-1.44271	-1.25044	-1.12763	-1.07896	-1.06374	-1.16216	-1.12208	-0.874084	-2.36606	-1.75961
SLC1A5	Neutral amino acid transporter B(0)	0.654784	-0.141455	0.906604	Q15758;Q15758-3;Q15758-2	Q15758;Q15758-3;Q15758-2	3	7	13.3				4	4	13.3	11.5	56.598	0	23.291	612610000	0.657354	0.296869	0.660143	0.578739	0.774405	0.761972	0.522526	0.700024	1.82807	2.84648	0.10575
IPO9	Importin-9	1.2034	-0.142807	0.905755	Q96P70	Q96P70	10	13	13.3				10	10	13.3	13.3	115.96	0	19.876	1200900000	2.21523	1.97095	2.12181	2.15822	2.28528	2.32165	2.16123	2.26928	1.86568	0.223661	2.20706
VPS52	Vacuolar protein sorting-associated protein 52 homolog	0.558121	-0.143557	0.905284	Q8N1B4;Q8N1B4-2	Q8N1B4;Q8N1B4-2	3	2	7.3				3	3	7.3	7.3	82.22	0	3.4694	28787000	-2.8963	-3.29443	-3.05124	-2.78703	-2.98097	-2.8842	-2.7509	-2.8387	NaN	NaN	-2.88308
TUBG2;TUBG1	Tubulin gamma-2 chain;Tubulin gamma-1 chain	1.04867	-0.144172	0.904899	Q9NRH3;P23258	Q9NRH3;P23258	3	4	7.8				3	3	7.8	7.8	51.091	0	12.35	134950000	-1.17129	-0.977713	-1.13225	-0.91037	-0.854603	-0.835079	-0.944761	-0.980494	-1.83529	-0.735212	-0.743638
FAR1	Fatty acyl-CoA reductase 1	0.90968	-0.145331	0.904172	Q8WVX9	Q8WVX9	4	8	13				5	5	13	11.1	59.356	0	7.2467	238650000	0.336601	0.367241	0.16325	0.305286	0.494829	0.570232	0.254427	0.434214	-0.900723	-0.141924	-0.827058
TRABD	TraB domain-containing protein	1.51421	-0.145923	0.903801	Q9H4I3;Q9H4I3-2	Q9H4I3;Q9H4I3-2	2	3	7.2				2	2	7.2	7.2	42.321	0	3.9114	37662000	-2.64171	-2.5197	-2.60628	-2.59758	-2.31426	-2.47166	-2.51971	-2.47594	-1.78379	-4.77685	-3.80542
NCAPH	Condensin complex subunit 2	1.18382	-0.146213	0.90362	Q15003;Q15003-2	Q15003;Q15003-2	8	10	14.6				8	8	14.6	14.6	82.562	0	35.409	374280000	0.636675	0.407143	0.575031	0.66466	0.755037	0.753511	0.628836	0.730974	0.684973	-0.744113	0.536841
ARF3;ARF1	ADP-ribosylation factor 3;ADP-ribosylation factor 1	0.795705	-0.147149	0.903033	P61204-2;P61204;P84077	P61204-2;P61204;P84077	3	5	26.4				3	3	26.4	26.4	16.145	0	3.8581	203500000	0.24415	0.0525913	0.196842	0.14604	0.207764	0.53944	0.30467	0.176344	1.07153	0.182701	0.627473
UQCRC2	Cytochrome b-c1 complex subunit 2, mitochondrial	0.25627	-0.147165	0.903023	P22695	P22695	7	10	17.7				7	7	17.7	17.7	48.442	0	15.283	750790000	1.19643	0.518616	1.48092	1.30256	1.32121	0.962624	1.40953	1.39383	0.825169	-1.31304	0.915656
LRRC59	Leucine-rich repeat-containing protein 59	1.17535	-0.148134	0.902417	Q96AG4	Q96AG4	8	14	26.1				8	8	26.1	26.1	34.93	0	13.731	2975100000	3.36304	3.21641	3.43875	3.40953	3.63442	3.48547	3.4628	3.43758	4.34124	4.98303	3.02389
RPL17	60S ribosomal protein L17	1.64938	-0.148268	0.902333	P18621-3;P18621;P18621-2	P18621-3;P18621;P18621-2	9	13	35.1				9	9	35.1	35.1	26.372	0	28.988	1923900000	3.32738	3.18241	3.29141	3.19424	3.47436	3.34041	3.34486	3.42889	2.50177	-0.380153	3.52404
UPF1	Regulator of nonsense transcripts 1	0.540228	-0.148487	0.902196	Q92900-2;Q92900	Q92900-2;Q92900	3	6	3.2				3	3	3.2	3.2	123.03	0	5.423	60386000	-2.86714	-2.62329	-2.79723	-2.76081	-2.74673	-2.2658	-2.69213	-2.74986	-3.84986	-1.69755	-1.6847
VDAC3	Voltage-dependent anion-selective channel protein 3	1.7812	-0.148792	0.902006	Q9Y277;Q9Y277-2	Q9Y277;Q9Y277-2	11	13	37.8				11	11	37.8	37.8	30.658	0	30.055	1808100000	3.13416	3.14418	3.11386	3.25	3.39914	3.32039	3.25252	3.26532	3.15515	1.77806	1.78836
RPAP1	RNA polymerase II-associated protein 1	0.688026	-0.149018	0.901864	Q9BWH6;Q9BWH6-2;Q9BWH6-3	Q9BWH6;Q9BWH6-2	3	2	2.7				3	3	2.7	2.7	152.75	0	3.4815	32657000	-2.48228	-2.7788	-2.46257	-2.39311	-2.52488	-2.28445	-2.43686	-2.27449	-1.3834	-2.87931	-2.09619
ZMPSTE24	CAAX prenyl protease 1 homolog	0.664657	-0.14908	0.901825	O75844	O75844	2	2	1.9				2	2	1.9	1.9	54.812	0.00074294	1.6178	93023000	-2.94322	-2.79388	-2.9231	-2.72271	-2.41415	-2.79706	-2.78502	-2.79036	-3.10801	-2.14441	-2.60996
EIF4G1	Eukaryotic translation initiation factor 4 gamma 1	3.63221	-0.149503	0.901561	Q04637-6;Q04637-7;Q04637-5;Q04637-4;Q04637-3;Q04637;Q04637-8;Q04637-9	Q04637-6;Q04637-7;Q04637-5;Q04637-4;Q04637-3;Q04637;Q04637-8;Q04637-9	15	38	18.5				20	20	18.5	14.9	154.8	0	57.081	2071400000	2.51994	2.56044	2.5588	2.58702	2.7252	2.70162	2.72716	2.67024	2.7999	1.89355	2.57739
PSMD13	26S proteasome non-ATPase regulatory subunit 13	1.34282	-0.151248	0.900471	Q9UNM6;Q9UNM6-2	Q9UNM6;Q9UNM6-2	6	9	18.9				6	6	18.9	18.9	42.945	0	16.383	426380000	0.678137	0.526909	0.773645	0.775331	0.844954	0.838778	0.804083	0.871201	-1.48821	0.499708	0.893237
UFL1	E3 UFM1-protein ligase 1	1.86472	-0.151558	0.900278	O94874;O94874-2;O94874-3	O94874;O94874-2;O94874-3	4	4	5				4	4	5	5	89.594	0	5.3071	244610000	-1.15917	-1.30268	-1.18377	-1.17198	-1.04239	-1.03008	-1.13583	-1.00304	-0.39162	-0.00794888	-1.67759
TUBGCP2	Gamma-tubulin complex component 2	1.32606	-0.151768	0.900147	Q9BSJ2-4;Q9BSJ2;Q9BSJ2-3	Q9BSJ2-4;Q9BSJ2;Q9BSJ2-3	3	4	4.4				3	3	4.4	4.4	105.63	0	5.2229	154180000	-0.198359	-0.141542	-0.232145	-0.151392	0	0.105703	-0.169367	-0.052702	1.75626	3.17721	-1.46578
PSMD4	26S proteasome non-ATPase regulatory subunit 4	1.0344	-0.152235	0.899855	P55036-2;P55036	P55036-2;P55036	3	4	22				3	3	22	22	28.612	0	13.992	145570000	-1.66735	-1.51185	-1.75688	-1.58324	-1.47034	-1.33767	-1.60316	-1.4992	-2.49496	-3.41641	-0.909129
ZW10	Centromere/kinetochore protein zw10 homolog	0.701504	-0.152483	0.899701	O43264-2;O43264	O43264-2;O43264	6	6	14				6	6	14	14	76.806	0	18.424	148220000	1.05014	0.742117	0.938522	0.896574	1.17803	1.19684	0.83325	1.02916	1.12075	-0.150409	0.960286
TNRC6C	Trinucleotide repeat-containing gene 6C protein	0.839338	-0.1525	0.89969	Q9HCJ0;Q9HCJ0-2	Q9HCJ0;Q9HCJ0-2	5	9	5.7				6	5	5	5	175.96	0	11.226	380580000	0.816055	0.558197	0.728878	0.821404	1.00322	0.990393	0.733259	0.807657	1.8782	2.97777	1.22972
YWHAG	14-3-3 protein gamma;14-3-3 protein gamma, N-terminally processed	0.124802	-0.152769	0.899522	P61981	P61981	3	5	23.5				5	3	13.8	13.8	28.302	0	5.4232	299490000	1.36173	-0.333466	1.53073	1.52032	1.17115	1.00387	1.16266	1.3527	0.716308	1.76791	1.53657
PEX11B	Peroxisomal membrane protein 11B	1.38081	-0.155974	0.897526	O96011-2;O96011	O96011-2;O96011	3	4	13.1				3	3	13.1	13.1	26.724	0	3.0065	249130000	0.183296	0.126072	0.0583839	0.0441666	0.205153	0.37855	0.148705	0.30341	0.362284	0.101202	-0.460389
RPS27A;UBB;UBC	Ubiquitin-40S ribosomal protein S27a;Ubiquitin;40S ribosomal protein S27a;Polyubiquitin-B;Ubiquitin;Polyubiquitin-C;Ubiquitin	1.09567	-0.156243	0.897359	P62979;P0CG47;P0CG48	P62979;P0CG47;P0CG48	3	22	55.1				9	9	55.1	19.9	17.965	0	90.602	1128300000	2.39702	2.0878	2.30657	2.27572	2.44301	2.48656	2.3192	2.44332	4.00304	4.93768	3.64264
RPL32	60S ribosomal protein L32	0.3559	-0.157929	0.896311	P62910	P62910	5	11	32.6				5	5	32.6	32.6	15.86	0	5.6265	2686300000	4.02211	3.9555	4.17094	4.20478	4.60471	4.51393	3.95082	3.91558	4.03496	3.57743	4.28847
RPL26;RPL26L1	60S ribosomal protein L26;60S ribosomal protein L26-like 1	0.794476	-0.158032	0.896247	P61254;Q9UNX3	P61254;Q9UNX3	6	5	33.8				6	6	33.8	33.8	17.258	0	4.0042	298120000	1.53952	1.19485	1.64173	1.41617	1.64246	1.58784	1.64236	1.55173	-0.299583	NaN	2.14998
ACSL3	Long-chain-fatty-acid--CoA ligase 3	1.86739	-0.158381	0.89603	O95573;O60488-2;O60488	O95573	6	8	12.5				6	6	12.5	12.5	80.419	0	10.981	303830000	0.141096	0.0439167	0.150091	0.197218	0.347097	0.340899	0.209274	0.268574	-0.332561	0.907866	0.0439959
NCAPD3	Condensin-2 complex subunit D3	1.05529	-0.160081	0.894975	P42695	P42695	2	2	1.2				2	2	1.2	1.2	168.89	0.000757	1.6938	105270000	-1.31659	-1.16683	-1.38733	-1.44628	-1.20431	-1.04488	-1.28441	-1.1431	-2.08071	NaN	-1.39465
PRMT5	Protein arginine N-methyltransferase 5;Protein arginine N-methyltransferase 5, N-terminally processed	0.17299	-0.160637	0.89463	O14744-4;O14744-2;O14744;O14744-3;O14744-5	O14744-4;O14744-2;O14744;O14744-3;O14744-5	3	3	9				3	3	9	9	53.579	0	3.8504	132260000	-0.0284634	-1.2286	0.0986252	0.4077	-0.0640411	-0.0923729	-0.0119915	0.0602188	0.742628	-0.526061	0.445725
TMED9	Transmembrane emp24 domain-containing protein 9	0.937768	-0.16269	0.893358	Q9BVK6	Q9BVK6	3	9	17.4				4	4	17.4	10.2	27.277	0	61.804	293400000	-0.528643	-0.739346	-0.634157	-0.430962	-0.274446	-0.419649	-0.559422	-0.428831	-0.342929	-1.64326	-0.550189
CNBP	Cellular nucleic acid-binding protein	1.53211	-0.163049	0.893136	P62633-7;P62633-3;P62633-2;P62633-8;P62633-5;P62633;P62633-4;P62633-6	P62633-7;P62633-3;P62633-2;P62633-8;P62633-5;P62633;P62633-4;P62633-6	3	8	18.8				3	3	18.8	18.8	17.692	0	5.1532	266730000	0.312302	0.234846	0.394962	0.287859	0.37912	0.600779	0.450459	0.451807	-0.224648	-6.48986	0.808347
LMAN2	Vesicular integral-membrane protein VIP36	0.598478	-0.16401	0.892541	Q12907	Q12907	2	2	9.6				2	2	9.6	9.6	40.228	0	2.7982	201110000	-1.23905	-1.54711	-1.2649	-1.04972	-0.922487	-1.06144	-1.29499	-1.16582	NaN	NaN	-2.07903
RPL23	60S ribosomal protein L23	2.34561	-0.164912	0.891983	P62829	P62829	5	14	32.9				5	5	32.9	32.9	14.865	0	42.621	4555000000	2.8358	2.88297	2.76507	2.81229	2.97329	3.07109	2.94267	2.96873	5.99667	7.58883	2.60862
SRPR	Signal recognition particle receptor subunit alpha	1.17954	-0.165386	0.89169	P08240-2;P08240	P08240-2;P08240	6	8	15.2				6	6	15.2	15.2	66.558	0	47.221	468850000	0.136971	0.256714	0.36549	0.443661	0.558975	0.436138	0.420475	0.44879	-1.82931	1.38695	0.224242
PSMD2	26S proteasome non-ATPase regulatory subunit 2	2.51112	-0.165867	0.891392	Q13200;Q13200-3;Q13200-2	Q13200;Q13200-3;Q13200-2	6	9	9.6				6	6	9.6	9.6	100.2	0	54.914	594780000	0.925915	0.902945	0.851332	0.801039	1.03592	1.06775	0.977596	1.06343	0.758554	0.148705	0.924026
PFKL	ATP-dependent 6-phosphofructokinase, liver type	0.954799	-0.166696	0.890881	P17858;P17858-2;P08237-2;P08237;P08237-3	P17858;P17858-2	3	3	9				6	4	5.4	4.5	85.018	0	2.6115	109490000	-1.46926	-1.77738	-1.50072	-1.38704	-1.28902	-1.36307	-1.40819	-1.40734	-1.78717	NaN	-2.22619
SEC23IP	SEC23-interacting protein	1.80705	-0.16699	0.890699	Q9Y6Y8-2;Q9Y6Y8	Q9Y6Y8-2;Q9Y6Y8	8	11	10.4				8	8	10.4	10.4	102.19	0	10.125	467960000	0.945999	1.07816	0.879715	0.975328	1.19589	1.1543	1.06112	1.13585	0.542583	-0.543326	1.08369
SCCPDH	Saccharopine dehydrogenase-like oxidoreductase	0.738838	-0.16753	0.890366	Q8NBX0	Q8NBX0	5	7	17.7				5	5	17.7	17.7	47.151	0	9.9182	755160000	1.48675	1.05199	1.32637	1.38016	1.53991	1.59157	1.30915	1.47476	0.82401	0.408633	-0.115417
RPL27A	60S ribosomal protein L27a	1.07486	-0.168285	0.8899	P46776	P46776	4	6	37.2				4	4	37.2	37.2	16.561	0	24.102	8751000000	5.94984	5.90669	5.88406	5.66795	6.14861	5.98567	5.90292	6.04449	3.92959	-2.3643	6.43706
PTPN1	Tyrosine-protein phosphatase non-receptor type 1	1.53762	-0.168299	0.889891	P18031	P18031	4	4	12.9				4	4	12.9	12.9	49.966	0	22.373	61469000	-1.3639	-1.40911	-1.29823	-1.25916	-1.03808	-1.15551	-1.27165	-1.19196	-0.904557	-2.77187	-1.65537
TIMM50	Mitochondrial import inner membrane translocase subunit TIM50	1.17133	-0.168443	0.889802	Q3ZCQ8-2;Q3ZCQ8;Q3ZCQ8-3	Q3ZCQ8-2;Q3ZCQ8;Q3ZCQ8-3	9	13	22.8				9	9	22.8	22.8	50.464	0	29.696	692180000	1.2599	1.27761	1.28564	1.34871	1.60756	1.55834	1.2965	1.38321	0.224641	0.917088	0.831044
PPM1G	Protein phosphatase 1G	0.489541	-0.169668	0.889047	O15355	O15355	2	3	4.4				2	2	4.4	4.4	59.271	0	2.6357	81380000	-2.12001	-2.37872	-1.88872	-2.16777	-2.20863	-2.09013	-1.64574	-1.93205	-2.59101	-1.44857	-0.650022
PPT1	Palmitoyl-protein thioesterase 1	1.38143	-0.170412	0.888589	P50897-2;P50897	P50897-2;P50897	3	4	16.3				3	3	16.3	16.3	23.093	0	37.836	74326000	-2.30304	-2.26612	-2.33884	-2.37752	-2.15314	-1.98715	-2.17962	-2.28395	-1.92968	0.244809	-2.15436
LRPPRC	Leucine-rich PPR motif-containing protein, mitochondrial	1.61414	-0.170801	0.88835	P42704;Q9NP80-3;Q9NP80-2;Q9NP80	P42704	35	56	31.8				35	35	31.8	31.8	157.9	0	197.3	6676900000	4.42994	4.38239	4.27255	4.34641	4.4828	4.62309	4.42142	4.58718	3.70394	3.11193	3.68696
SPTLC2	Serine palmitoyltransferase 2	0.983079	-0.172814	0.88711	O15270	O15270	2	3	5.5				2	2	5.5	5.5	62.924	0	4.7977	59664000	-2.39239	-2.58924	-2.74906	-2.54059	-2.43047	-2.24197	-2.4793	-2.42828	NaN	-1.93859	-3.74263
ESYT1	Extended synaptotagmin-1	2.11833	-0.173719	0.886554	Q9BSJ8;Q9BSJ8-2	Q9BSJ8;Q9BSJ8-2	8	10	10.9				8	8	10.9	10.9	122.85	0	54.185	351520000	0.54385	0.51619	0.470865	0.589693	0.775253	0.750309	0.615982	0.673931	0.143328	0.0637684	0.645402
RPL35	60S ribosomal protein L35	1.63764	-0.173951	0.886412	P42766	P42766	3	4	29.3				3	3	29.3	29.3	14.551	0	4.221	504830000	3.09659	3.12637	3.2309	3.26221	3.43666	3.40209	3.31878	3.25434	6.37588	7.85977	1.72146
RPS13	40S ribosomal protein S13	1.11445	-0.174227	0.886242	P62277	P62277	8	15	45				8	8	45	45	17.222	0	10.139	6042500000	4.23876	4.20449	4.11138	4.01783	4.48923	4.26891	4.18182	4.32941	3.70601	-2.28156	4.09002
SCFD1	Sec1 family domain-containing protein 1	1.8979	-0.175014	0.885759	Q8WVM8;Q8WVM8-2;Q8WVM8-3	Q8WVM8;Q8WVM8-2;Q8WVM8-3	2	2	4.5				2	2	4.5	4.5	72.379	0	25.943	34903000	-3.25308	-3.4226	-3.32097	-3.3385	-3.11505	-3.08412	-3.19882	-3.2371	-3.81137	NaN	-2.81208
DPM3	Dolichol-phosphate mannosyltransferase subunit 3	1.18557	-0.175866	0.885236	Q9P2X0;Q9P2X0-2	Q9P2X0;Q9P2X0-2	2	3	23.9				2	2	23.9	23.9	10.094	0.0007593	1.7046	138410000	-1.88313	-1.67076	-1.89212	-1.82086	-1.59654	-1.56407	-1.81662	-1.58619	-0.357896	-0.257703	-1.85028
CUL3	Cullin-3	1.57654	-0.176144	0.885066	Q13618-3;Q13618-2;Q13618	Q13618-3;Q13618-2;Q13618	6	7	10.7				6	6	10.7	10.7	81.092	0	7.8447	235800000	0.741571	0.543447	0.590479	0.620333	0.866171	0.874094	0.694948	0.765192	1.0832	-0.114186	-0.269071
SNX2	Sorting nexin-2	0.568974	-0.176159	0.885056	O60749-2;O60749	O60749-2;O60749	2	3	5.5				2	2	5.5	5.5	46.097	0	1.9233	84301000	-0.873529	-1.37795	-0.809019	-0.787308	-0.808954	-0.854748	-0.801802	-0.67767	-5.14073	-1.07455	-2.17645
FAM168A	Protein FAM168A	0.869447	-0.177052	0.884508	Q92567;Q92567-2;Q92567-3	Q92567;Q92567-2;Q92567-3	2	6	11.5				2	2	11.5	11.5	26.184	0	22.378	329740000	-0.823812	-1.0086	-0.914047	-0.896072	-0.611773	-0.537464	-0.942791	-0.842297	0.657569	1.96766	0.248572
PRPF40A	Pre-mRNA-processing factor 40 homolog A	1.64688	-0.177066	0.8845	O75400-2;O75400;O75400-3	O75400-2;O75400;O75400-3	5	6	6.9				5	5	6.9	6.9	105.93	0	10.222	224600000	-0.589312	-0.796541	-0.582218	-0.663389	-0.417351	-0.44857	-0.504627	-0.552647	-0.255469	-4.39977	0.175441
NKAP;NKAPL	NF-kappa-B-activating protein;NKAP-like protein	0.472221	-0.181782	0.881613	Q8N5F7;Q5M9Q1	Q8N5F7;Q5M9Q1	2	3	6.3				2	2	6.3	6.3	47.138	0	5.9717	84782000	-0.313511	-0.706705	-0.45233	-0.593367	-0.407333	0.0927582	-0.626404	-0.397804	-0.329212	-1.1081	0.437797
PRKAR2A	cAMP-dependent protein kinase type II-alpha regulatory subunit	1.07646	-0.182489	0.881181	P13861-2;P13861;P31323	P13861-2;P13861	9	13	32.7				9	9	32.7	32.7	43.066	0	29.431	519690000	1.43557	1.24554	1.44853	1.60692	1.70408	1.5151	1.69279	1.55454	2.11451	0.392793	1.50322
NSD1	Histone-lysine N-methyltransferase, H3 lysine-36 and H4 lysine-20 specific	1.05368	-0.183545	0.880537	Q96L73-2;Q96L73-3;Q96L73	Q96L73-2;Q96L73-3;Q96L73	2	1	1.3				2	2	1.3	1.3	267.34	0	1.9091	400280000	-0.549116	-0.545977	-0.689337	-0.838131	-0.453047	-0.353613	-0.630867	-0.450855	0.410065	0.347748	-1.9133
LMAN1	Protein ERGIC-53	1.49731	-0.184184	0.880147	P49257	P49257	7	11	16.5				7	7	16.5	16.5	57.548	0	16.577	668670000	0.291351	0.150524	0.261934	0.308537	0.577614	0.462296	0.313463	0.395708	1.08511	2.98602	0.591039
UQCRB	Cytochrome b-c1 complex subunit 7	0.866491	-0.185597	0.879285	P14927;P14927-2	P14927;P14927-2	2	2	27				2	2	27	27	13.53	0	8.9512	102610000	-2.61514	-2.49701	-2.3938	-2.62097	-2.20305	-2.48907	-2.16807	-2.52435	-1.59926	-0.462566	-1.48431
PABPC4	Polyadenylate-binding protein 4	0.880327	-0.18616	0.878942	Q13310-2;Q13310;Q13310-3	Q13310-2;Q13310;Q13310-3	5	7	19.8				10	5	8.6	8.6	69.578	0	4.6997	770570000	0.852318	0.714849	0.879715	0.877991	1.30822	0.976728	0.909906	0.874662	1.03132	1.29681	1.41719
GRN	Granulins;Acrogranin;Paragranulin;Granulin-1;Granulin-2;Granulin-3;Granulin-4;Granulin-5;Granulin-6;Granulin-7	0.745721	-0.1865	0.878735	P28799-2;P28799	P28799-2;P28799	2	3	7.3				2	2	7.3	7.3	46.991	0	4.3852	94778000	-2.20071	-2.14829	-1.98078	-2.15533	-1.6642	-2.05159	-1.84689	-2.17643	-1.16844	-2.54044	-3.77023
RNF20	E3 ubiquitin-protein ligase BRE1A	1.40549	-0.186949	0.878462	Q5VTR2	Q5VTR2	2	6	4.4				4	4	4.4	2.2	113.66	0	7.0325	156030000	0.0962276	-0.0990524	0.123962	0.11871	0.317846	0.293913	0.10885	0.267033	1.78554	2.77115	-0.727162
SMARCE1	SWI/SNF-related matrix-associated actin-dependent regulator of chromatin subfamily E member 1	0.425581	-0.18761	0.878059	Q969G3-6;Q969G3-5;Q969G3-3;Q969G3-2;Q969G3-4;Q969G3	Q969G3-6;Q969G3-5;Q969G3-3;Q969G3-2;Q969G3-4;Q969G3	4	7	16				4	4	16	16	34.39	0	6.042	352680000	2.18646	1.42186	2.01474	2.25926	2.21034	2.24095	2.02316	2.1583	1.53924	1.1932	0.395085
ACO2	Aconitate hydratase, mitochondrial	0.741628	-0.188227	0.877684	Q99798	Q99798	3	4	4.6				3	3	4.6	4.6	85.424	0	33.597	99774000	-1.72539	-1.2323	-1.34497	-1.30082	-1.37204	-1.10079	-1.18378	-1.19396	-0.0998659	1.32856	-0.526889
SFPQ	Splicing factor, proline- and glutamine-rich	0.427744	-0.19168	0.875586	P23246-2;P23246	P23246-2;P23246	5	7	13.2				7	5	11.7	11.7	72.262	0	12.088	693690000	1.48332	0.881281	1.77465	1.6108	1.64305	1.53291	1.73731	1.60349	1.63223	0.677987	2.37557
ENY2	Transcription and mRNA export factor ENY2	1.02233	-0.19182	0.875501	Q9NPA8-2;Q9NPA8	Q9NPA8-2;Q9NPA8	2	4	18.8				2	2	18.8	18.8	10.984	0	2.0494	112290000	0.874638	0.731548	0.857632	0.738811	0.851076	0.924658	0.940891	1.25328	1.28897	-4.03003	1.67838
NSF	Vesicle-fusing ATPase	2.2697	-0.19247	0.875106	P46459-2;P46459	P46459-2;P46459	4	7	7.3				4	4	7.3	7.3	71.583	0	5.9057	195710000	-0.362143	-0.48982	-0.395462	-0.414944	-0.122488	-0.237476	-0.296021	-0.236506	-1.21378	-2.31232	-0.0827665
CDC23	Cell division cycle protein 23 homolog	1.88271	-0.193687	0.874368	Q9UJX2;Q9UJX2-3;Q9UJX2-2	Q9UJX2;Q9UJX2-3	4	5	8.2				4	4	8.2	8.2	68.833	0	6.1396	213310000	-1.05954	-1.20115	-1.15845	-1.15271	-0.938061	-0.909513	-1.083	-0.866526	-1.2753	0.13059	-1.23623
TFG	Protein TFG	0.601787	-0.193901	0.874239	Q92734-4;Q92734-3;Q92734-2;Q92734	Q92734-4;Q92734-3;Q92734-2;Q92734	13	44	47.1				14	14	47.1	43.6	30.921	0	67.928	7598700000	4.14561	4.17354	4.18664	3.75728	4.54971	4.23848	4.0028	4.24768	4.9454	4.07231	5.79204
COX7A2	Cytochrome c oxidase subunit 7A2, mitochondrial	1.50544	-0.194504	0.873873	P14406	P14406	4	9	30.1				4	4	30.1	30.1	9.3959	0	13.089	542810000	1.37614	1.18635	1.25825	1.18073	1.5931	1.44481	1.36091	1.38066	1.82475	0.452844	1.17971
COX5B	Cytochrome c oxidase subunit 5B, mitochondrial	0.913735	-0.195369	0.87335	P10606	P10606	2	2	15.5				2	2	15.5	15.5	13.696	0	2.9456	1246300000	1.87858	1.86572	1.84104	1.62328	2.22341	2.05879	1.82244	1.88544	0.594835	NaN	2.13913
TMPO	Lamina-associated polypeptide 2, isoforms beta/gamma;Thymopoietin;Thymopentin	1.93259	-0.197296	0.872184	P42167;P42167-2	P42167;P42167-2	6	32	44.3				14	14	44.3	18.7	50.67	0	307.81	2721700000	2.77483	2.69687	2.71858	2.69257	2.87842	3.01161	2.78996	2.99204	2.42949	2.39524	2.18212
COX7C	Cytochrome c oxidase subunit 7C, mitochondrial	1.31311	-0.198812	0.871268	P15954	P15954	2	4	28.6				2	2	28.6	28.6	7.2454	0	4.6418	303230000	0.75901	0.63315	0.575573	0.463591	0.887951	0.898653	0.684847	0.755119	-0.369802	NaN	0.501933
RPS14	40S ribosomal protein S14	0.757835	-0.202645	0.868956	P62263	P62263	8	17	41.7				8	8	41.7	41.7	16.273	0	33.299	4295600000	3.76331	3.21338	3.64372	3.48101	3.57772	3.7171	3.8428	3.77438	5.25441	6.30954	4.22671
SEH1L	Nucleoporin SEH1	1.35333	-0.204368	0.867919	Q96EE3;Q96EE3-1	Q96EE3;Q96EE3-1	2	3	7.8				2	2	7.8	7.8	39.648	0	18.899	118280000	-1.97482	-2.07321	-2.03625	-1.97255	-1.74504	-1.62424	-1.95355	-1.91653	NaN	NaN	-2.98721
ILVBL	Acetolactate synthase-like protein	0.43019	-0.20585	0.867028	A1L0T0	A1L0T0	4	4	10				4	4	10	10	67.867	0	30.538	106010000	-1.74082	-1.19898	-1.68812	-1.67933	-0.868181	-1.43759	-1.58336	-1.59473	-1.07336	-0.299987	-2.01504
NUP153	Nuclear pore complex protein Nup153	0.448758	-0.207474	0.866052	P49790-2;P49790;P49790-3	P49790-2;P49790;P49790-3	3	3	2.9				3	3	2.9	2.9	149.39	0	5.2163	112690000	-2.89228	-3.67843	-2.80651	-2.87245	-2.83437	-2.8564	-2.91807	-2.81094	-3.03548	-3.17446	-3.04773
EIF3E	Eukaryotic translation initiation factor 3 subunit E	0.612631	-0.207508	0.866032	P60228	P60228	4	6	10.1				4	4	10.1	10.1	52.22	0	6.4786	306830000	0.880241	0.262184	0.935179	0.870298	0.877131	0.969187	0.983543	0.948074	1.09473	-2.58485	1.57274
PFKP	ATP-dependent 6-phosphofructokinase, platelet type	1.19518	-0.212743	0.862895	Q01813;Q01813-2	Q01813;Q01813-2	5	8	12.2				7	7	12.2	8.7	85.595	0	13.9	556820000	1.13836	0.783142	1.16559	1.09314	1.2218	1.19012	1.30105	1.31822	1.42686	-3.12306	1.04898
NSDHL	Sterol-4-alpha-carboxylate 3-dehydrogenase, decarboxylating	0.82581	-0.222043	0.85735	Q15738	Q15738	3	4	10.7				3	3	10.7	10.7	41.9	0	11.022	186770000	-0.811747	-1.31463	-0.786499	-0.876604	-0.577747	-0.743418	-0.819933	-0.760208	-1.70072	-0.626807	-1.06449
CKAP2	Cytoskeleton-associated protein 2	0.723256	-0.222452	0.857108	Q8WWK9-6;Q8WWK9-5;Q8WWK9;Q8WWK9-4	Q8WWK9-6;Q8WWK9-5;Q8WWK9;Q8WWK9-4	2	1	4.6				2	2	4.6	4.6	71.194	0	3.0868	78958000	-2.02095	-1.79854	-1.85553	-2.37531	-1.79762	-1.58081	-1.93789	-1.8442	-1.39782	-3.88348	-2.10441
SAR1A;SAR1B	GTP-binding protein SAR1a;GTP-binding protein SAR1b	0.616404	-0.228951	0.853255	Q9NR31;Q9NR31-2;Q9Y6B6	Q9NR31;Q9NR31-2;Q9Y6B6	2	2	15.7				2	2	15.7	15.7	22.367	0	11.312	377180000	0.130522	-0.587091	0.0365314	0.132208	0.176323	0.0605106	0.214981	0.176161	0.265948	NaN	0.553014
SRP72	Signal recognition particle subunit SRP72	3.25929	-0.229324	0.853035	O76094;O76094-2	O76094;O76094-2	5	5	14.5				5	5	14.5	14.5	74.605	0	11.193	233330000	-0.565111	-0.698713	-0.609877	-0.629442	-0.38722	-0.415752	-0.344437	-0.438438	-0.989954	NaN	0.0205526
SPCS2	Signal peptidase complex subunit 2	1.9061	-0.233799	0.850392	Q15005	Q15005	2	4	12.4				2	2	12.4	12.4	25.003	0	8.7477	242890000	-0.730862	-0.785101	-0.833693	-0.786037	-0.37685	-0.548208	-0.669813	-0.605623	-0.476205	NaN	-0.642858
BAG2	BAG family molecular chaperone regulator 2	1.28602	-0.235585	0.84934	O95816;O95816-2	O95816;O95816-2	13	31	61.6				13	13	61.6	61.6	23.772	0	106.11	5811100000	4.02805	4.32742	3.93861	4.01047	4.23056	4.4363	4.25957	4.32046	3.81554	4.1284	1.31671
LETM1	LETM1 and EF-hand domain-containing protein 1, mitochondrial	2.40895	-0.236187	0.848986	O95202	O95202	2	3	4.5				2	2	4.5	4.5	83.353	0	3.6569	576570000	0.183195	0.0717831	0.232374	0.282747	0.48068	0.451229	0.359947	0.422993	-0.812087	NaN	0.206374
DHCR24	Delta(24)-sterol reductase	1.50694	-0.238256	0.84777	Q15392-2;Q15392	Q15392-2;Q15392	5	8	10.7				5	5	10.7	10.7	54.75	0	6.4817	302080000	0.778456	0.731863	0.648516	0.641361	1.045	1.07884	0.73765	0.891737	0.986606	-2.12324	0.0376539
EIF4G2	Eukaryotic translation initiation factor 4 gamma 2	1.28127	-0.240332	0.846551	P78344-2;P78344	P78344-2;P78344	6	10	9.4				6	6	9.4	9.4	98.149	0	14.304	492720000	1.74545	1.37107	1.75175	1.72216	1.96924	1.91493	1.79292	1.87466	2.21644	-0.554164	1.63545
DHTKD1	Probable 2-oxoglutarate dehydrogenase E1 component DHKTD1, mitochondrial	0.368758	-0.240486	0.84646	Q96HY7	Q96HY7	2	4	3.7				2	2	3.7	3.7	103.08	0.0028169	1.3921	2234100000	-0.139835	-1.34774	-0.327724	-0.226522	-0.309467	-0.208637	-0.312462	-0.249315	-0.463693	-1.89808	0.977759
GPD2	Glycerol-3-phosphate dehydrogenase, mitochondrial	0.977444	-0.242627	0.845205	P43304;P43304-2	P43304;P43304-2	2	6	4				2	2	4	4	80.852	0	3.9455	97724000	-0.16251	-0.704037	-0.188124	-0.301657	-0.0728378	-0.0818501	-0.162733	-0.0683975	-1.73036	1.34743	-0.663175
PSMC1	26S protease regulatory subunit 4	1.24947	-0.243508	0.844689	P62191-2;P62191	P62191-2;P62191	5	5	15.8				5	5	15.8	15.8	41.167	0	11.017	180130000	0.0408306	-0.204281	0.17794	0.191923	0.29664	0.418501	0.190752	0.274553	3.09452	4.27165	-0.912881
LAMP1	Lysosome-associated membrane glycoprotein 1	1.68667	-0.246032	0.843212	P11279-2;P11279	P11279-2;P11279	3	3	12.4				3	3	12.4	12.4	38.985	0	16.706	147910000	-1.00646	-1.24632	-1.15049	-1.03073	-0.734064	-0.80785	-0.978123	-0.929829	-1.32658	-0.187426	-1.503
MAZ;VEZF1;PATZ1	Myc-associated zinc finger protein;Vascular endothelial zinc finger 1;POZ-, AT hook-, and zinc finger-containing protein 1	0.58352	-0.246142	0.843148	P56270-3;P56270;P56270-2;Q14119;Q9HBE1-4;Q9HBE1-2;Q9HBE1-3;Q9HBE1	P56270-3;P56270;P56270-2;Q14119;Q9HBE1-4;Q9HBE1-2;Q9HBE1-3;Q9HBE1	2	2	3.5				2	2	3.5	3.5	46.365	0	2.737	59376000	-1.38287	-0.772741	-0.987803	-0.823027	-0.995758	-0.347578	-0.892576	-0.745962	-0.664512	NaN	-1.44464
AGK	Acylglycerol kinase, mitochondrial	1.275	-0.251092	0.84026	Q53H12;Q53H12-2	Q53H12	7	10	10.9				7	7	10.9	10.9	47.137	0	11.224	814920000	2.75256	2.43686	2.86718	2.63612	2.96174	3.01665	2.78349	2.93522	2.77722	0.903926	1.46363
ATPIF1	ATPase inhibitor, mitochondrial	0.923303	-0.251195	0.8402	Q9UII2-3;Q9UII2-2;Q9UII2	Q9UII2-3;Q9UII2-2;Q9UII2	2	3	31.7				2	2	31.7	31.7	6.5922	0	2.1579	124980000	-0.548359	-0.526417	-0.0483341	-0.523247	-0.159664	-0.307936	0.0149822	-0.188959	1.36172	2.00614	0.68986
NDUFAF2	Mimitin, mitochondrial	1.94447	-0.252857	0.839233	Q8N183	Q8N183	2	2	16				2	2	16	16	19.856	0	11.755	126800000	-1.87807	-2.01875	-1.86644	-1.85618	-1.48102	-1.66912	-1.74106	-1.71681	-1.20721	-3.16205	-1.59218
NDUFS3	NADH dehydrogenase [ubiquinone] iron-sulfur protein 3, mitochondrial	0.610765	-0.25597	0.837424	O75489;O75489-2	O75489	8	10	34.8				8	8	34.8	34.8	30.241	0	8.6294	566100000	1.19171	1.31172	0.949291	0.944941	1.23289	1.48814	0.93737	1.76313	0.932025	-0.0030098	1.48285
SLIRP	SRA stem-loop-interacting RNA-binding protein, mitochondrial	1.10892	-0.258069	0.836206	Q9GZT3-2;Q9GZT3	Q9GZT3-2;Q9GZT3	4	8	35.5				4	4	35.5	35.5	12.122	0	42.39	882090000	1.53109	1.00836	1.40562	1.4581	1.52143	1.61945	1.61487	1.67969	0.807549	0.777106	1.34104
ATP1B3	Sodium/potassium-transporting ATPase subunit beta-3	1.16102	-0.262858	0.833435	P54709;P54709-2	P54709;P54709-2	2	1	7.9				2	2	7.9	7.9	31.512	0	4.1	76941000	-2.56922	-2.66841	-2.79517	-3.01751	-2.42838	-2.34302	-2.6421	-2.58537	-2.34374	NaN	-2.86751
VDAC1	Voltage-dependent anion-selective channel protein 1	1.68294	-0.265619	0.831842	P21796	P21796	19	42	83.4				20	20	83.4	79.5	30.772	0	323.31	7591300000	4.27943	4.12461	4.21194	3.96666	4.53749	4.44732	4.36307	4.29724	3.1294	2.79602	3.46733
NDUFA9	NADH dehydrogenase [ubiquinone] 1 alpha subcomplex subunit 9, mitochondrial	1.35734	-0.269465	0.829627	Q16795	Q16795	2	2	8.2				2	2	8.2	8.2	42.509	0	7.1197	39996000	-2.51821	-2.9422	-2.67264	-2.60459	-2.29569	-2.35401	-2.50719	-2.50289	-4.02329	-0.123715	-2.48219
DCTN2	Dynactin subunit 2	0.744037	-0.271725	0.828328	Q13561;Q13561-3;Q13561-2	Q13561;Q13561-3;Q13561-2	4	6	12				4	4	12	12	44.23	0	18.616	109770000	0.254988	-0.321468	0.463793	0.396387	0.487638	0.4828	0.428038	0.482124	3.49834	5.01555	0.102864
TFRC	Transferrin receptor protein 1;Transferrin receptor protein 1, serum form	1.33071	-0.277854	0.824817	P02786;Q9UP52-2;Q9UP52-3;Q9UP52	P02786	10	19	15.4				10	10	15.4	15.4	84.87	0	27.126	1549500000	2.59383	2.48373	2.79247	2.74445	3.10092	3.00545	2.69847	2.92106	5.07391	6.35809	2.89437
MAGT1	Magnesium transporter protein 1	1.41368	-0.279307	0.823987	Q9H0U3;Q9H0U3-2	Q9H0U3;Q9H0U3-2	4	6	12.2				4	4	12.2	12.2	38.036	0	5.5404	222790000	0.627396	0.315195	0.704617	0.691942	0.932976	0.895935	0.705978	0.921488	NaN	NaN	-0.835595
RPS24	40S ribosomal protein S24	1.22063	-0.280878	0.82309	P62847-2;P62847-3;P62847;P62847-4	P62847-2;P62847-3;P62847;P62847-4	2	2	16.9				3	3	16.9	15.4	15.069	0	23.307	577620000	-0.207296	-0.755062	-0.365475	-0.377018	-0.105324	-0.208191	-0.0659409	-0.201885	-3.1171	-2.22833	0.253627
EFTUD2	116 kDa U5 small nuclear ribonucleoprotein component	1.05614	-0.282939	0.821915	Q15029-2;Q15029-3;Q15029	Q15029-2;Q15029-3;Q15029	6	9	9				7	6	7.9	7.9	105.38	0	9.5969	241870000	0.949219	0.515915	1.06297	0.998413	1.11444	1.08271	1.35072	1.1104	3.89252	5.01022	0.669196
ATP5J	ATP synthase-coupling factor 6, mitochondrial	1.84799	-0.284402	0.821082	P18859;P18859-2	P18859;P18859-2	2	4	22.2				2	2	22.2	22.2	12.587	0	16.14	127010000	-2.42937	-2.2513	-2.12164	-2.20046	-1.86628	-1.91475	-2.1048	-1.97931	-2.25368	-2.60525	-2.07396
CYB5R3	NADH-cytochrome b5 reductase 3;NADH-cytochrome b5 reductase 3 membrane-bound form;NADH-cytochrome b5 reductase 3 soluble form	1.45389	-0.28878	0.818594	P00387-2;P00387;P00387-3	P00387-2;P00387;P00387-3	2	3	16.5				2	2	16.5	16.5	31.628	0	8.8491	513780000	0.391129	0.118069	0.458189	0.361507	0.763836	0.730314	0.439276	0.550589	-0.31965	-0.933671	0.549664
HSPA4	Heat shock 70 kDa protein 4	0.571101	-0.291109	0.817274	P34932	P34932	3	3	4.9				3	3	4.9	4.9	94.33	0	4.1551	137860000	-0.980803	-1.74199	-0.771278	-0.724298	-0.749168	-0.706402	-0.87215	-0.726215	-4.74831	NaN	0.00572491
OPA1	Dynamin-like 120 kDa protein, mitochondrial;Dynamin-like 120 kDa protein, form S1	2.24444	-0.292307	0.816595	O60313;O60313-2	O60313;O60313-2	6	9	9.5				6	6	9.5	9.5	111.63	0	15.503	348280000	0.0386486	-0.168518	-0.104401	-0.115368	0.184626	0.343025	0.0819626	0.209976	-0.695979	0.26007	-0.198215
PPM1J	Protein phosphatase 1J	0.954894	-0.297173	0.813846	Q5JR12;Q5JR12-2	Q5JR12;Q5JR12-2	4	8	8.7				5	4	6.9	6.9	54.834	0	8.8508	2931300000	2.70633	3.25814	3.13151	2.87399	3.54073	3.33076	3.21566	3.07151	2.56014	2.6139	1.35893
PSMB4	Proteasome subunit beta type-4	1.58937	-0.311028	0.806067	P28070	P28070	2	4	14				2	2	14	14	29.204	0	7.541	242920000	0.359064	0.0253792	0.461525	0.401154	0.710058	0.662539	0.589464	0.529175	1.57058	0.919547	0.449788
AGTPBP1	Cytosolic carboxypeptidase 1	0.401667	-0.321623	0.800169	Q9UPW5-2;Q9UPW5;Q9UPW5-3	Q9UPW5-2;Q9UPW5;Q9UPW5-3	2	1	3				2	2	3	3	133.86	0.0034674	1.333	66747000	-0.0853004	-1.42179	0.0427113	-0.125402	-0.229561	-0.185986	0.00610924	0.10615	1.91927	2.68042	-0.0293493
EEF1B2	Elongation factor 1-beta	0.538417	-0.324353	0.798657	P24534	P24534	3	3	19.6				3	3	19.6	19.6	24.763	0	6.5891	315090000	0.983368	0.0479755	1.1752	0.969757	1.03175	0.879278	1.43783	1.12485	1.99884	1.22249	2.33547
EIF2B5	Translation initiation factor eIF-2B subunit epsilon	0.682918	-0.326066	0.797708	Q13144	Q13144	3	6	7.4				3	3	7.4	7.4	80.379	0	7.245	1356500000	0.00671387	-0.0938721	-0.00126076	0.73538	0.467014	0.762264	0.152897	0.569052	0.180154	NaN	-0.282722
TPD52L2	Tumor protein D54	1.39188	-0.346177	0.786666	O43399-2;O43399-4;O43399;O43399-3;O43399-5;O43399-7;O43399-6	O43399-2;O43399-4;O43399;O43399-3;O43399-5;O43399-7;O43399-6	4	4	39.2				5	5	39.2	31.2	19.901	0	5.0984	282460000	0.149004	-0.205414	0.309118	0.344616	0.588097	0.469347	0.386618	0.53797	0.736407	0.640249	-0.0699282
NDUFB5	NADH dehydrogenase [ubiquinone] 1 beta subcomplex subunit 5, mitochondrial	1.10319	-0.355414	0.781645	O43674-2;O43674	O43674-2;O43674	2	3	19.7				2	2	19.7	19.7	15.667	0	3.3373	116010000	-0.769365	-1.43527	-0.71269	-0.915594	-0.522869	-0.600315	-0.687624	-0.600456	-1.01267	-1.28276	-0.39511
DSP	Desmoplakin	0.623527	-0.357383	0.780579	P15924;P15924-3;P15924-2	P15924;P15924-3;P15924-2	21	27	9.1				21	21	9.1	9.1	331.77	0	70.946	814400000	3.14655	2.29556	3.18092	3.2481	3.49673	3.56039	2.87986	3.36369	2.00124	1.39565	1.30695
PDCD6IP	Programmed cell death 6-interacting protein	0.379294	-0.372705	0.772333	Q8WUM4-2;Q8WUM4;Q8WUM4-3	Q8WUM4-2;Q8WUM4	3	4	6.2				3	3	6.2	6.2	96.771	0	8.7915	9529700000	-0.438814	-2.06815	-0.238138	-0.440458	-0.405479	-0.488699	-0.474817	-0.325747	0.207774	0.235087	-1.78722
NDUFS8	NADH dehydrogenase [ubiquinone] iron-sulfur protein 8, mitochondrial	1.79897	-0.376842	0.770121	O00217	O00217	4	7	21.4				4	4	21.4	21.4	23.705	0	7.0457	544790000	0.269854	0.126312	0.257259	0.294153	0.585125	0.876854	0.355951	0.637018	0.0492067	-0.834696	0.554631
EIF2B3	Translation initiation factor eIF-2B subunit gamma	1.60151	-0.386455	0.765007	Q9NR50;Q9NR50-3;Q9NR50-2	Q9NR50;Q9NR50-3;Q9NR50-2	7	8	19.9				7	7	19.9	19.9	50.24	0	10.936	526500000	0.933674	0.548649	0.703999	0.412132	1.16418	1.13629	0.902952	0.940842	-1.01047	-4.26324	0.150121
COG6	Conserved oligomeric Golgi complex subunit 6	0.54941	-0.412781	0.751174	Q9Y2V7-2;Q9Y2V7	Q9Y2V7-2;Q9Y2V7	2	3	3.7				2	2	3.7	3.7	68.411	0	2.8464	223490000	0.421293	-1.00347	0.414268	0.311596	0.490168	0.513462	0.341106	0.450073	0.709438	NaN	-0.53547
CELF1	CUGBP Elav-like family member 1	0.606344	-0.422375	0.746195	Q92879-5;Q92879-2;Q92879-3;Q92879-6;Q92879;Q92879-4	Q92879-5;Q92879-2;Q92879-3;Q92879-6;Q92879;Q92879-4	2	2	4.9				2	2	4.9	4.9	50.13	0	3.1157	106920000	-1.07982	-1.89826	-0.46821	-0.605465	-0.509336	-0.789948	-0.54978	-0.513195	-1.99798	-3.01935	-0.958957
FUBP1	Far upstream element-binding protein 1	2.39912	-0.430743	0.74188	Q96AE4;Q96AE4-2	Q96AE4;Q96AE4-2	3	5	10.9				8	3	5.6	5.6	67.56	0	6.8202	380740000	-0.879337	-0.939915	-0.722555	-0.887247	-0.58386	-0.538744	-0.226122	-0.357357	0.0750389	-1.4464	0.635446
PDCD6	Programmed cell death protein 6	0.874915	-0.437624	0.73835	O75340-2;O75340	O75340-2;O75340	2	3	12.7				2	2	12.7	12.7	21.664	0	2.9096	157450000	1.91712	1.0436	1.99882	2.0827	2.33898	2.27728	2.00495	2.17152	4.59409	5.32711	-0.764039
NOP9	Nucleolar protein 9	0.821134	-0.44892	0.732591	Q86U38;Q86U38-2	Q86U38;Q86U38-2	2	2	4.2				2	2	4.2	4.2	69.437	0	3.9844	88638000	-1.92813	-1.49866	-2.0401	-1.5687	-0.943222	-0.917599	-1.91855	-1.46054	-0.500262	-0.362508	-3.0321
IPO13	Importin-13	0.715445	-0.507323	0.703527	O94829	O94829	2	2	3.4				2	2	3.4	3.4	108.19	0	23.701	26180000	-0.728764	-1.96802	-0.607185	-0.557007	-0.366276	-0.309914	-0.673521	-0.481977	-1.53323	NaN	-3.86144
ST5	Suppression of tumorigenicity 5 protein	0.41576	-0.563341	0.676733	P78524;P78524-2;P78524-3	P78524;P78524-2;P78524-3	2	1	3.3				2	2	3.3	3.3	126.48	0.0056533	1.0452	1850700	-10.3063	-9.95061	-10.1323	-9.04873	-8.80537	-8.62278	NaN	-10.4603	NaN	NaN	NaN
TUBB2B	Tubulin beta-2B chain	1.10369	-0.599905	0.659797	Q9BVA1	Q9BVA1	2	3	51.9				21	3	7	3.6	49.953	0	4.7608	519410000	1.02362	1.5545	0.936548	0.62048	2.19034	1.29277	1.34692	1.70474	2.26201	NaN	1.30925
DNAH1	Dynein heavy chain 1, axonemal	1.62866	-0.644086	0.639898	Q9P2D7-5;Q9P2D7-2;Q9P2D7-4;Q9P2D7;Q9P2D7-3	Q9P2D7-5;Q9P2D7-2;Q9P2D7-4;Q9P2D7;Q9P2D7-3	2	1	1				2	2	1	1	360.96	0.0056215	1.0369	591940000	-0.706442	0.0471516	-0.535952	-0.607534	0.481489	0.287163	0.139223	-0.134306	NaN	-2.98572	-4.22376
DRG1	Developmentally-regulated GTP-binding protein 1	0.410399	-0.645059	0.639467	Q9Y295	Q9Y295	2	2	7.4				2	2	7.4	7.4	40.542	0	2.2089	22311000	-4.51213	-2.55048	-4.11226	-4.282	-2.27126	-2.32286	-4.13024	-4.15226	NaN	-4.13447	-3.84656
CSTF3	Cleavage stimulation factor subunit 3	1.09118	-0.730659	0.602629	Q12996;Q12996-2	Q12996;Q12996-2	2	2	3.2				2	2	3.2	3.2	82.921	0	2.2889	33844000	-4.02931	-2.75969	-3.99165	-3.17871	-2.99694	-2.36826	-3.0176	-2.65392	-2.04166	NaN	-0.788255
RAF1	RAF proto-oncogene serine/threonine-protein kinase	0.393356	-0.737756	0.599671	P04049;P04049-2	P04049;P04049-2	2	2	7.4				3	3	7.4	5.9	73.051	0	12.9	102370000	1.70684	-1.22352	2.24006	2.13688	2.01944	1.81112	1.97873	2.00198	NaN	0.502798	-1.28243
PLK1	Serine/threonine-protein kinase PLK1	0.596122	-0.784189	0.580678	P53350	P53350	2	2	4.5				2	2	4.5	4.5	68.254	0	5.4396	113760000	0.267944	-1.77415	0.777679	0.655918	0.975409	0.981949	0.243614	0.863174	0.487557	-4.08587	-1.89216
SYNE2	Nesprin-2	0.602252	-0.820431	0.566273	Q8WXH0;Q8WXH0-2	Q8WXH0;Q8WXH0-2	2	1	0.6				2	2	0.6	0.6	796.43	0.005618	1.0368	19622000	-3.19979	-5.04255	-2.23443	-2.61236	-2.15021	-2.3713	-2.9229	-2.363	-0.0720749	-0.647106	-1.49534
RAB29;RAB38;RAB32	Ras-related protein Rab-7L1;Ras-related protein Rab-38;Ras-related protein Rab-32	3.77318	-1.02871	0.490147	O14966;O14966-3;O14966-2;P57729;Q13637	O14966;O14966-3;O14966-2;P57729;Q13637	2	2	15.8				2	2	15.8	15.8	23.155	0	5.7883	58584000	-3.23526	-3.15422	-3.37355	-2.94971	-1.98335	-2.02757	-2.35396	-2.233	-1.8876	-3.01835	-2.83178
